# Supplementary material
Source: publisher figshare collection journal article supplement (https://acs.figshare.com/ndownloader/files/30828409)
Supplement: Supplementary file 1 [file 30828409]

## ***Electronic Supplementary Information (ESI)***

Functionalization Methodology for Synthesis of Silane-End-Functionalized Linear and Star Poly(aryl isocyanide)s by Combination of Cationic Polymerization and Hydrosilylation Reaction

*Tuemay Abadi Belay, Jupeng Chen, HuanXu, ShaowenZhang, ShiluChen, \*Xiaofang Li\**

Key Laboratory of Cluster Science of Ministry of Education, School of Chemistry and Chemical Engineering, Beijing Institute of Technology, 5 South Zhongguancun Street, Haidian District, Beijing 10081, China

### **Table of contents**

### **Experimental Section**

#### **Materials**

#### **General Methods**

**Scheme S1.** Synthesis of 1,3,5-Tris(dimethylsilyl) Benzene

**Scheme S2.** Synthesis of 4-Ethoxycarbonyl Phenyl Isocyanides (**EPI**)

Synthesis of 4-Aminobenzoate

Synthesis of 4-Formamidobenzoate

Synthesis of 4-Ethoxycarbonyl Phenyl Isocyanide

**Scheme S3.** Synthesis of 4-Isocyano-4-(1,1,2-Triphenylvinyl)-1-Phenyl (**ITPP**)

Synthesis of (2-(4-Aminophenyl)-Ethene-1,1,2-Triyl)-Tribenzene

Synthesis of (2-(4-Formamidophenyl)-Ethene-1,1,2-Triyl)-Tribenzene

Synthesis of (2-(4-Isocyanophenyl)-Ethene-1,1,2-Triyl)-Tribenzene

**Scheme S4.** Synthesis of 4-Isocyano-4-(1,1,2-Triphenylvinyl)-1-Phenyl-1-Anisol (**ITPPA**)

Synthesis of 4-Methoxytetraphenylethene

Synthesis of N-(4-Iodophenyl)-Formamide

Synthesis of N-(4'-(1,2,2-Triphenylvinyl)-[1-Phenoxy-1-Phenyl]-4-yl)-Formamide

Synthesis of 4-Isocyano-4'-(1,2,2-Triphenylvinyl)-1-Phenyl-1-Anisol

**Scheme S5.** Synthesis of (*IS,2R,5S*)-2-Isopropyl-5-Methyleycyclohexyl-4-Isocyanobenzoate (**D-IMCI**) and (*IR,2S,5R*)-2-Isopropyl-5-Methyleycyclohexyl-4-Isocyanobenzoate (**L-IMCI**)

Synthesis of (*IS,2R,5S*)-2-Isopropyl-5-Methyleycyclohexyl-4-Nitrobenzoate

Synthesis of (*IS,2R,5S*)-2-Isopropyl-5-Methyleycyclohexyl-4-Aminobenzoate

Synthesis of (*IS,2R,5S*)-2-Isopropyl-5-Methyleycyclohexyl-4-Formamidobenzoate

Synthesis of (*IS,2R,5S*)-2-Isopropyl-5-Methyleycyclohexyl-4-Isocyanobenzoate

Synthesis of (*IR,2S,5R*)-2-Isopropyl-5-Methyleycyclohexyl-4-Nitrobenzoate

Synthesis of (*IR,2S,5R*)-2-Isopropyl-5-Methyleycyclohexyl-4-Aminobenzoate

Synthesis of (*IR,2S,5R*)-2-Isopropyl-5-Methyleycyclohexyl-4-Formamidobenzoate

Synthesis of (*IR,2S,5R*)-2-Isopropyl-5-Methyleycyclohexyl-4-Isocyanobenzoate

**A typical procedure** for the linear polymerization of 4-ethoxycarbonyl phenyl isocyanide (EPI) with Et<sub>3</sub>Si-H as end-functionalized agent ([Table 1, entry 4](#)).

**A typical procedure** for the three star random and homo-copolymerization of (*IS,2R,5S*)-2-isopropyl-5-methyleycyclohexyl-4-isocyanobenzoate (D-IMCI) with 4-isocyano-4'-(1,2,2-triphenylvinyl)-1-phenyl-1-anisol (ITPPA) with 1,3,5-tris(dimethylsilyl)benzene as core-first functional agent ([Table 3, entry 5](#)).

**Figure S1.** <sup>1</sup>H NMR spectrum of 4-ethoxycarbonyl phenyl isocyanide (**a**).

**Figure S2.** <sup>13</sup>C NMR spectrum of 4-ethoxycarbonyl phenyl isocyanide (**a**).

**Figure S3.** <sup>1</sup>H NMR spectrum of 4-isocysno-4-(1,1,2-triphenylvinyl)-1-phenyl (ITPP) (**b**).

**Figure S4.** <sup>13</sup>C NMR spectrum of 4-isocysno-4-(1,1,2-triphenylvinyl)-1-phenyl (ITPP) (**b**).

**Figure S5.** <sup>1</sup>H NMR spectrum of 4-isocysno-4-(1,1,2-triphenylvinyl)-1-phenoxy-1-anisol (ITPPA) (**c**).

**Figure S6.** <sup>13</sup>C NMR spectrum of 4-isocysno-4-(1,1,2-triphenylvinyl)-1-phenoxy-1-anisol (ITPPA) (**c**).

**Figure S7.**  $^1\text{H}$  NMR spectrum of (*1S,2R,5S*)-2-isopropyl-5-methylcyclohexyl-4-isocyanobezate (**d**).

**Figure S8.**  $^{13}\text{C}$  NMR spectrum of (*1S,2R,5S*)-2-isopropyl-5-methylcyclohexyl-4-isocyanobezate (**d**).

**Figure S9.**  $^1\text{H}$  NMR spectrum of (*1R,2S,5R*)-2-isopropyl-5-methylcyclohexyl-4-isocyanobezate (**e**).

**Figure S10.**  $^{13}\text{C}$  NMR spectrum of (*1R,2S,5R*)-2-isopropyl-5-methylcyclohexyl-4-isocyanobezate (**e**).

**Figure S11.**  $^1\text{H}$  NMR spectra of  $\text{Et}_3\text{SiH}$ .

**Figure S12.** (a)  $^1\text{H}$  NMR spectra of  $\text{Et}_3\text{SiH}$  and (b) corresponding cationic species in situ generated by reaction of  $\text{Et}_3\text{SiH}$  with catalyst  $[\text{Ph}_3\text{C}][\text{B}(\text{C}_6\text{F}_5)_4]$ .

**Figure S13.**  $^1\text{H}$  NMR of poly(EPI) with  $\text{Et}_3\text{SiH}$  as end group (Table 2, entry 4).

**Figure S14.** (a)  $^1\text{H}$  NMR of poly(EPI) (Table 2, entry 4), (b) Poly(ITPPA) (Table 2, entry 8), (c) Poly(D-IMCI) (Table 3, entry 9) and (d) Poly(L-IMCI) (Table 2, entry 10).

**Figure S15.**  $^1\text{H}$  NMR of poly(EPI) with different silane source as end group (Table 2, entries 1–2).

**Figure S16.**  $^1\text{H}$  NMR of poly(EPI) with different silane source as end group (Table 2, entries 3, 5–6).

**Figure S17.**  $^{29}\text{Si}$  NMR spectrum of  $\text{Et}_3\text{SiH}$  and  $\text{Et}_3\text{Si}$ -end-functionalized poly(EPI) (Table 2, entry 4).

**Figure S18.** ( $^1\text{H} + ^{29}\text{Si}$ ) gHMBC NMR spectrum of  $\text{Et}_3\text{Si}$ -end-functionalized poly(EPI) (Table 2, entry 4).

**Figure S19.**  $^{29}\text{Si}$ -NMR spectrum of  $\text{Et}_3\text{SiH}$  and  $\text{Et}_3\text{Si}$ -end-functionalized poly(ITPPA) (Table 2, entry 8).

**Figure S20.**  $^{29}\text{Si}$ -NMR spectrum of  $\text{PhSiH}_3$  and  $\text{PhSi}$ -end-functionalized star poly(EPI) (Table 3, entry 1).

**Figure S21.**  $^{29}\text{Si}$ -NMR spectrum of  $\text{PhMe}_2\text{Si}$ -end-functionalized poly(EPI) (Table 2, entry 1).

**Figure S22.**  $^{29}\text{Si}$ -NMR spectrum of  $(4\text{-}^i\text{PrC}_6\text{H}_4)\text{Me}_2\text{Si}$ -end-functionalized poly(EPI) (Table 2, entry 2).

**Figure S23.**  $^{29}\text{Si}$ -NMR spectrum of  $\text{Ph}_3\text{Si}$ -end-functionalized poly(EPI) (Table 2, entry 3).

**Figure S24.**  $^{29}\text{Si}$ -NMR spectrum of  $^i\text{Pr}_3\text{Si}$ -end-functionalized poly(EPI) (Table 2, entry 5).

**Figure S25.**  $^{29}\text{Si}$ -NMR spectrum of  $(\text{OEt})_3\text{Si}$ -end-functionalized poly(EPI) (Table 2, entry 6).

**Figure S26.** FT-IR spectra of monomers (a)  $\text{Et}_3\text{SiH}$ , (b) EPI, (c) ITPPA, (d) D-IMCI and (e) L-IMCI.

**Figure S27.** FT-IR spectra of (a) Poly(EPI) (Table 2, entry 4), (b) Poly(ITPPA) (Table 2, entry 8), (c) Poly(D-IMCI) (Table 2, entry 9), (d) Poly(L-IMCI) (Table 2, entry 10).

**Figure S28.** FT-IR spectra of  $\text{PhSiH}_3$  and  $\text{PhSi}$ -end-functionalized star poly(EPI) (Table 3, entry 1).

**Figure S29.** FT-IR spectra of PhMe<sub>2</sub>SiH and PhMe<sub>2</sub>Si-end-functionalized poly(EPI) (Table 2, entry 1).

**Figure S30.** FT-IR spectra of (4-*i*PrC<sub>6</sub>H<sub>4</sub>)Me<sub>2</sub>SiH and (4-*i*PrC<sub>6</sub>H<sub>4</sub>)Me<sub>2</sub>Si-end-functionalized poly(EPI) (Table 2, entry 2).

**Figure S31.** FT-IR spectra of Ph<sub>3</sub>SiH and Ph<sub>3</sub>Si-end-functionalized poly(EPI) (Table 2, entry 3).

**Figure S32.** FT-IR spectra of *i*Pr<sub>3</sub>SiH and *i*Pr<sub>3</sub>Si-end-functionalized poly(EPI) (Table 2, entry 5).

**Figure S33.** FT-IR spectra of (OEt)<sub>3</sub>SiH and (OEt)<sub>3</sub>Si-end-functionalized poly(EPI) (Table 2, entry 6).

**Figure S34.** Plots of fluorescence intensity vs water fraction in THF/water mixture (0.01 mg/mL) (A) ITPP, (B) Poly(ITPP) (Table 2, entry 7), (C) ITPPA, (D) Poly(ITPPA) (Table 3, entry 8) (conditions: EX wavelength: 290 nm, EX slit: 5 nm, EM slit: 5 nm, 700 V).

**Figure S35.** UV absorption and transmittance spectra of (A) ITPP, (B) Poly(ITPP) (Table 2, entry 7), (C) ITPPA and (D) Poly(ITPPA) (Table 2, entry 8) with the water fraction in THF/water mixture ranging from 0 to 95%.

**Figure S36.** CD Spectra of Et<sub>3</sub>Si-end-functionalized poly(D-IMCI) and Et<sub>3</sub>Si-end-functionalized poly(L-IMCI) (Table 2, entries 9–10).

**Figure S37.** (a) <sup>1</sup>H NMR spectra of 1,3,5-(SiMe<sub>2</sub>H)<sub>3</sub>-C<sub>6</sub>H<sub>3</sub> and (b) corresponding cationic species *in situ* generated by reaction of Poly-Si-H with catalyst [Ph<sub>3</sub>C][B(C<sub>6</sub>F<sub>5</sub>)<sub>4</sub>].

**Figure S38.** <sup>1</sup>H NMR spectra of Poly(ITPPA) (Table 2, entry 8), Poly(D-IMCI-*co*-ITPPA)s (Table 3, entries 4–8) and Poly(D-IMCI) (Table 3, entry 9).

**Figure S39.** <sup>1</sup>H NMR spectra of Poly(ITPPA) (Table 2, entry 8), Poly(L-IMCI-*co*-ITPPA)s (Table 4, entries 9–13) and Poly(L-IMCI) (Table 3, entry 10).

**Figure S40.** <sup>29</sup>Si-NMR spectrum of poly(D-IMCI) (Table 3, entry 2).

**Figure S41.** <sup>29</sup>Si-NMR spectrum of poly(D-IMCI-*co*-ITPPA) (Table 3, entry 6).

**Figure S42.** Plots of fluorescence intensity vs water fraction in THF/water mixture (0.01 mg/mL) (A) Poly(D-IMCI-*co*-ITPPA) (Table 3, entry 4), (B) Poly(D-IMCI-*co*-ITPPA) (Table 3, entry 5), (C) Poly(D-IMCI-*co*-ITPPA) (Table 3, entry 6), (D) Poly(D-IMCI-*co*-ITPPA) (Table 3, entry 8), (F) Poly(L-IMCI-*co*-ITPPA) (Table 3, entry 9), (G) Poly(L-IMCI-*co*-ITPPA) (Table 3, entry 10), (H) Poly(L-IMCI-*co*-ITPPA)

(Table 3, entry 11) and (I) Poly(L-IMCI-*co*-ITPPA) (Table 3, entry 13) (conditions: EX wavelength: 290 nm, EX slit: 5 nm, EM slit: 5 nm, 700 V).

**Figure S43.** UV absorption and transmittance spectra of (a) baseline, (b) ITPPA, (c) Poly(ITPPA) (Table 2, entry 8), (d-g) (Poly(D-IMCI-*co*-ITPPA)s (Table 3, entries 4–8) and (h-l) Poly(L-IMCI-*co*-ITPPA)s (Table 3, entries 9–13) in THF.

**Figure S44.** CD spectra of poly(D-IMCI) (Table 3, entry 2) and poly(L-IMCI) (Table 3, entry 3).

**Figure S45.** MALDI-TOF mass spectrum of EPI oligomer obtained by the binary  $[\text{Ph}_3\text{C}][\text{B}(\text{C}_6\text{F}_5)_4]/\text{Et}_3\text{SiH}$  system.

**Figure S46.** GPC curve of Poly(EPI) by cationic catalyst  $[\text{Ph}_3\text{C}][\text{B}(\text{C}_6\text{F}_5)_4]$  in Table 1, entry 1.

**Figure S47.** GPC curve of Poly(EPI) by cationic catalyst  $[(\text{Et}_3\text{Si})_2\text{H}][\text{B}(\text{C}_6\text{F}_5)_4]$  in Table 1, entry 2.

**Figure S49.** GPC curve of  $\text{Et}_3\text{Si}$ -end-functionalized poly(EPI) in Table 1, entry 3.

**Figure S49.** GPC curve of  $\text{Et}_3\text{Si}$ -end-functionalized poly(EPI) in Table 1, entry 4.

**Figure S49.** GPC curve of  $\text{Et}_3\text{Si}$ -end-functionalized poly(EPI) in Table 1, entry 5.

**Figure S50.** GPC curve of  $\text{Et}_3\text{Si}$ -end-functionalized poly(EPI) in Table 1, entry 6.

**Figure S51.** GPC curve of  $\text{Et}_3\text{Si}$ -end-functionalized poly(EPI) in Table 1, entry 7.

**Figure S52.** GPC curve of  $\text{Et}_3\text{Si}$ -end-functionalized poly(EPI) in Table 1, entry 8.

**Figure S53.** GPC curve of  $\text{Et}_3\text{Si}$ -End-Functionalized Poly(EPI) in Table 1, entry 9.

**Figure S54.** GPC curve of  $\text{Et}_3\text{Si}$ -end-functionalized poly(EPI) in Table 1, entry 10.

**Figure S55.** GPC curve of  $\text{Et}_3\text{Si}$ -end-functionalized poly(EPI) in Table 1, entry 11.

**Figure S56.** GPC curve of  $\text{Et}_3\text{Si}$ -end-functionalized poly(EPI) in Table 1, entry 12.

**Figure S57.** GPC curve of  $\text{Et}_3\text{Si}$ -end-functionalized poly(EPI) in Table 1, entry 13.

**Figure S58.** GPC curve of  $\text{Et}_3\text{Si}$ -end-functionalized poly(EPI) in Table 1, entry 14.

**Figure S59.** GPC curve of  $\text{Et}_3\text{Si}$ -end-functionalized poly(EPI) in Table 1, entry 15.

**Figure S60.** GPC curve of  $\text{Et}_3\text{Si}$ -end-functionalized poly(EPI) in Table 1, entry 16.

**Figure S61.** GPC curve of  $\text{Et}_3\text{Si}$ -end-functionalized poly(EPI) in Table 1, entry 17.

**Figure S62.** GPC curve of Et<sub>3</sub>Si-end-functionalized poly(EPI) in Table 1, entry 18.

**Figure S63.** GPC curve of PhMe<sub>2</sub>Si-end-functionalized poly(EPI) in Table 2, entry 1.

**Figure S64.** GPC curve of (4-<sup>i</sup>PrC<sub>6</sub>H<sub>4</sub>)Me<sub>2</sub>Si-end-functionalized poly(EPI) in Table 2, entry 2.

**Figure S65.** GPC curve of Ph<sub>3</sub>Si-end-functionalized poly(EPI) in Table 2, entry 3.

**Figure S66.** GPC curve of <sup>i</sup>Pr<sub>3</sub>Si -end-functionalized poly(EPI) in Table 2, entry 5.

**Figure S67.** GPC curve of (OEt)<sub>3</sub>Si-end-functionalized poly(EPI) in Table 2, entry 6.

**Figure S68.** GPC curve of (OEt)<sub>3</sub>Si-end-functionalized poly(EPI) in Table 2, entry 7.

**Figure S69.** GPC curve of Et<sub>3</sub>Si-end-functionalized poly(ITPP) in Table 2, entry 8.

**Figure S70.** GPC curve of Et<sub>3</sub>Si-end-functionalized poly(ITPPA) in Table 2, entry 9.

**Figure S71.** GPC curve of Et<sub>3</sub>Si-end-functionalized poly(D-IMCI) in Table 2, entry 10

**Figure S72.** GPC curve of PhSi-end-functionalized star poly(EPI) in Table 3, entry 1.

**Figure S73.** GPC curve of C<sub>6</sub>H<sub>3</sub>-1,3,5-(Me<sub>2</sub>Si)<sub>3</sub>-end-functionalized poly(D-IMCI) in Table 3, entry 2.

**Figure S74.** GPC curve of C<sub>6</sub>H<sub>3</sub>-1,3,5-(Me<sub>2</sub>Si)<sub>3</sub>-end-functionalized poly(L-IMCI) in Table 3, entry 3.

**Figure S75.** GPC curve of C<sub>6</sub>H<sub>3</sub>-1,3,5-(Me<sub>2</sub>Si)<sub>3</sub>-end-functionalized poly(D-IMCI-*co*-ITPPA) in Table 3, entry 4.

**Figure S76.** GPC curve of C<sub>6</sub>H<sub>3</sub>-1,3,5-(Me<sub>2</sub>Si)<sub>3</sub>-end-functionalized poly(D-IMCI-*co*-ITPPA) in Table 3, entry 5.

**Figure S77.** GPC curve of C<sub>6</sub>H<sub>3</sub>-1,3,5-(Me<sub>2</sub>Si)<sub>3</sub>-end-functionalized poly(D-IMCI-*co*-ITPPA) in Table 3, entry 6.

**Figure S78.** GPC curve of C<sub>6</sub>H<sub>3</sub>-1,3,5-(Me<sub>2</sub>Si)<sub>3</sub>-end-functionalized poly(D-IMCI-*co*-ITPPA) in Table 3, entry 7.

**Figure S79.** GPC curve of C<sub>6</sub>H<sub>3</sub>-1,3,5-(Me<sub>2</sub>Si)<sub>3</sub>-end-functionalized poly(D-IMCI-*co*-ITPPA) in Table 3, entry 8.

**Figure S80.** GPC curve of C<sub>6</sub>H<sub>3</sub>-1,3,5-(Me<sub>2</sub>Si)<sub>3</sub>-end-functionalized poly(L-IMCI-*co*-ITPPA) in Table 3, entry 9.

**Figure S81.** GPC curve of C<sub>6</sub>H<sub>3</sub>-1,3,5-(Me<sub>2</sub>Si)<sub>3</sub>-end-functionalized poly(L-IMCI-*co*-ITPPA) in Table 3, entry 10.

**Figure S82.** GPC curve of C<sub>6</sub>H<sub>3</sub>-1,3,5-(Me<sub>2</sub>Si)<sub>3</sub>-end-functionalized poly(L-IMCI-*co*-ITPPA) in Table 3, entry 11.

**Figure S83.** GPC curve of C<sub>6</sub>H<sub>3</sub>-1,3,5-(Me<sub>2</sub>Si)<sub>3</sub>-end-functionalized poly(L-IMCI-*co*-ITPPA) in Table 3, entry 12.

**Figure S84.** GPC curve of C<sub>6</sub>H<sub>3</sub>-1,3,5-(Me<sub>2</sub>Si)<sub>3</sub>-end-functionalized poly(L-IMCI-*co*-ITPPA) in Table 3, entry 13.

## COMPUTATIONALMETHODS

### Density functional calculations

**Figure S85.** Optimized structures of the adduct between Ph<sub>3</sub>C<sup>+</sup> and a substrate **a** (Ph<sub>3</sub>C-(a)<sub>1</sub><sup>+</sup>) and the transition state (TS<sub>A</sub>) for the A<sup>+</sup> formation activated by Ph<sub>3</sub>C<sup>+</sup>.

**Figure S86.** Free energy profile for the polymerization initiated by Ph<sub>3</sub>C<sup>+</sup>.

**Figure S87.** Free energy profile for the polymerization initiated by A<sup>+</sup>.

**Figure S88.** Optimized structures of stationary points in the polymerization initiated by A<sup>+</sup>.

**Figure S89.** Optimized structures of stationary points in the polymerization initiated by Ph<sub>3</sub>C<sup>+</sup>.

**Figure S90.** DSC curve of PhSi-end-functionalized **star** poly(EPI) in Table 3, entry 1.

**Figure S91.** DSC curve of Ph<sub>3</sub>Si-end-functionalized poly(EPI) in Table 2, entry 3.

**Figure S92.** DSC curve of <sup>i</sup>Pr<sub>3</sub>Si-end-functionalized poly(EPI) in Table 2, entry 5.

**Figure S93.** DSC curve of (OEt)<sub>3</sub>Si-end-functionalized poly(EPI) in Table 2, entry 6.

**Figure S94.** DSC curve of triethylsilane-end-capped Poly(D-IMCI) Table 2, entry 9.

**Figure S95.** DSC curve of triethylsilane-end-capped Poly(L-IMCI) in Table 2, entry 10.

**Figure S96.** DSC curve of silane-end-capped star Poly(D-IMCI) in Table 3, entry 2.

**Figure S97.** DSC curve of silane-end-capped star Poly(L-IMCI) in Table 3, entry 3.

**Figure S98.** AFM image of silane-end-capped star Poly(L-IMCI) in Table 3, entry 3.

**Figure S99.** SEM image of silane-end-capped star Poly(L-IMCI) in [Table 3, entry 3](#).

**Figure S100.** The *in situ*  $^1\text{H}$  NMR spectra of the polymerization of EPI by the  $[\text{Ph}_3\text{C}][\text{B}(\text{C}_6\text{F}_5)_4]/\text{PhSiH}_3$  binary system under the molar ratio of  $[\text{EPI}]/\{[\text{Ph}_3\text{C}][\text{B}(\text{C}_6\text{F}_5)_4]\}/[\text{PhSiH}_3]$  as 10:1:10 at room temperature in  $d^8$ -THF.

**Figure S101.** The *in situ*  $^{29}\text{Si}$  NMR spectra of the polymerization of EPI by the  $[\text{Ph}_3\text{C}][\text{B}(\text{C}_6\text{F}_5)_4]/\text{PhSiH}_3$  binary system under the molar ratio of  $[\text{EPI}]/\{[\text{Ph}_3\text{C}][\text{B}(\text{C}_6\text{F}_5)_4]\}/[\text{PhSiH}_3]$  as 10:1:10 at room temperature in  $d^8$ -THF.

**Figure S102.** The reaction of  $[\text{Ph}_3\text{C}][\text{B}(\text{C}_6\text{F}_5)_4]$  and  $\text{PhSiH}_3$  under the molar ratio of  $[\text{EPI}]/\{[\text{Ph}_3\text{C}][\text{B}(\text{C}_6\text{F}_5)_4]\}/[\text{PhSiH}_3]$  as 10:1:10 at room temperature in 1h.

## References

## EXPERIMENTAL SECTION

### Materials

All manipulations of air and moisture-sensitive compounds were performed under a dry and oxygen free nitrogen atmosphere by using schlenk techniques or under nitrogen atmosphere in an Mbraunglovebox. Nitrogen (Beijing AP beifen gases Industrial Co.Ltd.) was purified through a dry clean column (4A molecular sieves, Dalian Replete Science and Technology Co.Ltd.) and a gas clean column (Dalian Replete Science and Technology Co.Ltd.). The nitrogen in glovebox was constantly circulated through copper/molecular sieves catalyst unit. The oxygen and moisture concentrations in the glovebox atmosphere were monitored by an  $\text{O}_2/\text{H}_2\text{O}$  Combi-Analyzer (Mbraun) to ensure both were always below 0.1ppm. THF, Hexane, Toluene, Chlorobenzene, Dichlorobenzene and 1,1,2,2-tetrachloroethane were purified by a solvent purification system (SPS-800, Mbraun), and dried over fresh Na Chips in the glovebox.  $[\text{Ph}_3\text{C}][\text{B}(\text{C}_6\text{F}_5)_4]$ ,  $[\text{PhMe}_2\text{NH}][\text{B}(\text{C}_6\text{F}_5)_4]$ , and  $\text{B}(\text{C}_6\text{F}_5)_3$  were purchased from Tosoh finechem corporation and used without purification. All Silane monomers were also purchased from Tosoh Finechem Corporation and dried with  $\text{CaH}_2$  and Distilled.

Isocyanide monomers were synthesized according to literatures.<sup>[1]</sup> The 1,3,5-tris(dimethylsilyl)benzene also synthesized according to literature.<sup>[2]</sup> The deuterated solvents benzene- $d_6$  (99.6 atom% D) and Chloroform- $d_1$  (99.8 atom% D) were obtained from Cambridge Isotope.

### General Methods



$^1\text{H}$  and  $^{13}\text{C}$  NMR spectra were recorded on a BrukerAvance (III-HD 400 MHz) Spectrometer. The molecular Weights and molecular weight distributions of EPI Polymers were determined against polystyrene standard at 25°C by GPC on waters HPLC-515 apparatus,  $\text{CHCl}_3$  was employed as the eluent at a flow rate of 1 ml/min. The molecular Weights and molecular weight distributions of the D-(or L-) IMCI and ITPA Polymers were determined against polystyrene standard at 25 °C by GPC on waters HPLC-8320GPC apparatus, THF was employed as the eluent at a flow rate of 1 mL/min.

FT-IR spectra were recorded on a thermo IS5 FT-IR system using KBr Pellets at room temperature. The UV-Vis spectra were recorded on a HITACHI F-7000 Fluorescence spectrometer. Quartz cells with 10.0 mm length were used in UV-Vis and fluorescence measurement, and the slit widths were set at 5.0 nm for both excitation and emission during the fluorescence measurement. Circular dichroism spectra were collected on a Jasco J-810 and quartz cell length was 1.0 nm. Optical rotations were measured on a Kruss P8000-T polarimeter using a 0.5 cm cell with a Na 589 nm filter. High resolution mass spectra were collected on an Agilent 6520 Accurate-mass Q-TOF LC/MS.

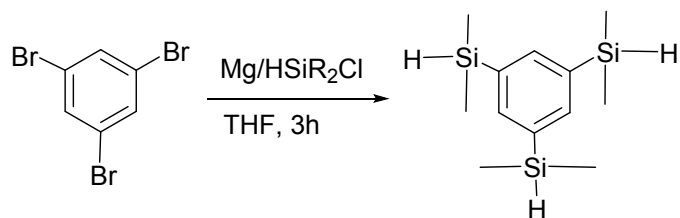

**Scheme S1.** Synthesis of 1,3,5-Tris(dimethylsilyl) Benzene

**Synthesis of 1,3,5-tris(dimethylsilyl) benzene:** The 1,3,5-tris(dimethylsilyl) benzene was synthesized according to the literature procedures.<sup>[3]</sup> To a mixture of dimethylchlorosilane (4.73 g, 50.0 mmol) and magnesium (1.22 g, 50.0 mmol) in dry THF (15 mL) was added a solution of 1,3,5-tribromobenzene (3.15 g, 100 mmol) in THF (10 mL). The rate of the addition was adjusted to maintain a reflux. When the addition was finished the reaction was heated under reflux for 3 h. The volatiles were removed in vacuo and the product extracted from the solid residue of hexane ( $3 \times 20$  mL). The solvent was removed in vacuo. The product was purified by distillation under reduced pressure, Yield 75%.  $^1\text{H}$ -NMR ( $\text{CDCl}_3$ ): 0.21 (18H, d,  $-\text{CH}_3$ ,  $J \frac{1}{4} 3$  Hz), 4.29 (3H, septet,  $\text{Si-H}$ ,  $J \frac{1}{4} 3$  Hz), 7.58 (3H, s,  $\text{H-Ar}$ ).

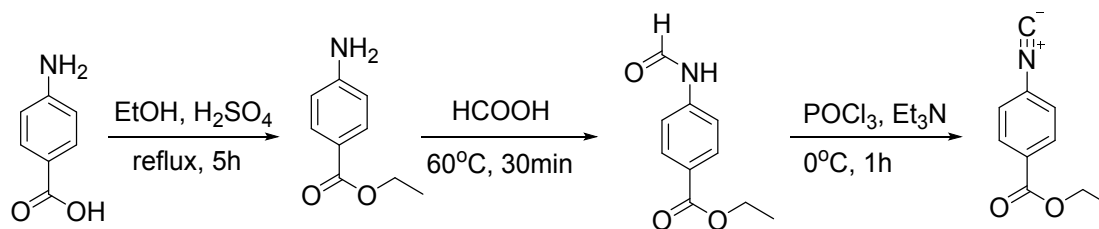

**Scheme S2.** Synthesis of 4-Ethoxycarbonyl Phenyl Isocyanides (**EPI**)

**Synthesis of ethyl-4-aminobenzoate:** To a solution of 4-aminobenzoic acid (5.26 g, 30.0 mmol) in 120 mL of EtOH was slowly added 16.3 mL of aqueous con. $\text{H}_2\text{SO}_4$  (300 mmol) at room temperature. The mixture was refluxed for 7 h, cooled to room temperature, neutralized with a saturated  $\text{K}_2\text{CO}_3$  aqueous solution and extracted with ethyl acetate ( $3 \times 60$  mL), the combined organic phases were washed with brine ( $2 \times 40$  mL), dried over anhydrous  $\text{Na}_2\text{SO}_4$  and concentrated in vacuum, the residue was purified by column chromatography (silica gel, 4:1-2:1 hexane to ethyl acetate, v/v) to afford compound as a white solid (4.35 g, 93% yield).  $^1\text{H}$  NMR (400 MHz,  $\text{CDCl}_3$ ): 1.36 (t,  $J = 7.0$  Hz, 3H), 4.06 (br, 2H), 4.31 (q,  $J = 7.2$  Hz, 2H), 6.63 (d,  $J = 8.8$  Hz, 2H), 7.85 (d,  $J = 8.4$  Hz, 2H).

**Synthesis of ethyl-4-formamidobenzoate:** Compound ethyl 4-aminobenzoate (4.35 g, 26.3 mmol) was dissolved in a formic acid (1.5 mL, 39.5 mmol) the resulting mixture was heated at  $60^\circ\text{C}$  for 30 min. After the reaction mixture was cooled to room temperature, the excess formic acid was removed under reduced pressure, the residue was washed with saturated aqueous  $\text{Na}_2\text{CO}_3$  (25 mL) and filtered, the filter cake was washed twice with water and dried in vacuum to afford crude compound as a white solid (4.71 g, crude), this compound was used directly for the next step without purification.

**Synthesis of 4-ethoxycarbonyl phenyl isocyanide:** Compound ethyl-4-formamidobenzoate (4.71 g, 28.5 mmol) and triethylamine (27.60 mL, 191.0 mmol) were dissolved in dry THF (45 mL) under an atmosphere of nitrogen, after the mixture was cooled to  $0^\circ\text{C}$ ,  $\text{POCl}_3$  (4.50 mL, 48.4 mmol) was added drop wise to the mixture, the resulting mixture was slowly warmed to room temperature and stirred for 1 h, then the reaction mixture was slowly poured into 40 mL saturated aqueous  $\text{Na}_2\text{CO}_3$  and stirred at room temperature for 1 h, the mixture was extracted with  $\text{CH}_2\text{Cl}_2$  ( $3 \times 60$  mL), the combined organic layers were washed with brine, dried over anhydrous  $\text{Na}_2\text{SO}_4$  and concentrated under reduced pressure, the residue was purified by column chromatography (neutral  $\text{Al}_2\text{O}_3$ , 10:1 hexane to ethyl acetate, v/v) to afford the desired compound as brown solid (3.71 g, 87% yield).  $^1\text{H}$  NMR (400

MHz,CDCl<sub>3</sub>): 1.40 (t,  $J$ = 7.2 Hz, 3H), 4.39 (q,  $J$ = 7.2 Hz, 2H), 7.43 (d,  $J$ = 8.4 Hz, 2H), 7.43 (d,  $J$ = 8.4 Hz, 2H), 8.08 (dt,  $J$ = 2.0, 8.8 Hz, 2H); <sup>13</sup>C NMR (100 MHz,CDCl<sub>3</sub>):14.33, 61.66, 126.48, 129.94, 130.88, 131.38, 165.06, 167.10.

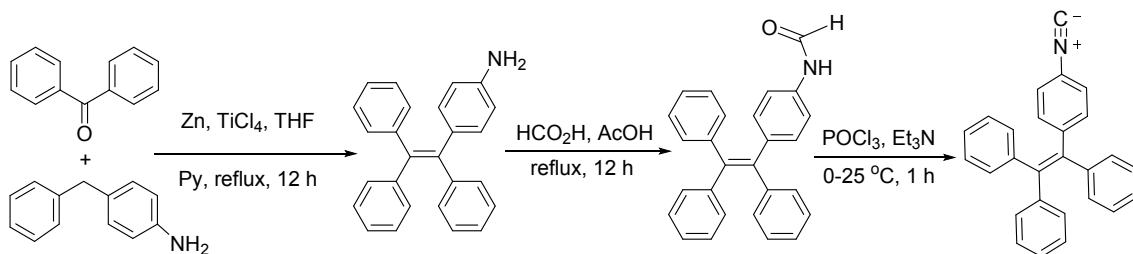

**Scheme S3.** Synthesis of 4-Isocyano-4-(1,1,2-Triphenylvinyl)-1-Phenyl (ITPP)

**Synthesis of (2-(4-aminophenyl)ethene-1,1,2-triyl)tribenzene:** The (2-(4-aminophenyl)ethene-1,1,2-triyl)tribenzene was synthesized by the typical McMurry reaction according to the literature procedures.<sup>[4]</sup> Into a two-necked round-bottom flask (100 mL) with reflux condenser were added of Zinc powder (Zn, 1.49 g, 22.8 mmol) and THF (60 mL). The flask was evacuated and flushed with dry nitrogen three times. After cooling to -15°C, TiCl<sub>4</sub> (4.33 g, 22.8 mmol) was slowly added. The mixture was stirred for 2.5 h at room temperature. After cooling to -5°C, again, Pyridine (1.53 mL, 19.0 mmol) was added and the mixture was stirred for 10 min. Then the solution of benzophenone (1.50 g, 7.6 mmol) and 4-benzylaniline (1.66 g, 9.1 mmol) in THF (40 mL) was added, the mixture was refluxed overnight. Afterwards, K<sub>2</sub>CO<sub>3</sub> solution was added to quench the reaction. After cooling to room temperature, THF was removed by a rotary evaporator. The solution was poured in to water and extracted with DCM. The collected organic layer was dried over anhydrous Na<sub>2</sub>SO<sub>4</sub>. After extraction and evaporation of solvent, the crude product was recrystallized from Methanol. A yellow solid was obtained in 56%. <sup>1</sup>H NMR (400 MHz, CDCl<sub>3</sub>): 7.13–6.99 (m, 17H); 6.85–6.82 (d, 2H); 6.52–6.49 (d, 2H). <sup>13</sup>C NMR (100MHz, CDCl<sub>3</sub>): 114.69, 144.57, 144.52, 144.44, 141.25, 139.87, 135.04, 132.94, 131.89.

**Synthesis of (2-(4-formamidophenyl) ethene-1,1,2-triyl) tribenzene:** Into a 100 mL two-necked flask was added compound (2-(4-aminophenyl)ethene-1,1,2-triyl)tribenzene(1.50 g, 4.3 mmol) and THF (40 mL). After cooling to 0°C, acetic formal anhydride was tardily added by a syringe. The mixture was stirred at room temperature for 2 h. Then the reaction was quenched by the saturated solution of NaHCO<sub>3</sub>. The mixture was extracted with ethyl acetate (EA), and then the collected organic layer was dried over anhydrous Na<sub>2</sub>SO<sub>4</sub>.

and concentrated in Vacuum. The crude product was recrystallized from Methanol. A crude yellow solid was obtained in 82% and used directly for next step.

**Synthesis of 4-Isocyano-4-(1,1,2-Triphenylvinyl)-1-Phenyl(ITPP):** Compound (2-(4-formamidophenyl) ethene-1,1,2-triyl) tribenzene(1.39 g, 3.7 mmol) and triethylamine (3.50 mL, 24.8 mmol) were dissolved in dry THF (20 mL) under an atmosphere of nitrogen, after the mixture was cooled to 0°C, POCl<sub>3</sub> (0.60 mL, 6.3 mmol) was added drop wise to the mixture, the resulting mixture was slowly warmed to room temperature and stirred for 1h, then the reaction mixture was slowly poured into 15 mL saturated aqueous Na<sub>2</sub>CO<sub>3</sub> and stirred at room temperature for 1 h, the mixture was extracted with CH<sub>2</sub>Cl<sub>2</sub> (3 × 20 mL), the combined organic layers were washed with brine, dried over anhydrous Na<sub>2</sub>SO<sub>4</sub> and concentrated under reduced pressure, the residue was purified by column chromatography (neutral Al<sub>2</sub>O<sub>3</sub>, 30:1 hexane to ethyl acetate, v/v) to afford the desired compound as light yellow solid (0.84g, 63% yield). <sup>1</sup>H NMR (400 MHz, CDCl<sub>3</sub>): 7.17–7.10 (m, 11H), 7.21–6.93 (m, 8H); <sup>13</sup>C NMR (101 MHz, CDCl<sub>3</sub>): 167.01, 148.40, 145.13, 145.08, 144.94, 144.78, 141.27, 133.38, 133.15, 132.35, 132.29, 129.09, 129.05, 128.86, 128.12, 126.99, 127.96, 126.88, 125.55.

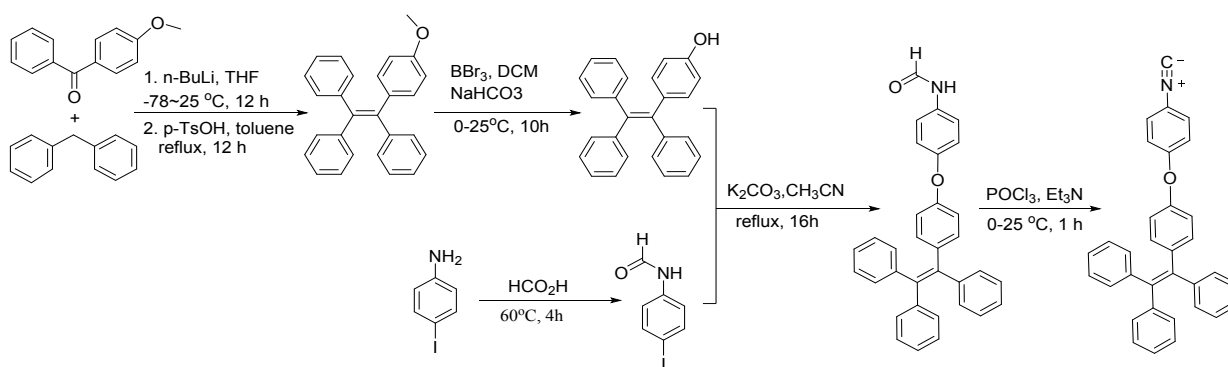

**Scheme S4.** Synthesis of 4-Isocyano-4-(1,1,2-Triphenylvinyl)-1-Phenyl-1-Anisol(ITPPA)

**Synthesis of 4-methoxytetraphenylethene:** Under nitrogen atmosphere, compounddiphenylmethane(8.60 g, 51.0 mmol) was dissolved in 50 mL of dry THF, after the solution was cooled to -78°C, n-BuLi (22.30 mL, 2.5 M in hexane) was added drop wise and the resulting mixture was stirred at -10°C for 2 h, then compound (4-methoxyphenyl)(phenyl)methanone (9.0 g, 42.4 mmol) in 15 mL THF was added drop wise and the mixture was allowed to warmed to room temperature and stirred for 10 h. Then the reaction mixture was quenched with an aqueous solution of ammonium chloride, extracted with CH<sub>2</sub>Cl<sub>2</sub> (3 × 100 mL), the combined organic layers were dried over anhydrous Na<sub>2</sub>SO<sub>4</sub> and evaporated to remove the solvent. The

residue was dissolved in toluene (100 mL), p-toluene sulfonic acid (1.06 g, 6.2 mmol) as catalyst was added, the resulting mixture was refluxed for 10 h. after the reaction mixture was cooled to room temperature, the solvent was removed under reduced pressure, the residue was recrystallized from methanol to afford the desired compound 4-methoxytetraphenylethene as a white solid (14.8 g, 86% yield). <sup>1</sup>H NMR (400 MHz, CDCl<sub>3</sub>): 7.21–7.01 (m, 15H, Ar-*H*), 6.97 (d, *J* = 8.4 Hz, 2H, Ar-*H*), 6.67 (d, *J* = 8.6 Hz, 2H, Ar-*H*), 3.77 (s, 3H, CH<sub>3</sub>).

**Synthesis of 4-hydroxytetraphenylethene:** Two-necked flask containing compound 4-methoxytetraphenylethene (8.25 g, 22.7 mmol) and dried DCM (120 mL) was cooled to -20°C, and BBr<sub>3</sub> (17.10 g, 68.2 mmol) was slowly added. The mixture was warmed to room temperature and allowed standing for 8 h, and then poured into saturated aqueous solution of NaHCO<sub>3</sub>. The organic phase was dried over Na<sub>2</sub>SO<sub>4</sub>, and the crude product was recrystallized from petroleum ether to obtain white solid (7.65 g, 97% yield). <sup>1</sup>H NMR (400 MHz, CDCl<sub>3</sub>): 7.01–7.13 (m, 15H, Ar-*H*), 6.90 (d, *J* = 8.0 Hz, 2H, Ar-*H*), 6.56 (d, *J* = 8.0 Hz, 2H, Ar-*H*), 4.60 (s, 1H, O-*H*). <sup>13</sup>C NMR (100 MHz, CDCl<sub>3</sub>): 154.08, 144.12, 144.01, 140.54, 140.34, 136.54, 132.87, 131.49, 131.46, 127.84, 127.74, 126.52, 126.4, 114.72.

**Synthesis of N-(4-iodophenyl) formamide:** The synthetic procedure was the same with that of compound (2-(4-formamidophenyl) ethene-1, 1, 2-triyl) tribenzene, and the crude product was directly used for the next step without further purification (11.5g, 92% yield).

**Synthesis of N-(4'-(1,2,2-triphenylvinyl)-[1-phenyl-1-anisol]-4-yl) formamide:** Compound N-(4-iodophenyl) formamide (4.40 g, 17.8 mmol), 4-hydroxytetraphenylethene (5.64 g, 16.2 mmol) and K<sub>2</sub>CO<sub>3</sub> (3.26 g, 24.3 mmol) in 100 mL CH<sub>3</sub>CN were reflux overnight (16 h). After the reaction completed, water was added and the resulting mixture was extracted with ethyl acetate. The organic layer was collected, washed with water and brine, dried over anhydrous MgSO<sub>4</sub> and evaporated. The crude product was washed with Petroleum ether to obtain a yellow solid (8.5 g, 84.7% yield) and directly used for next the step without further purification.

**Synthesis of 4-isocyano-4'-(1,2,2-triphenylvinyl)-1-phenyl-1-anisol (ITPPA):** The synthetic procedure was the same with that of compound 4-Isocyano-4-(1, 1, 2-Triphenylvinyl)-1-Phenyl (ITPP). (Weight solid, 83% yield). <sup>1</sup>H NMR (400 MHz, CDCl<sub>3</sub>): 7.03–7.15 (m, 17H), 7.32 (d, *J* = 8.0 Hz, 2H), 7.40 (d, *J* = 8.4 Hz, 2H), 7.56 (dt, *J* = 1.6, 8.4 Hz, 2H); <sup>13</sup>C NMR (100 MHz, CDCl<sub>3</sub>): 125.50, 126.36, 126.69, 126.73, 126.76, 126.83, 127.81, 127.84, 127.90, 127.95, 131.43, 131.46, 131.50, 132.15, 137.06, 140.28, 141.75, 141.99, 143.64, 143.69, 144.02, 164.69.

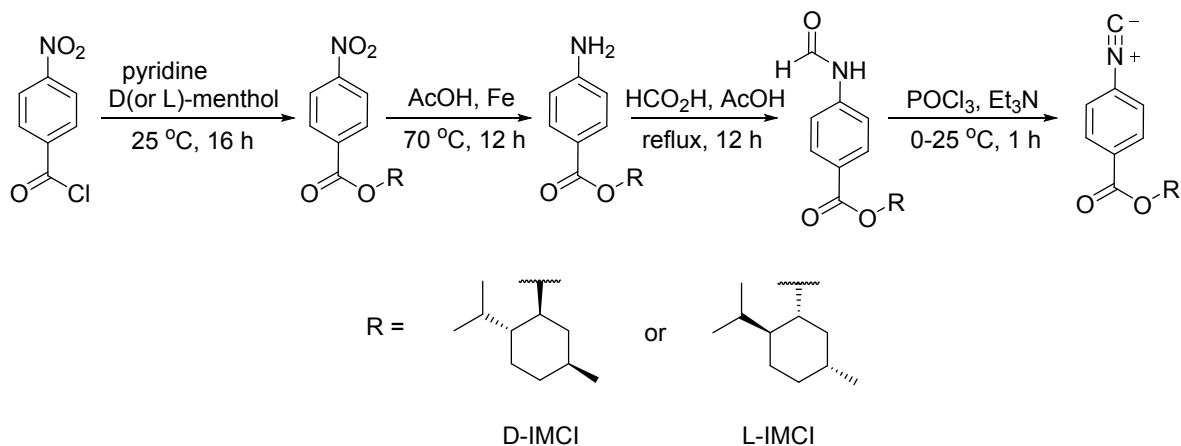

**Scheme S5.** Synthesis of (*1S,2R,5S*)-2-Isopropyl-5-Methyleycyclohexyl-4-Isocyanobezoate (**D-IMCI**) and (*1R,2S,5R*)-2-Isopropyl-5-Methyleycyclohexyl-4-Isocyanobezoate (**L-IMCI**)

**Synthesis of (*1S,2R,5S*)-2-isopropyl-5-methyleycyclohexyl-4-nitrobenzoate:** Under nitrogen atmosphere, compound 4-nitrobenzoyl chloride (1.80 g, 9.7 mmol) was dissolved in dry pyridine (20 mL), then D-menthol (1.50 g, 9.7 mmol) was added in one portion and the resulting mixture was stirred at room temperature for 16 h, after removal of pyridine under reduced pressure, the residue was dissolved in dichloromethane (30 mL) and washed with 1N HCl, saturated  $\text{NaHCO}_3$  aqueous solution and brine, the separated organic layer was dried over anhydrous  $\text{Na}_2\text{SO}_4$  and concentrated under reduced pressure, the residue was purified by column chromatography (silica gel, 10:1 hexane to ethyl acetate, v/v) to afford the desired compound (*1S,2R,5S*)-2-isopropyl-5-methyleycyclohexyl-4-nitrobenzoate as a yellow solid (2.40 g, 81% yield)  $^1\text{H}$  NMR (400 MHz,  $\text{CDCl}_3$ ): 0.79 (d,  $J = 7.2$  Hz, 3H), 0.93 (t,  $J = 6.4$  Hz, 6H), 0.88–0.98 (m, 1H), 1.08–1.17 (m, 2H), 1.54–1.62 (m, 2H), 1.74 (d,  $J = 12.4$  Hz, 2H), 1.88–1.95 (m, 1H), 2.12 (d,  $J = 11.6$  Hz, 1H), 4.97 (dt,  $J = 4.4, 11.2$  Hz, 1H), 8.20 (d,  $J = 8.8$  Hz, 2H), 8.28 (d,  $J = 8.4$  Hz, 2H).

**Synthesis of (*1S,2R,5S*)-2-isopropyl-5-methyleycyclohexyl-4-aminobenzoate:** Under nitrogen atmosphere, compound (*1S,2R,5S*)-2-isopropyl-5-methyleycyclohexyl-4-nitrobenzoate (2.40 g, 7.9 mmol) was dissolved in 30 mL of acetic acid, then iron powder (4.4 g, 78.6 mmol) was added in one portion, the resulting mixture was stirred at 70 °C overnight. Then the mixture was filtered and the filter cake was washed with ethyl acetate (20 mL), the filtrate was concentrated under reduced pressure, the residue was purified by column chromatography (silica gel, 4:1 hexane to ethyl acetate, v/v) to afford the desired compound (*1S,2R,5S*)-2-isopropyl-5-methyleycyclohexyl-4-aminobenzoate as yellow solid (1.55 g, 72% yield)  $^1\text{H}$  NMR (400 MHz,  $\text{CDCl}_3$ ): 0.78 (d,  $J = 7.2$  Hz, 3H), 0.90 (d,  $J = 6.8$  Hz, 3H), 0.91 (d,  $J = 6.4$  Hz, 3H), 0.85–0.96 (m, 1H),

1.02–1.14 (m, 2H), 1.48–1.54 (m, 2H), 1.69–1.72 (m, 2H), 1.94–1.98 (m, 1H), 2.09–2.12 (m, 1H), 4.04 (s, 2H), 4.87 (dt,  $J = 4.4, 10.8$  Hz, 1H), 6.63 (d,  $J = 8.4$  Hz, 2H), 7.85 (d,  $J = 8.8$  Hz, 2H).

**Synthesis of (*1S,2R,5S*)-2-isopropyl-5-methylcyclohexyl 4-formamidobenzoate:** Compound (*1S,2R,5S*)-2-isopropyl-5-methylcyclohexyl-4-aminobenzoate (1.55 g, 5.6 mmol) was dissolved in a mixture of formic acid (16 mL) and acetic acid (3 mL), the resulting mixture was refluxed overnight. After the reaction mixture was cooled to room temperature, the solvents were removed under reduced pressure, the residue was washed with saturated aqueous  $\text{Na}_2\text{CO}_3$  (10 mL) and filtered, the filter cake was washed twice with water and dried in vacuum to afford crude compound (*1S,2R,5S*)-2-isopropyl-5-methylcyclohexyl 4-formamidobenzoate as a white solid (1.70 g, crude), this compound was used directly for the next step without purification.

**Synthesis of (*1S,2R,5S*)-2-isopropyl-5-methylcyclohexyl 4-isocyanobenzoate:** Compound (*1S,2R,5S*)-2-isopropyl-5-methylcyclohexyl 4-formamidobenzoate (1.70 g, crude) and triethylamine (5.2 mL, 37.5 mmol) were dissolved in dry THF (15 mL) under an atmosphere of nitrogen, after the mixture was cooled to 0°C,  $\text{POCl}_3$  (0.90 mL, 9.5 mmol) was added drop wise to the mixture, the resulting mixture was slowly warmed to room temperature and stirred for 1.5 h, then the reaction mixture was slowly poured into 20 mL saturated aqueous  $\text{Na}_2\text{CO}_3$  and stirred at room temperature for 1 h, the mixture was extracted with DCM ( $3 \times 20$  mL), the combined organic layers were washed with brine, dried over anhydrous  $\text{Na}_2\text{SO}_4$  and concentrated under reduced pressure, the residue was purified by column chromatography (neutral  $\text{Al}_2\text{O}_3$ , 10:1 hexane to ethyl acetate, v/v) to afford the desired compound (*1S,2R,5S*)-2-isopropyl-5-methylcyclohexyl 4-isocyanobenzoate as a black syrup (1.35 g, 81% yield for two steps)  $^1\text{H}$  NMR (400 MHz,  $\text{CDCl}_3$ ): 0.77 (d,  $J = 6.8$  Hz, 3H), 0.91 (dd,  $J = 5.6, 6.8$  Hz, 6H), 0.86–0.96 (m, 1H), 1.05–1.17 (m, 2H), 1.50–1.59 (m, 2H), 1.70–1.74 (m, 2H), 1.86–1.94 (m, 1H), 2.07–2.12 (m, 1H), 4.93 (dt,  $J = 4.4, 10.8$  Hz, 1H), 7.43 (d,  $J = 8.4$  Hz, 2H), 8.07 (dt,  $J = 2.0, 8.8$  Hz, 2H);  $^{13}\text{C}$  NMR (100 MHz,  $\text{CDCl}_3$ ): 16.60, 20.82, 22.10, 23.71, 26.66, 31.53, 34.32, 40.98, 47.30, 75.75, 126.48, 129.88, 130.90, 131.74, 164.58, 167.05.

**Synthesis of (*1R,2S,5R*)-2-isopropyl-5-methylcyclohexyl 4-nitrobenzoate:** was the same with that of (*1S,2R,5S*)-2-isopropyl-5-methylcyclohexyl 4-isocyanobenzoate.

**Synthesis of (*1R,2S,5R*)-2-isopropyl-5-methylcyclohexyl 4-aminobenzoate:** (yellow solid, 83% yield).  $^1\text{H}$  NMR (400 MHz,  $\text{CDCl}_3$ ): 0.79 (d,  $J = 6.8$  Hz, 3H), 0.93 (t,  $J = 6.2$  Hz, 6H), 0.88–0.98 (m, 1H), 1.08–1.19 (m, 2H), 1.54–1.61 (m, 2H), 1.71–1.78 (m, 2H), 1.85–1.97 (m, 1H), 2.13 (d,  $J = 12.0$  Hz, 1H), 4.97 (dt,  $J = 4.4, 10.8$  Hz, 1H), 8.20 (d,  $J = 9.2$  Hz, 2H), 8.28 (d,  $J = 8.8$  Hz, 2H).

**Synthesis of (1*R*,2*S*,5*R*)-2-isopropyl-5-methylcyclohexyl 4-formamidobenzoate:** (yellow oil, 72% yield). <sup>1</sup>H NMR (400 MHz, *d*<sub>6</sub>-DMSO): 0.73 (d, *J* = 6.8 Hz, 3H), 0.87 (t, *J* = 7.4 Hz, 6H), 0.82–0.92 (m, 1H), 0.97–1.09 (m, 2H), 1.43–1.49 (m, 2H), 1.62–1.66 (m, 2H), 1.82–1.89 (m, 1H), 1.92–1.95 (m, 1H), 4.72 (dt, *J* = 4.4, 10.8 Hz, 1H), 5.92 (s, 2H), 6.56 (d, *J* = 8.8 Hz, 2H), 7.62 (d, *J* = 8.8 Hz, 2H).

**Synthesis of (1*R*,2*S*,5*R*)-2-isopropyl-5-methylcyclohexyl 4-isocyanobenzoate:** (black syrup, 80% yield). <sup>1</sup>H NMR (400 MHz, CDCl<sub>3</sub>): 0.78 (d, *J* = 6.8 Hz, 3H), 0.92 (t, *J* = 6.4 Hz, 6H), 0.87–0.90 (m, 1H), 1.04–1.18 (m, 2H), 1.51–1.60 (m, 2H), 1.70–1.76 (m, 2H), 1.86–1.94 (m, 1H), 2.08–2.13 (m, 1H), 4.93 (dt, *J* = 4.4, 11.2 Hz, 1H), 7.43 (d, *J* = 8.4 Hz, 2H), 8.07 (dt, *J* = 2.0, 8.8 Hz, 2H); <sup>13</sup>C NMR (100 MHz, CDCl<sub>3</sub>): 16.63, 20.86, 22.13, 23.74, 26.69, 31.57, 34.35, 41.01, 47.35, 75.81, 126.52, 129.92, 130.94, 131.78, 164.63, 167.03.

**A typical procedure** for the linear polymerization of 4-ethoxycarbonyl phenyl isocyanide (EPI) with Et<sub>3</sub>SiHas end-functionalized agent (Table 1, entry 4). In the glove box, a 50 mL round bottom flask was charged with a solution of [Ph<sub>3</sub>C][B(C<sub>6</sub>F<sub>5</sub>)<sub>4</sub>] (9.22 mg, 10.0 μmol) in chlorobenzene (2 mL), then 11.5 mg (10 equiv.) of triethylsilane was added. After stirring for 5 min, a solution of 4-ethoxycarbonyl phenyl isocyanide (875 mg, 5 mmol) in chlorobenzene (3 mL) was added in one portion. The reaction mixture was stirred at 25°C for 1min, then the flask was taken out of the glove box and the reaction mixture was poured into methanol (100 mL) to precipitate the polymer product, the yellow polymer solid was collected by filtration, and dried in vacuum at 40°C to a constant weight (868 mg, 99% yield), The product obtained is soluble thoroughly in CHCl<sub>3</sub> at 25°C.

**A typical procedure** for the three star random and homocopolymerization of (1*S*,2*R*,5*S*)-2-isopropyl-5-methylcyclohexyl-4-isocyanobenzoate (D-IMCI) with 4-isocyano-4'-(1,2,2-triphenylvinyl)-1-phenyl-1-anisol (ITPPA) with 1,3,5-tris(dimethylsilyl)benzene as core-first functional agent (Table 2, entry 5). In the glove box, a 50 mL round bottom flask was charged with a solution of [Ph<sub>3</sub>C][B(C<sub>6</sub>F<sub>5</sub>)<sub>4</sub>] (7.5 mg, 8.1 μmol) in chlorobenzene (2 mL). Then 1,3,5-tris(dimethylsilyl)benzene (0.68 mg, 2.7 μmol) was added to the bottom, after stirring for 5 min, 10.8 μmol (4 equiv.) of 1,3,5-tris(dimethylsilyl)benzene was added and subsequently, a solution of (1*S*,2*R*,5*S*)-2-isopropyl-5-methylcyclohexyl 4-isocyanobenzoate (77 mg, 0.3 mmol) and 4-isocyano-4'-(1,2,2-triphenylvinyl)-1-biphenyl-1-anisol (121 mg, 0.3 mmol) in chlorobenzene (3 mL) was added, the reaction mixture was stirred at 25°C for 2 min, then the flask was taken out of the glove box and the reaction mixture was poured into methanol (100 mL) to precipitate the copolymer product, the



orange copolymer solid was collected by filtration, and dried in vacuum at 40°C to a constant weight (149 mg, 91% yield). The product obtained is soluble thoroughly in CHCl<sub>3</sub> and THF at 25°C.

### Calculation for the activity of catalyst

$$A = m_{\text{polymer}} / (n_{\text{cat.}} \cdot t)$$

A: the activity of (co)polymerization (g of polymer/(mol<sub>cat.</sub>·h)), m<sub>polymer</sub>: the mass of (co)polymer (g), t: the reaction time of (co)polymerization (h), n<sub>cat.</sub>: molar amount of catalyst (mol).

$$n_{\text{cat.}} = m_{\text{catalyst}} / M_{\text{catalyst}}$$

m<sub>catalyst</sub>: the mass of catalysts (g), and M<sub>catalysts</sub>: the relative molecular weight of catalyst.

### Calculation of the IMCI contents of the copolymers

The IMCI contents of the copolymers were calculated from the <sup>1</sup>H NMR spectra according to the following formula

$$\omega(\text{mol}\%)_{\text{IMCI}} = \{[23(I_{\text{H3}}+I_{\text{H4}})]/[19(I_{\text{H1}}+I_{\text{H2}}+I_{\text{H3}}+I_{\text{H4}})]\} \times 100$$

In which I<sub>H1</sub> is the integration of the peak at 7.05 ppm which assigned to the aryl protons of ITPPA units and the β-H of the aryl ring of IMCI units. I<sub>H2</sub> is the integration of the peak at 5.76 ppm which assigned to the α-H of the aryl ring of IMCI units. I<sub>H3</sub> is the integration of the peak at 4.86 ppm ascribed to the proton of the cyclohexyl carbon connected with the oxygen. I<sub>H4</sub> is the integration of the peaks between 0.3 to 2.5 ppm which assigned to the rest protons of the cyclohexyl group as well as the substituted methyl and the isopropyl.

The IMCI contents of poly(D-IMCI-co-ITPA)s and poly(L-IMCI-co-ITPA)s were calculated from the <sup>1</sup>H NMR spectra according to the following formula:

$$\omega(\text{mol}\%)_{\text{IMCI}} = \{[5 \times I_{\text{H4}} - 6(I_{\text{H1}}+I_{\text{H2}}+I_{\text{H3}})]/[12(I_{\text{H1}}+I_{\text{H2}}+I_{\text{H3}})]\} \times 100$$

In which I<sub>H1</sub> is the integration of the peak at 7.05 ppm which assigned to the aryl protons of ITPPA units and the H of the aryl ring of IMCI units. I<sub>H2</sub> is the integration of the peak at 5.76 ppm which assigned to the H of the aryl ring of IMCI and ITPA units. I<sub>H3</sub> is the integration of the peak at 4.86 ppm ascribed to the proton of the cyclohexyl carbon connected with the oxygen and the proton of the isopropyl carbon connected with the

oxygen.  $I_{H4}$  is the integration of the peaks between 0.3 to 2.5 ppm which assigned to the rest protons of the cyclohexyl group as well as the substituted methyl and the isopropyl and the rest protons of the isopropyl.

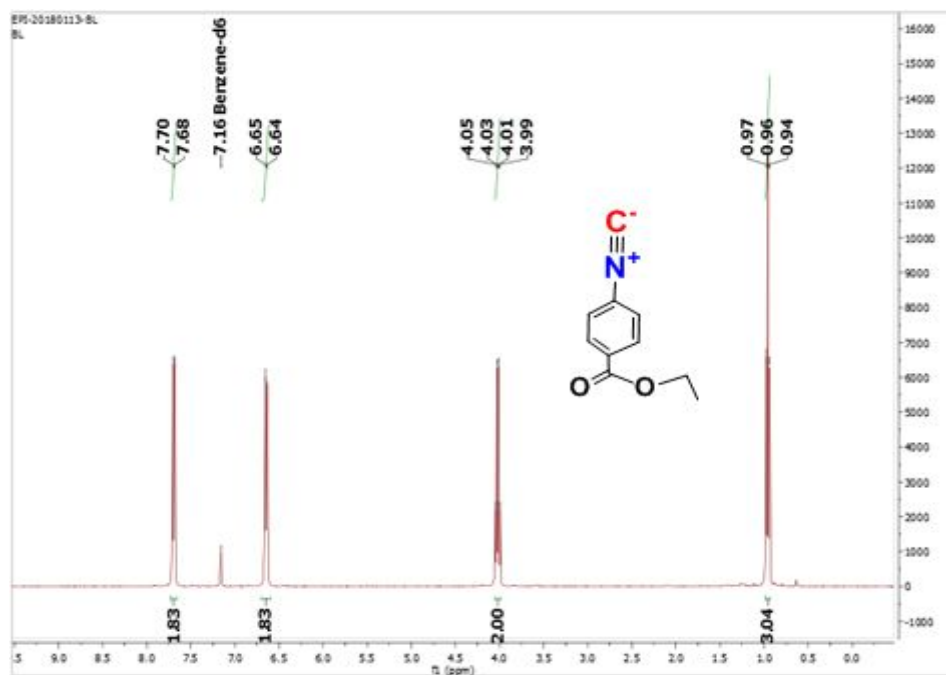

**Figure S1.**  $^1\text{H}$  NMR spectrum of 4-ethoxycarbonyl phenyl isocyanide (a).

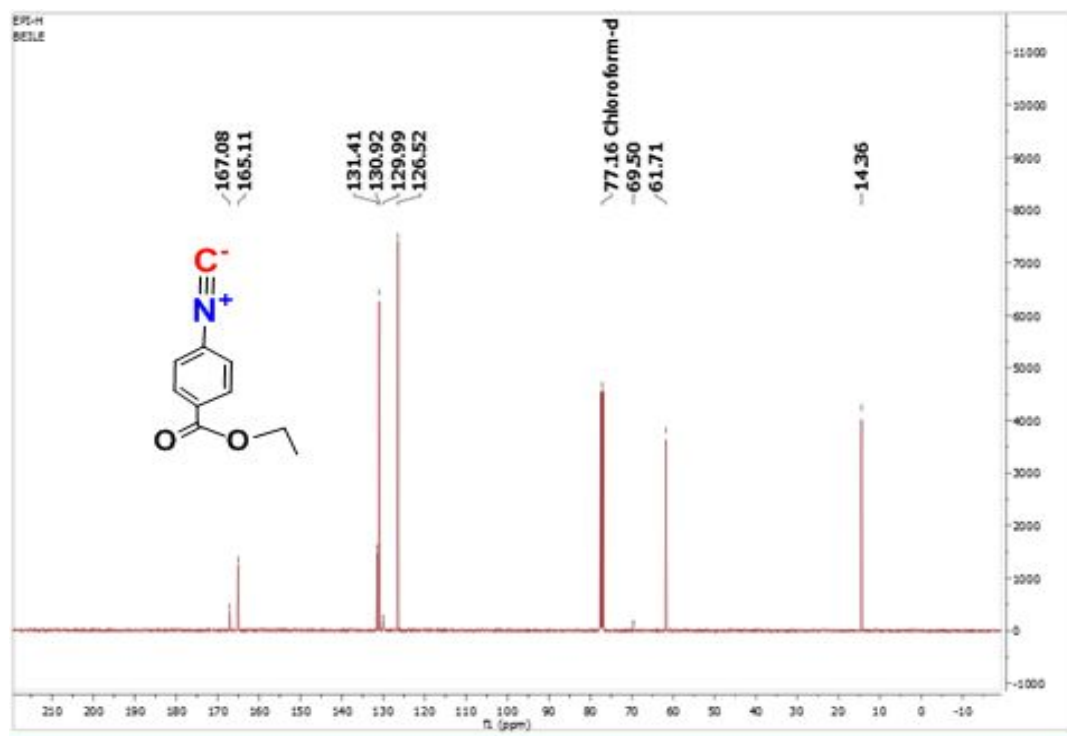

**Figure S2.** <sup>13</sup>C NMR spectrum of 4-ethoxycarbonyl phenyl isocyanide (a).

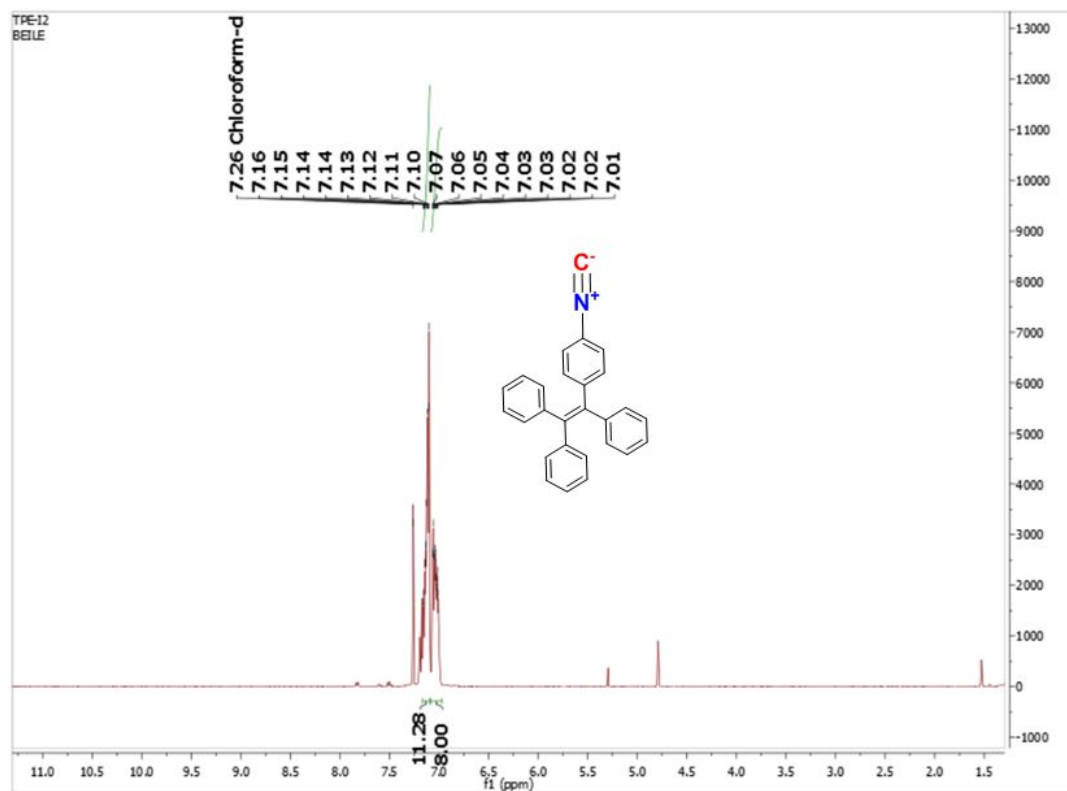

**Figure S3.** <sup>1</sup>H NMR spectrum of 4-isocysno-4-(1,1,2-triphenylvinyl)-1-phenyl (ITPP) (b).

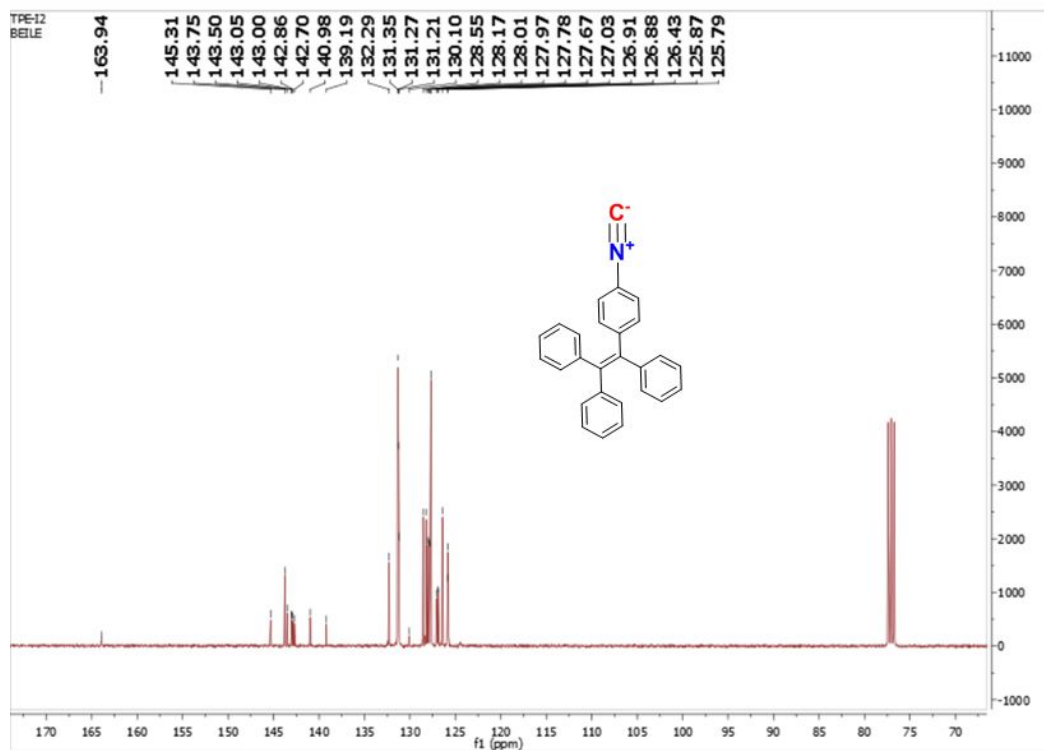

**Figure S4.** <sup>13</sup>C NMR spectrum of 4-isocysno-4-(1,1,2-triphenylvinyl)-1-phenyl (ITPP) (b).

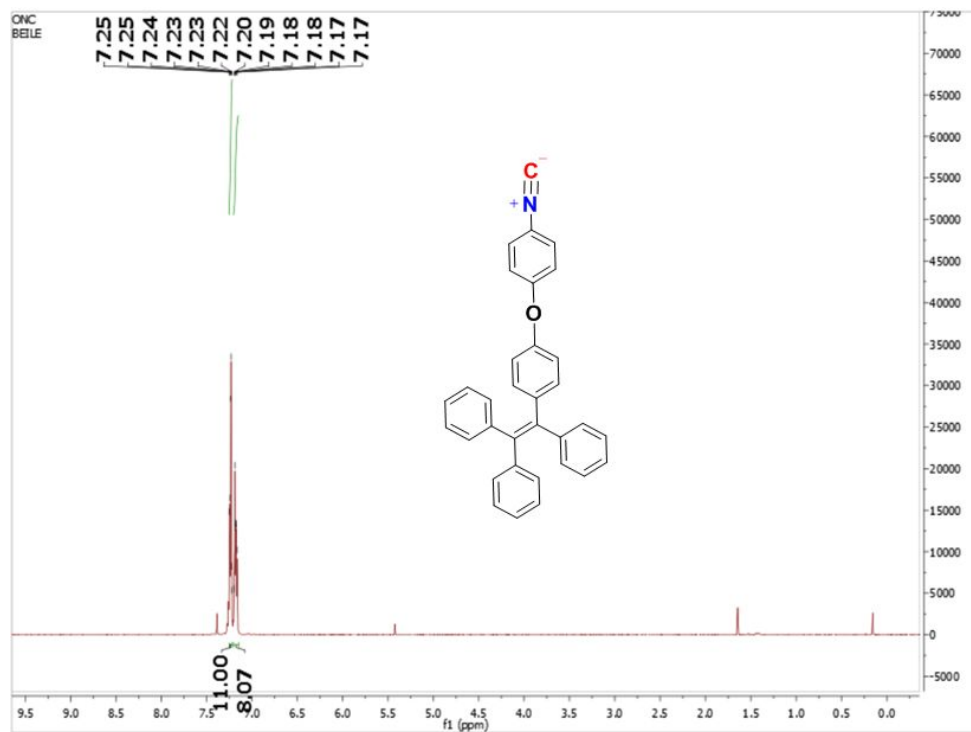

**Figure S5.** <sup>1</sup>H NMR spectrum of 4-isocysno-4-(1,1,2-triphenylvinyl)-1-phenoxy-1-anisol (ITPPA) (c).

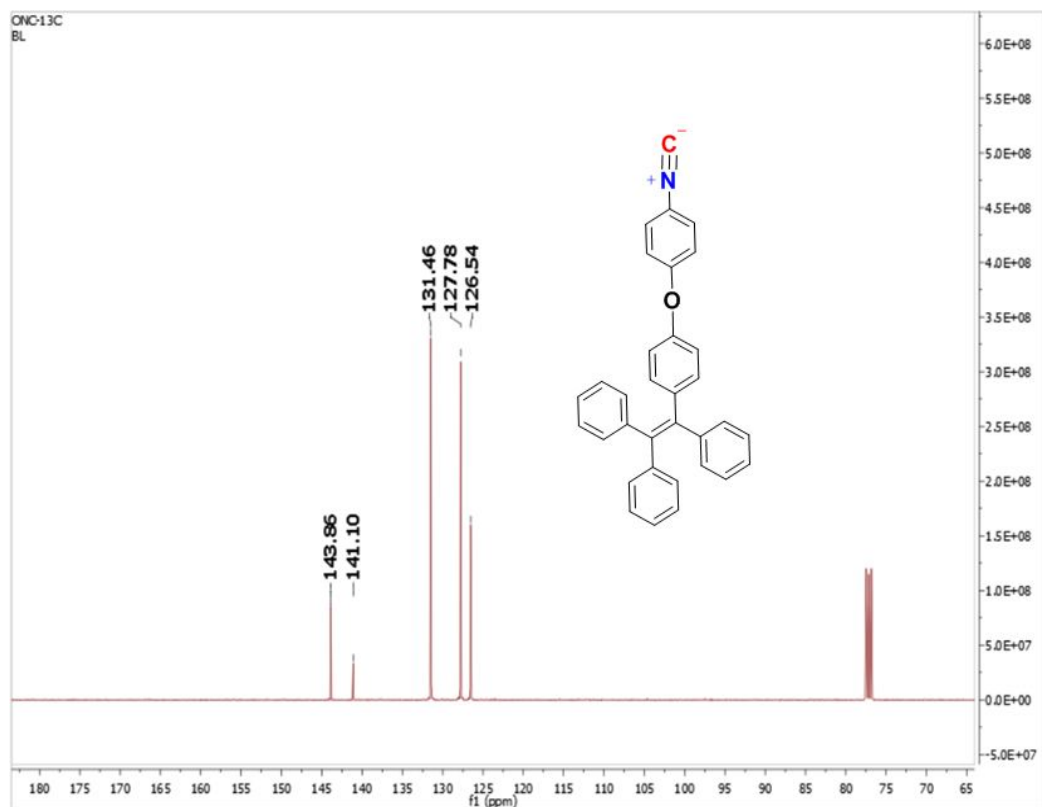

**Figure S6.**  $^{13}\text{C}$  NMR spectrum of 4-isocysno-4-(1,1,2-triphenylvinyl)-1-phenoxy-1-anisol (ITPPA) (c).

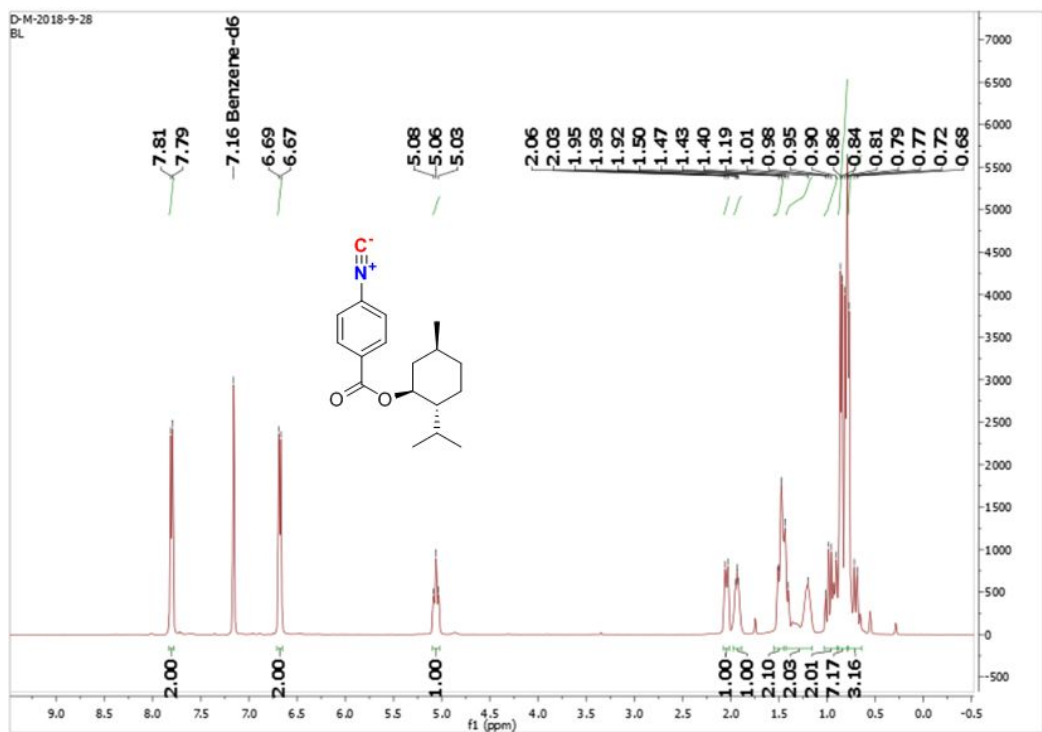

**Figure S7.**  $^1\text{H}$  NMR spectrum of (1*S*,2*R*,5*S*)-2-isopropyl-5-methylcyclohexyl-4-isocyanobenzoate (d).

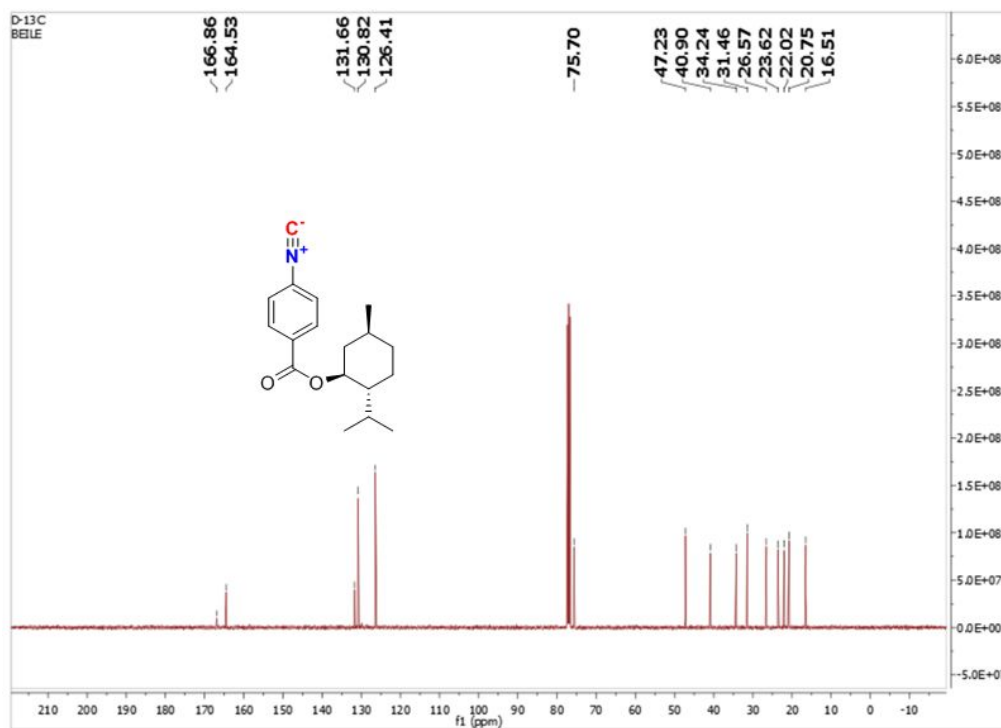

**Figure S8.** <sup>13</sup>C NMR spectrum of (*1S,2R,5S*)-2-isopropyl-5-methylcyclohexyl-4-isocyanobenzoate (**d**).

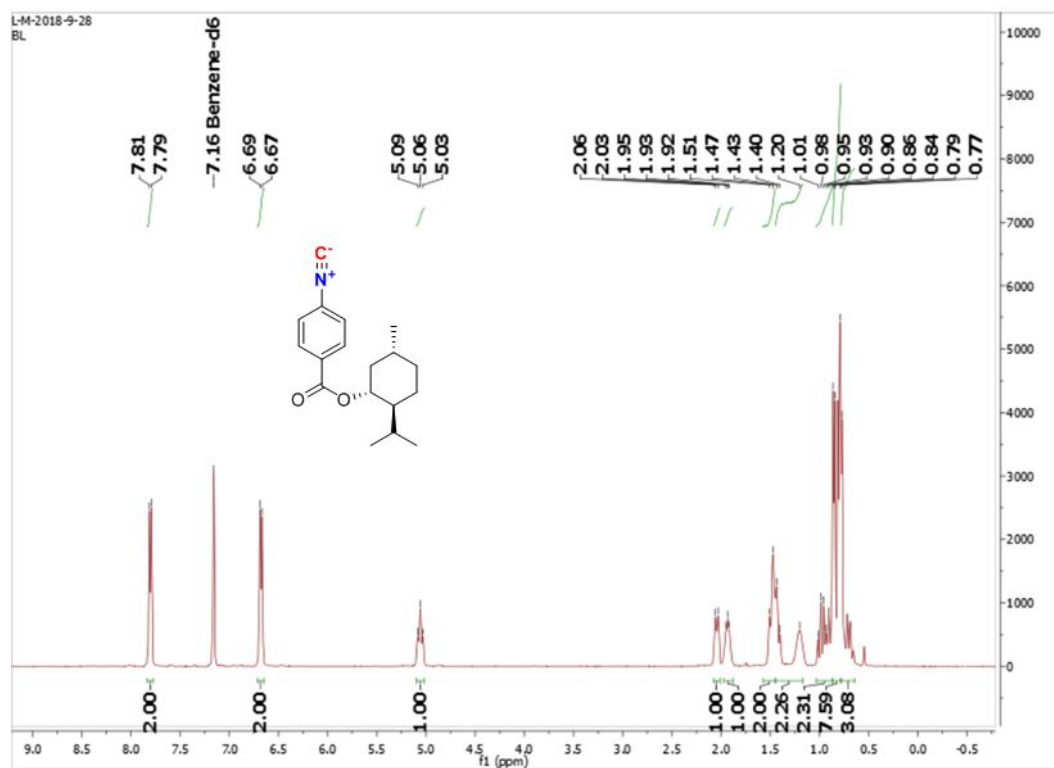

**Figure S9.** <sup>1</sup>H NMR spectrum of (*1R,2S,5R*)-2-isopropyl-5-methylcyclohexyl-4-isocyanobenzoate (**e**).

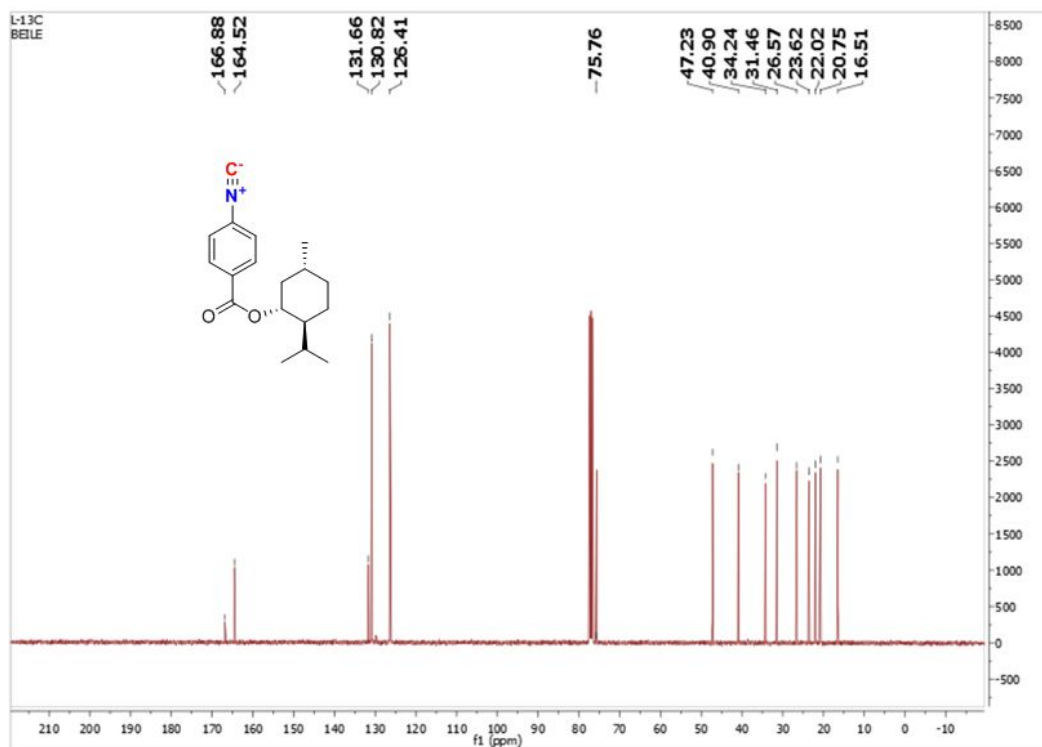

**Figure S10.** <sup>13</sup>C NMR spectrum of (1*R*,2*S*,5*R*)-2-isopropyl-5-methylcyclohexyl-4-isocyanobenzoate (e).

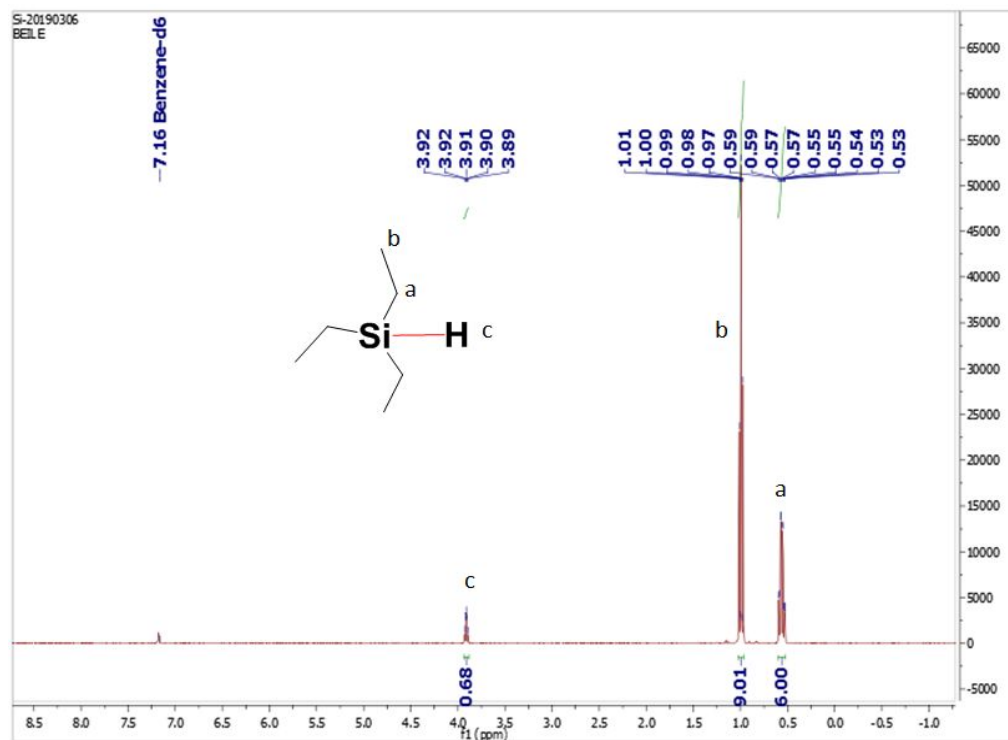

**Figure S11.** <sup>1</sup>H NMR spectra of Et<sub>3</sub>SiH.

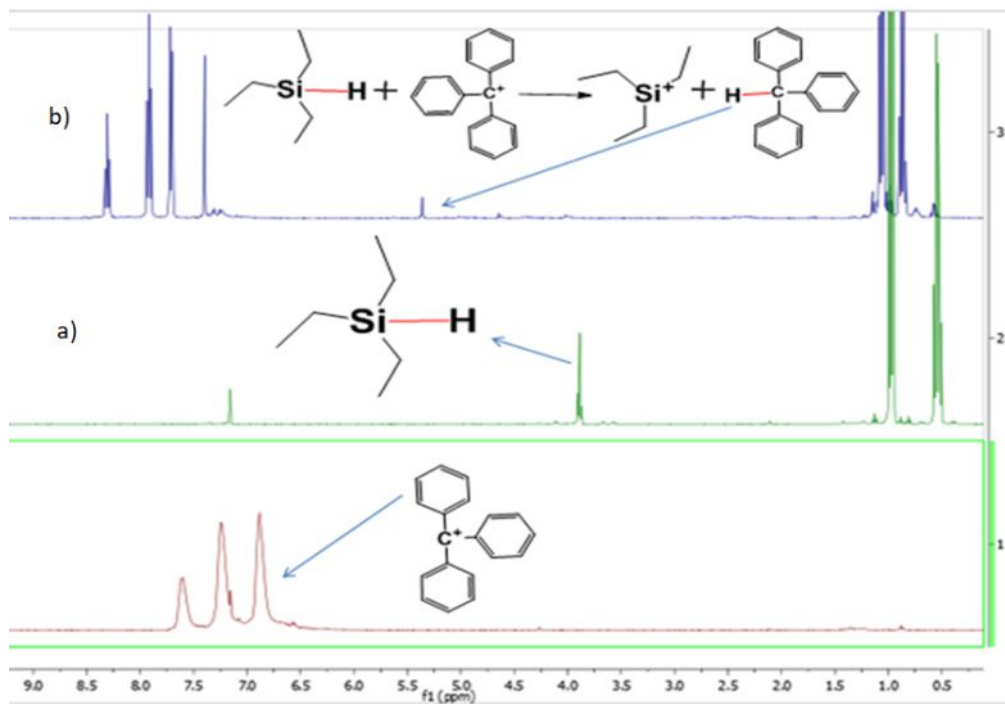

**Figure S12.** (a)  $^1\text{H}$  NMR spectra of  $\text{Et}_3\text{SiH}$  and (b) corresponding cationic species *in situ* generated by reaction of  $\text{Et}_3\text{SiH}$  with catalyst  $[\text{Ph}_3\text{C}][\text{B}(\text{C}_6\text{F}_5)_4]$ .

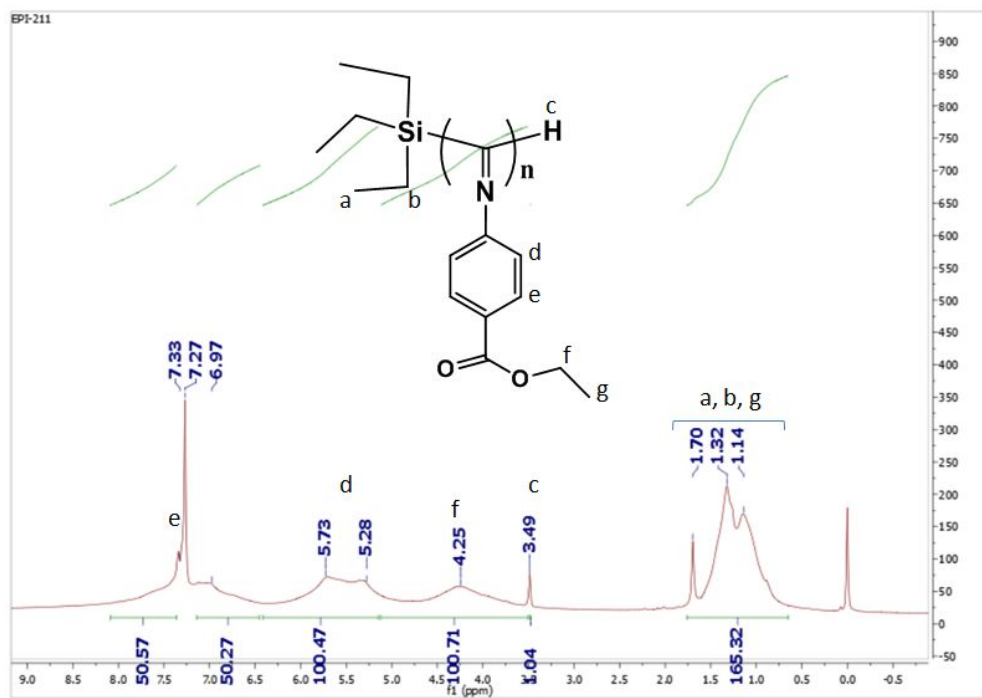

**Figure S13.**  $^1\text{H}$  NMR of poly(EPI) with  $\text{Et}_3\text{SiH}$  as end group (Table 1, entry 4).



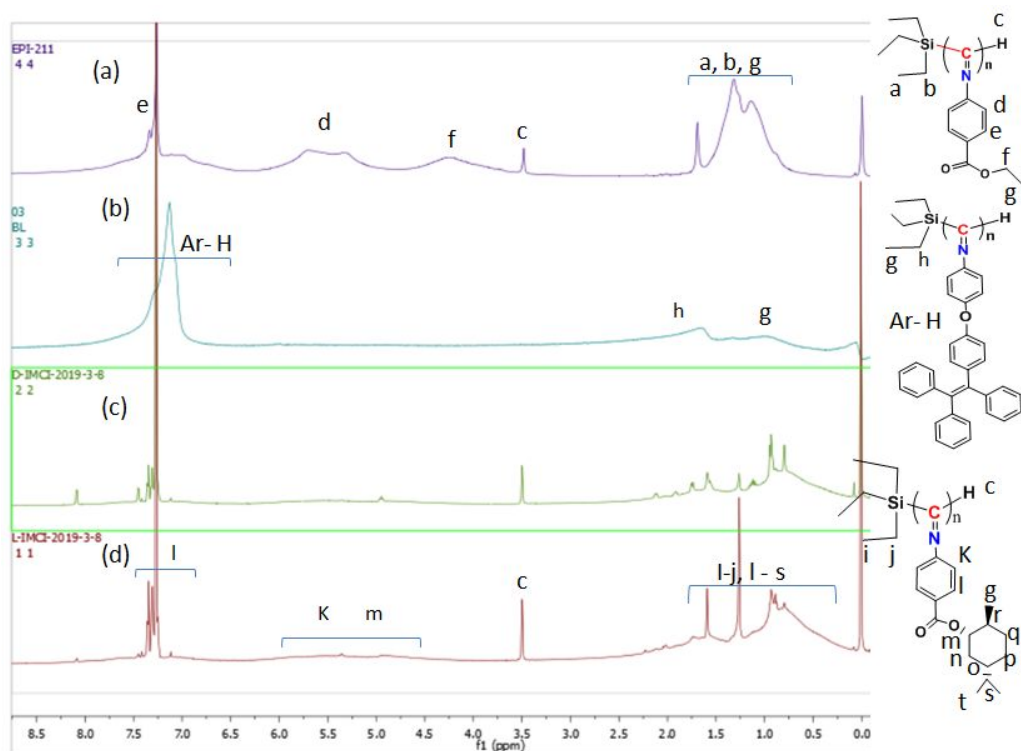

**Figure S14.** (a)  $^1\text{H}$  NMR of poly(EPI) (Table 2, entry 4), (b) Poly(ITPPA) (Table 2, entry 8), (c) Poly(D-IMCI) (Table 2, entry 9) and (d) Poly(L-IMCI) (Table 2, entry 10).

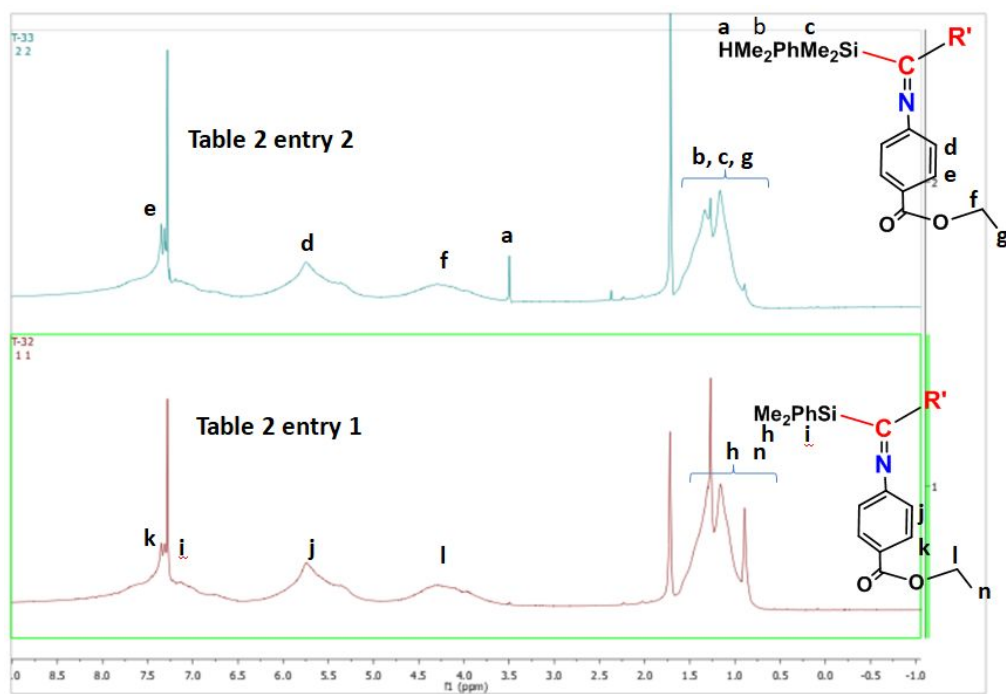

**Figure S15.**  $^1\text{H}$  NMR of poly(EPI) with different silane source as end group (Table 2, entries 1–2).

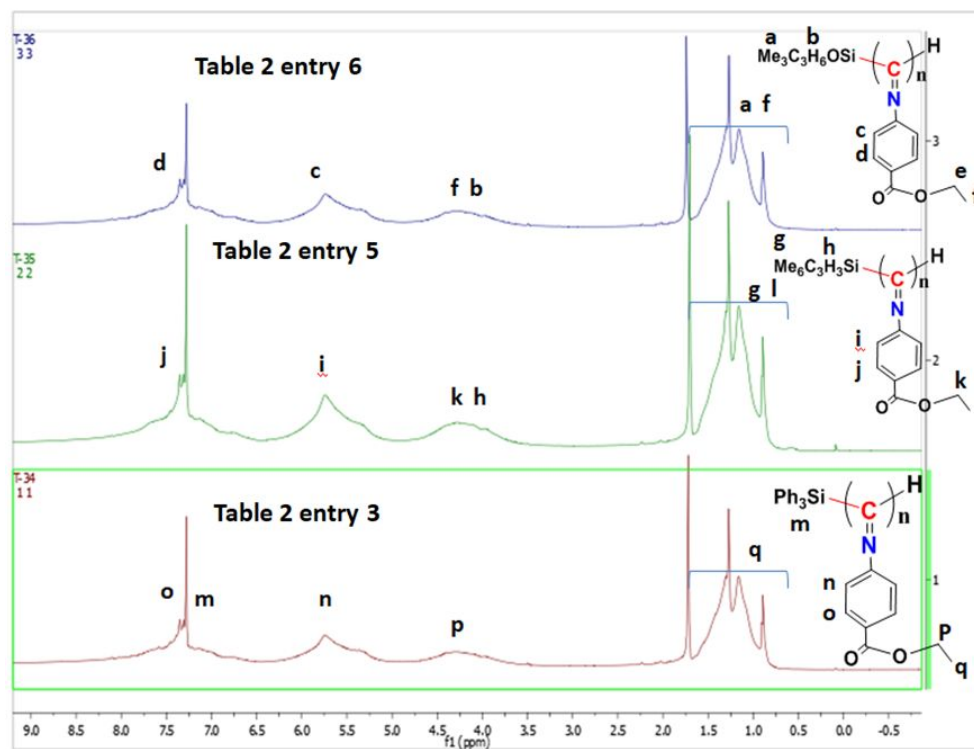

**Figure S16.**  $^1\text{H}$  NMR of poly(EPI) with different silane source as end group (Table 2, entries 3,5–6).

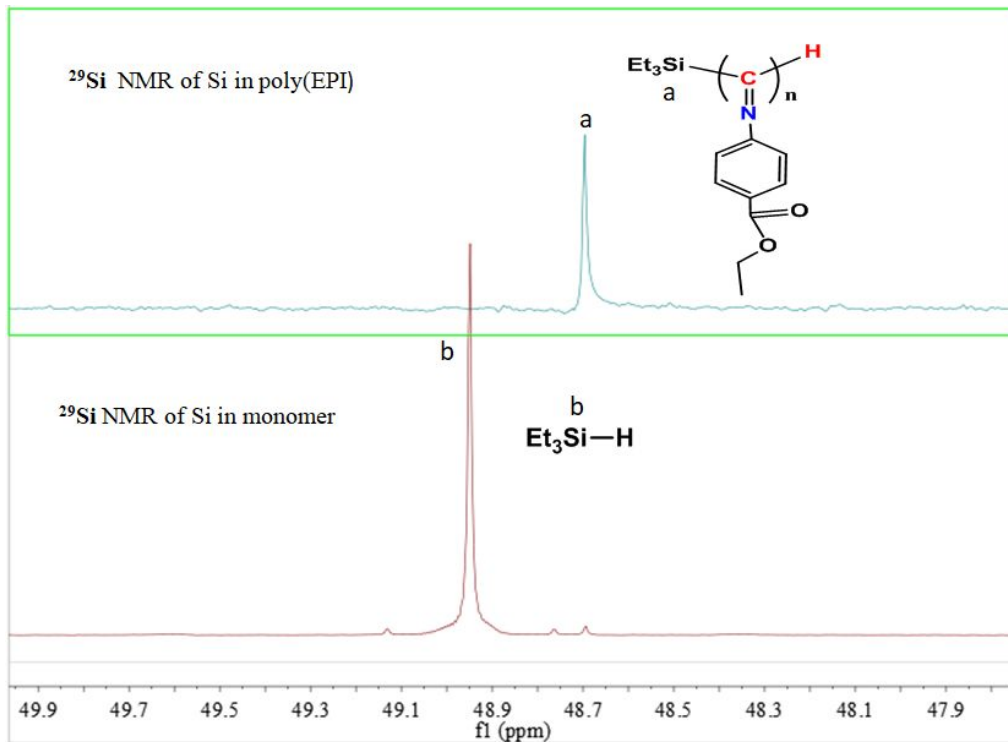

**Figure S17.**  $^{29}\text{Si}$  NMR spectrum of  $\text{Et}_3\text{SiH}$  and  $\text{Et}_3\text{Si}$ -end-functionalized poly(EPI) (Table 2, entry 4).

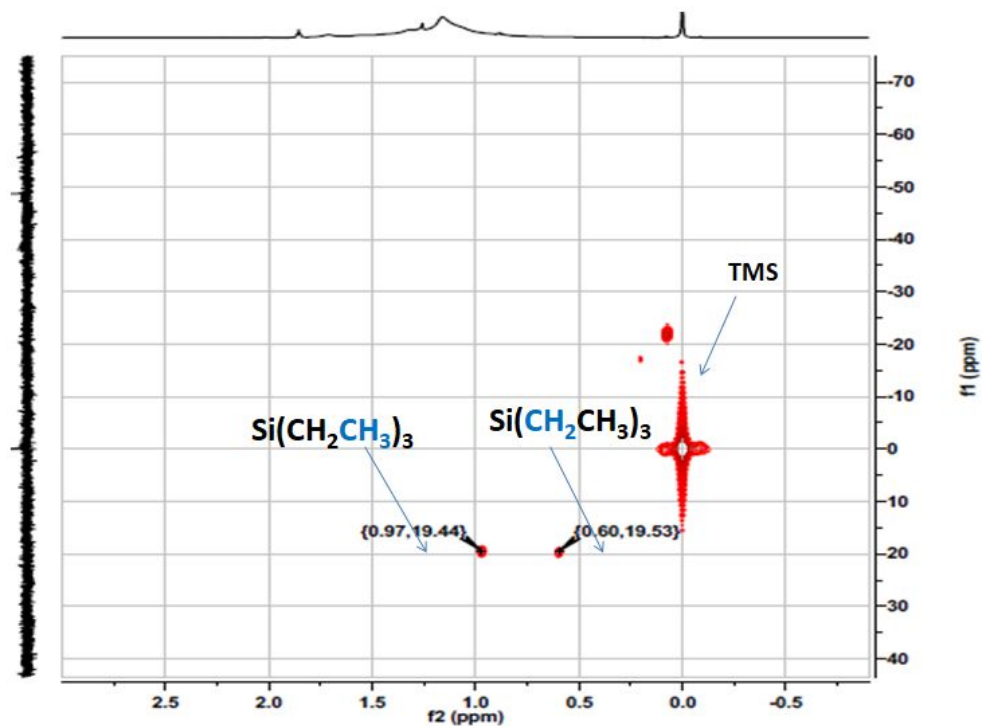

**Figure S18.** ( $^1\text{H} + ^{29}\text{Si}$ ) gHMBC NMR spectrum of  $\text{Et}_3\text{Si}$ -end-functionalized poly(EPI) (Table 2, entry 4).

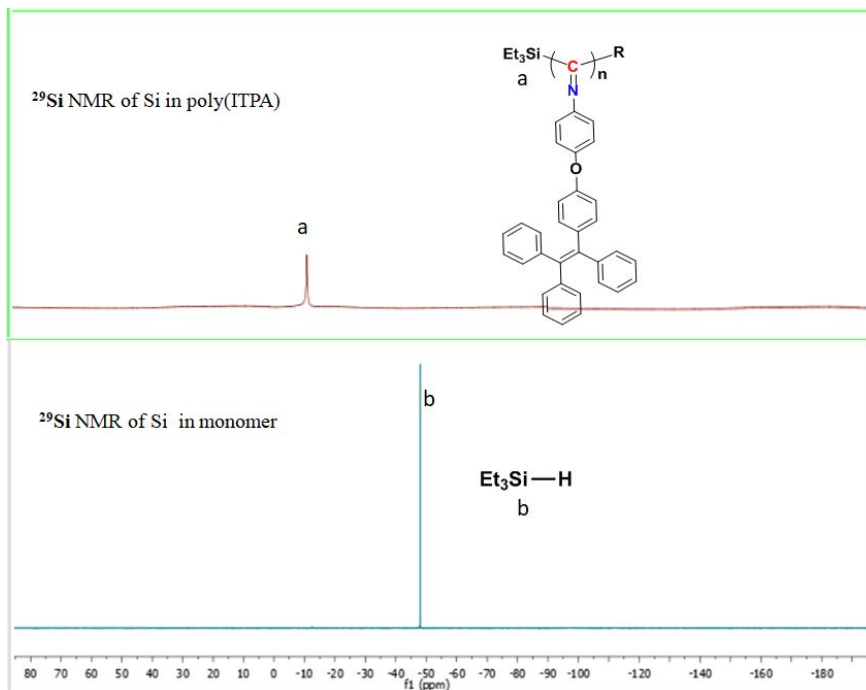

**Figure S19.**  $^{29}\text{Si}$ -NMR spectrum of  $\text{Et}_3\text{SiH}$  and  $\text{Et}_3\text{Si}$ -end-functionalized poly(ITPPA) (Table 2, entry 8).

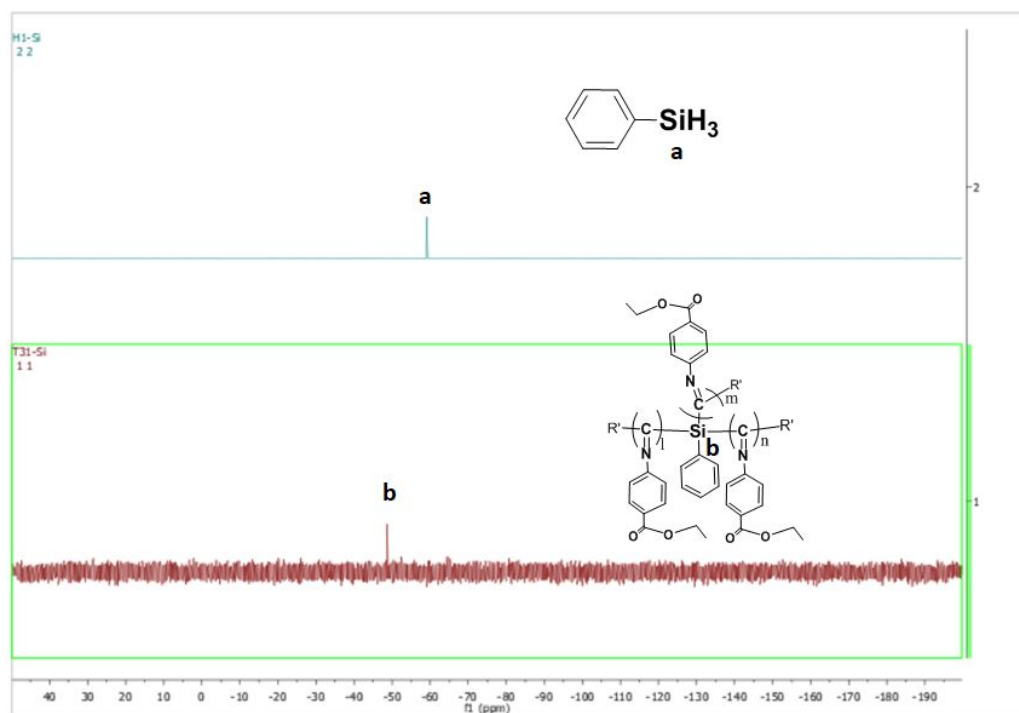

**Figure S20.**  $^{29}\text{Si}$ -NMR spectrum of  $\text{PhSiH}_3$  and **PhSi**-end-functionalized star poly(EPI) (Table 3, entry1).

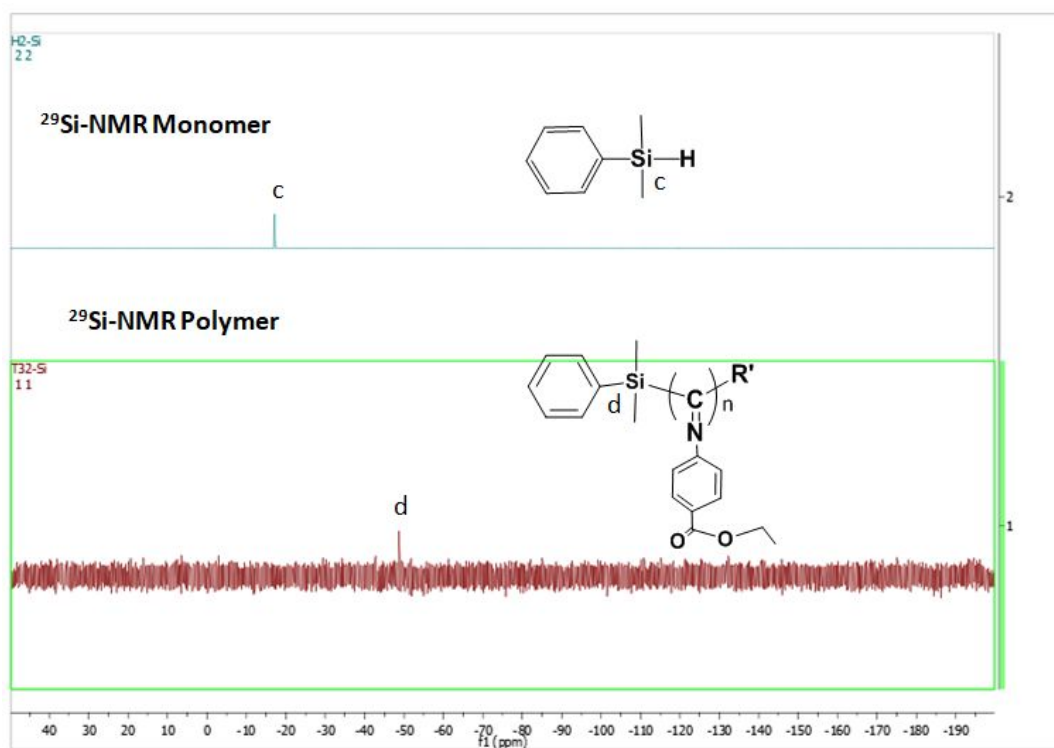

**Figure S21.**  $^{29}\text{Si}$ -NMR spectrum of  $\text{PhMe}_2\text{Si}$ -end-functionalized poly(EPI) (Table 2, entry 1).

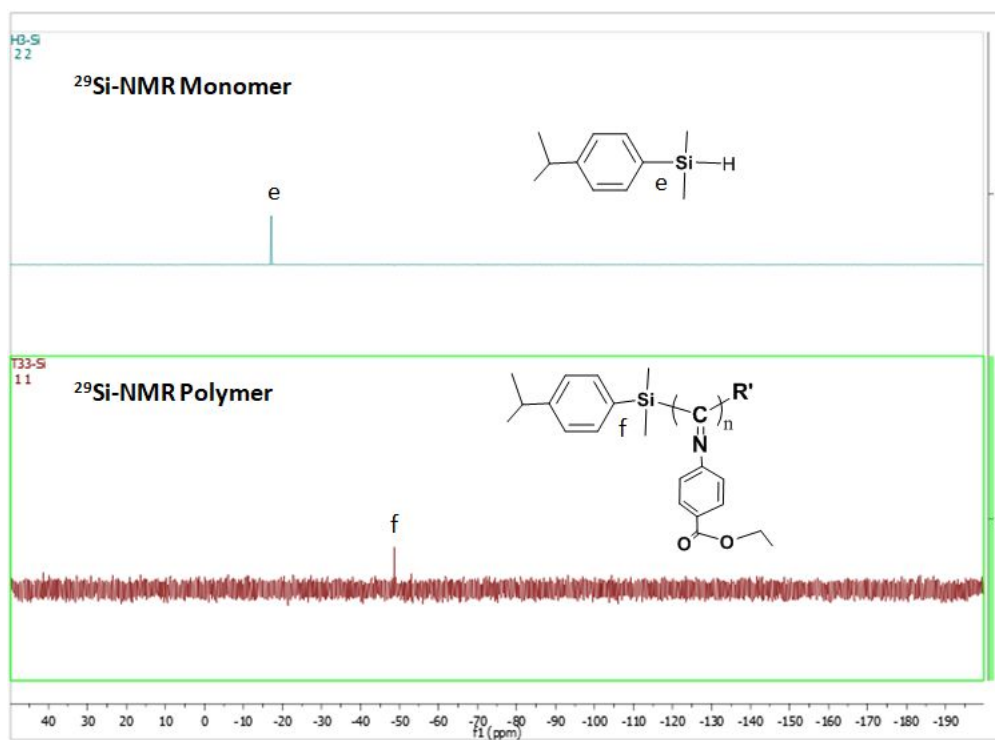

**Figure S22.**  $^{29}\text{Si}$ -NMR spectrum of (4- $i\text{-PrC}_6\text{H}_4$ ) $\text{Me}_2\text{Si}$ -end-functionalized poly(EPI) (Table 2, entry 2).

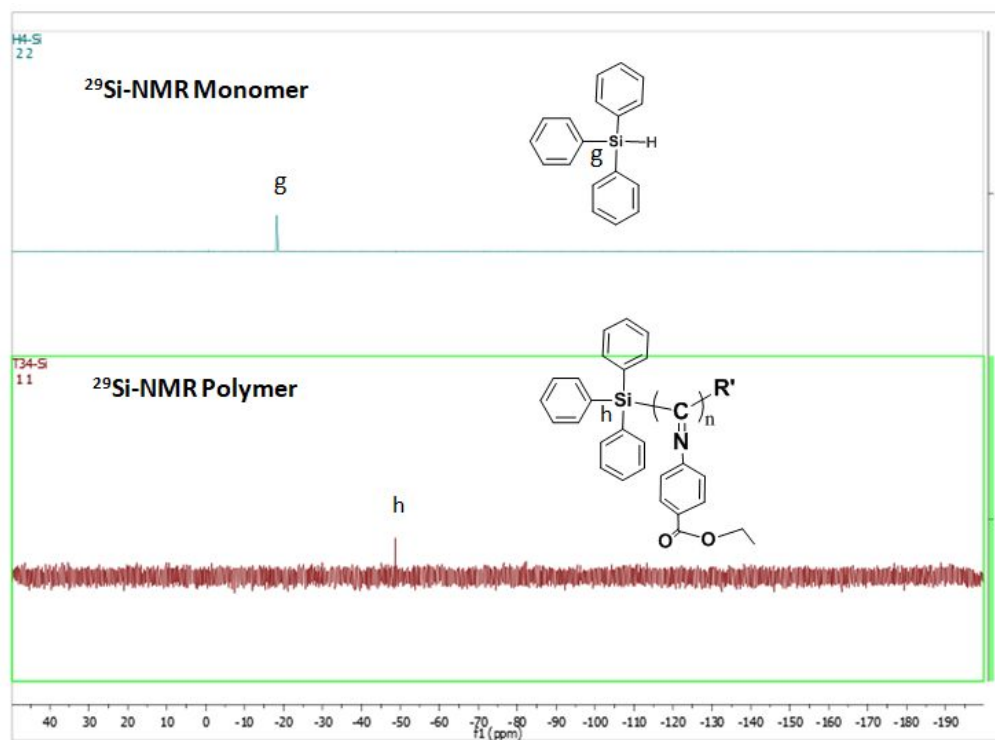

**Figure S23.**  $^{29}\text{Si}$ -NMR spectrum of  $\text{Ph}_3\text{Si}$ -end-functionalized poly(EPI) (Table 2, entry 3).

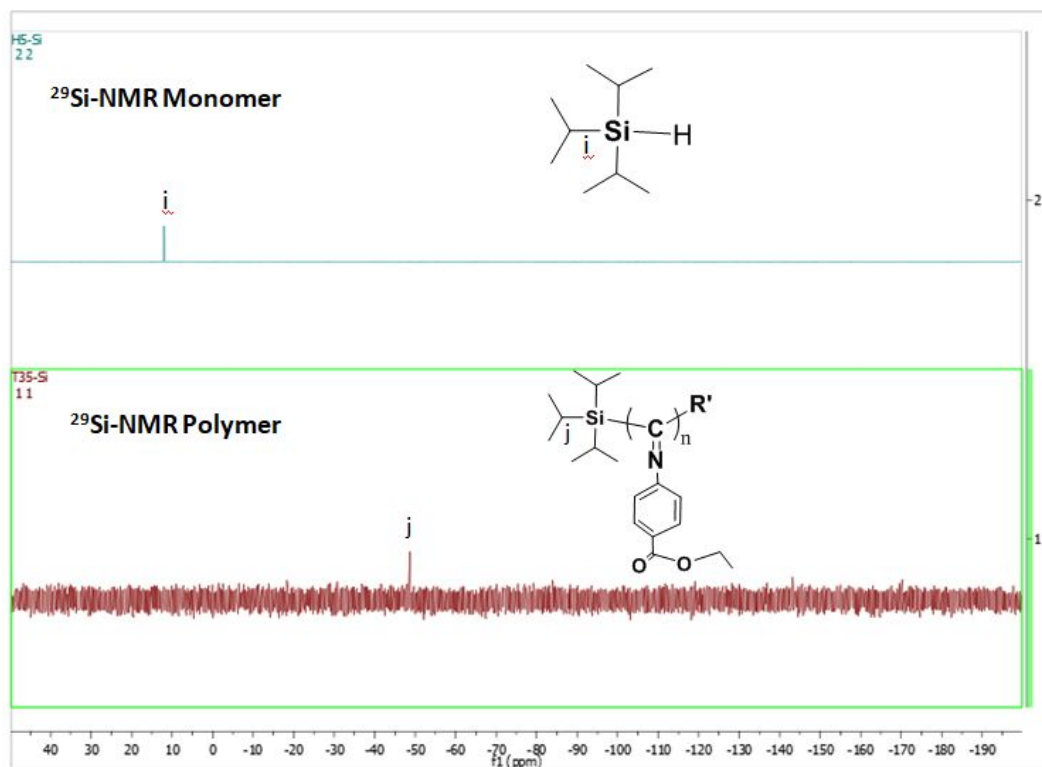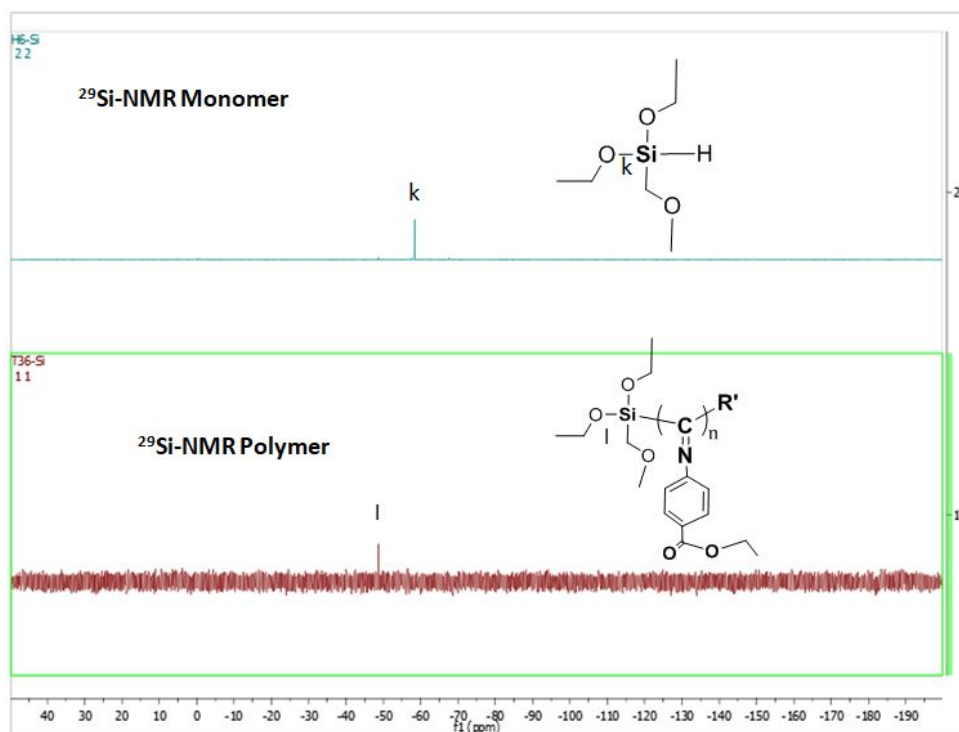

**Figure S25.**  $^{29}\text{Si}$ -NMR spectrum of (OEt) $_3$ Si-end-functionalized poly(EPI) (Table 2, entry 6).

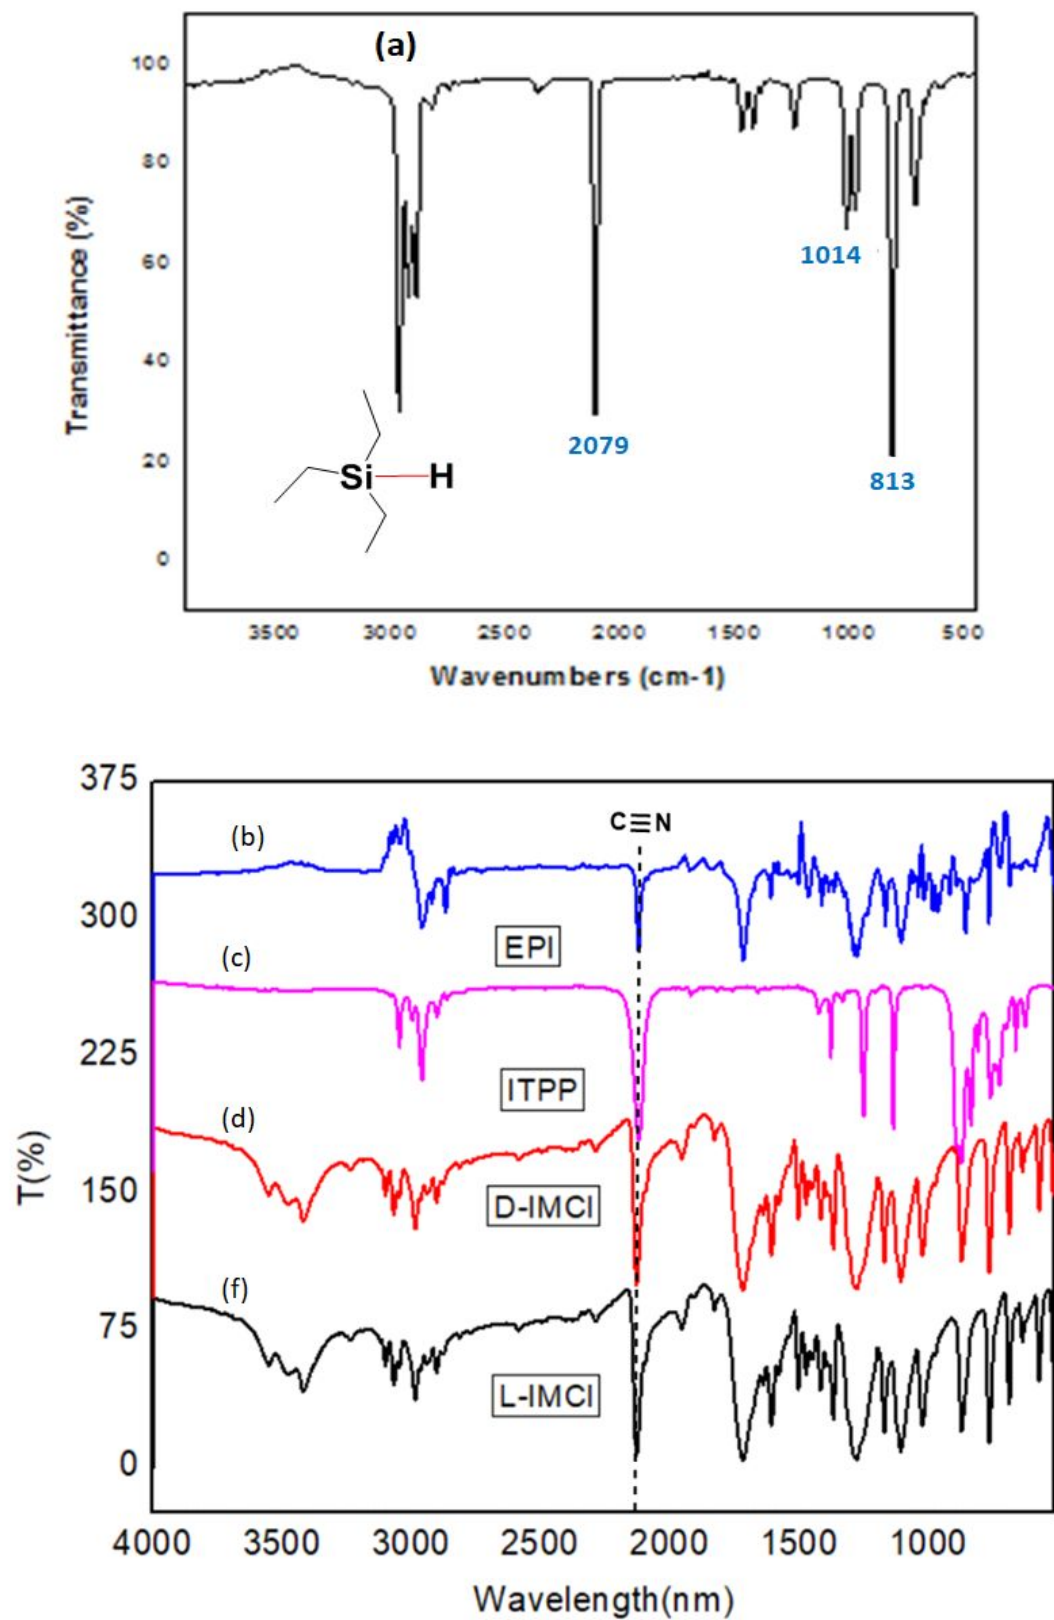

**Figure S26.** FT-IR spectra of **monomers** (a)  $\text{Et}_3\text{SiH}$ , (b) EPI, (c) ITPPA, (d) D-IMCI and (e) L-IMCI.



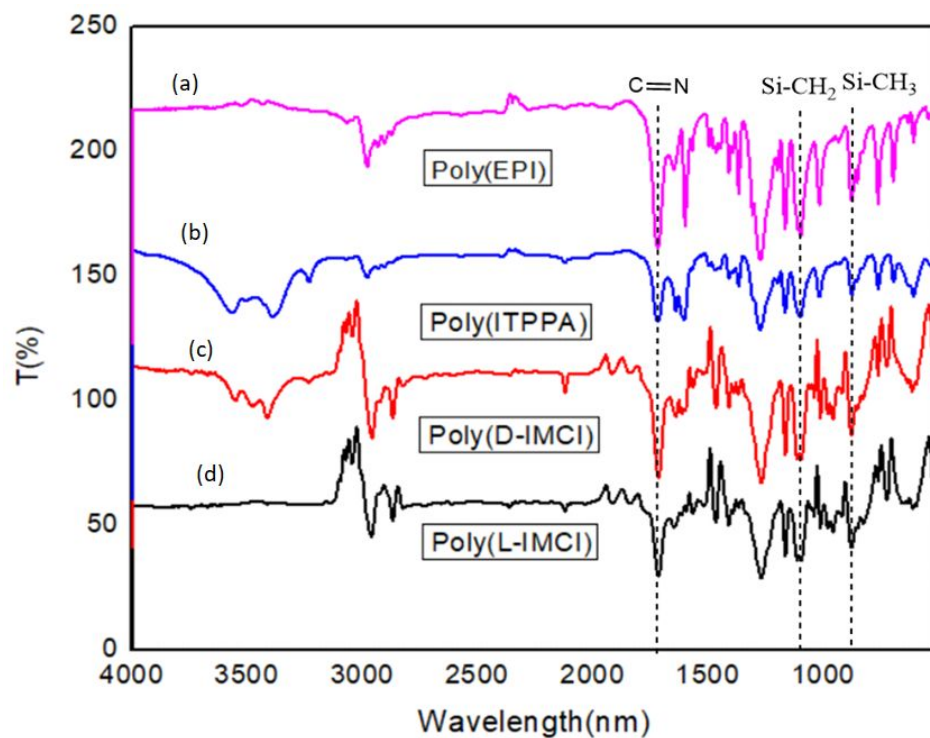

**Figure S27.** FT-IR spectra of (a) Poly(EPI) (Table 2, entry 4), (b) Poly(ITPPA) (Table 2, entry 8), (c) Poly(D-IMCI) (Table 2, entry 9), (d) Poly(L-IMCI) (Table 2, entry 10).

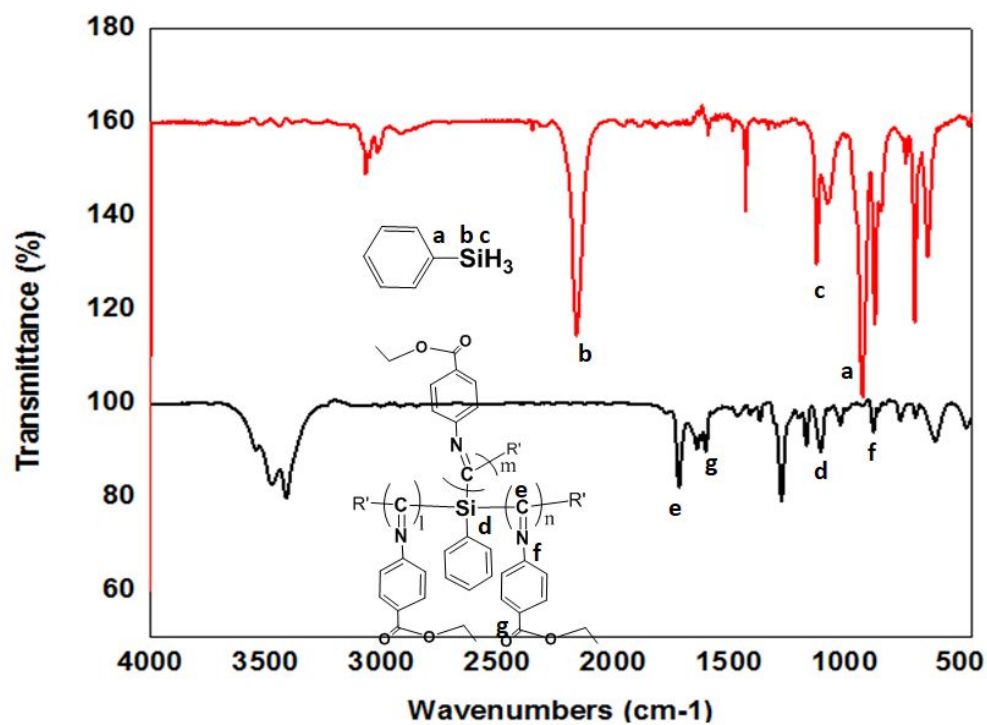

**Figure S28.** FT-IR spectra of PhSiH<sub>3</sub> and PhSi-end-functionalized star poly(EPI) (Table 3, entry 1).



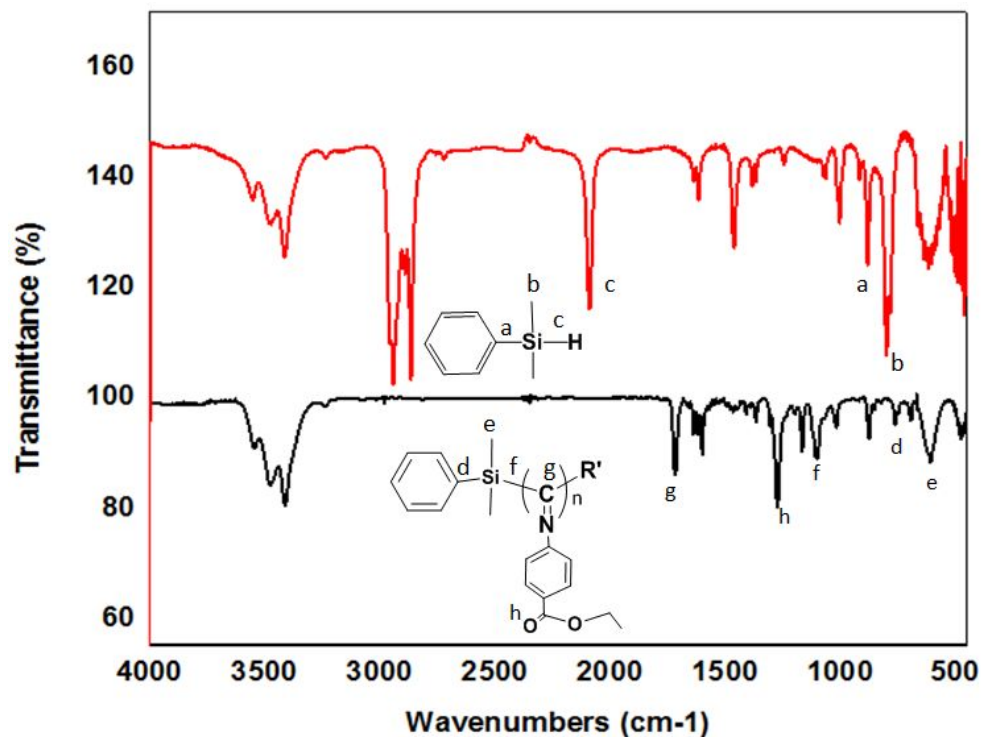

**Figure S29.** FT-IR spectra of PhMe<sub>2</sub>SiH and PhMe<sub>2</sub>Si-end-functionalized poly(EPI) (Table 2, entry 1).

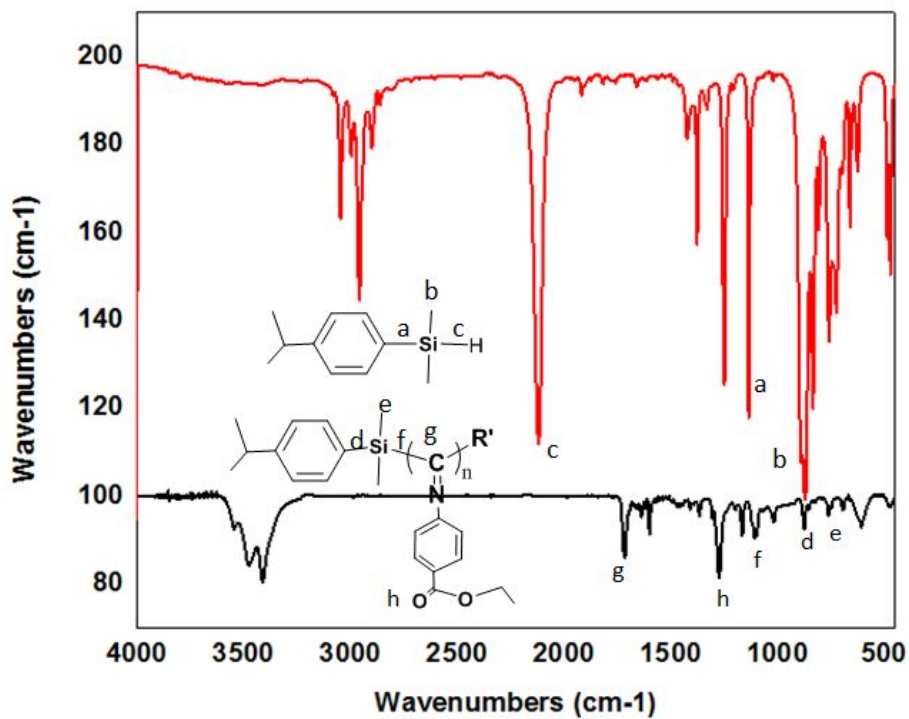

**Figure S30.** FT-IR spectra of (4-<sup>i</sup>PrC<sub>6</sub>H<sub>4</sub>)Me<sub>2</sub>SiH and (4-<sup>i</sup>PrC<sub>6</sub>H<sub>4</sub>)Me<sub>2</sub>Si-end-functionalized poly(EPI) (Table 2, entry 2).

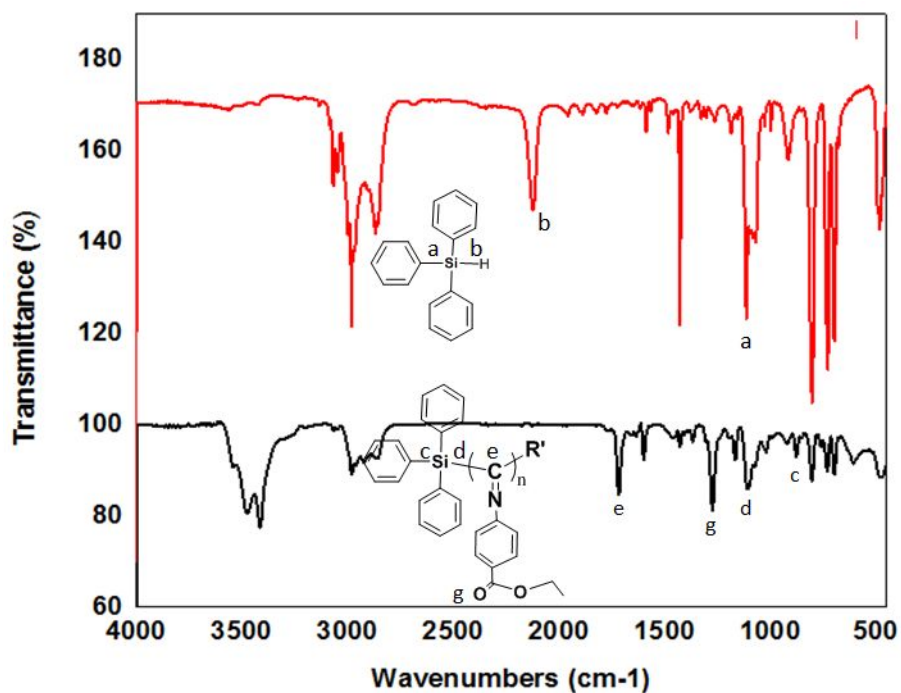

**Figure S31.** FT-IR spectra of  $\text{Ph}_3\text{SiH}$  and  $\text{Ph}_3\text{Si}$ -end-functionalized poly(EPI) (Table 2, entry 3).

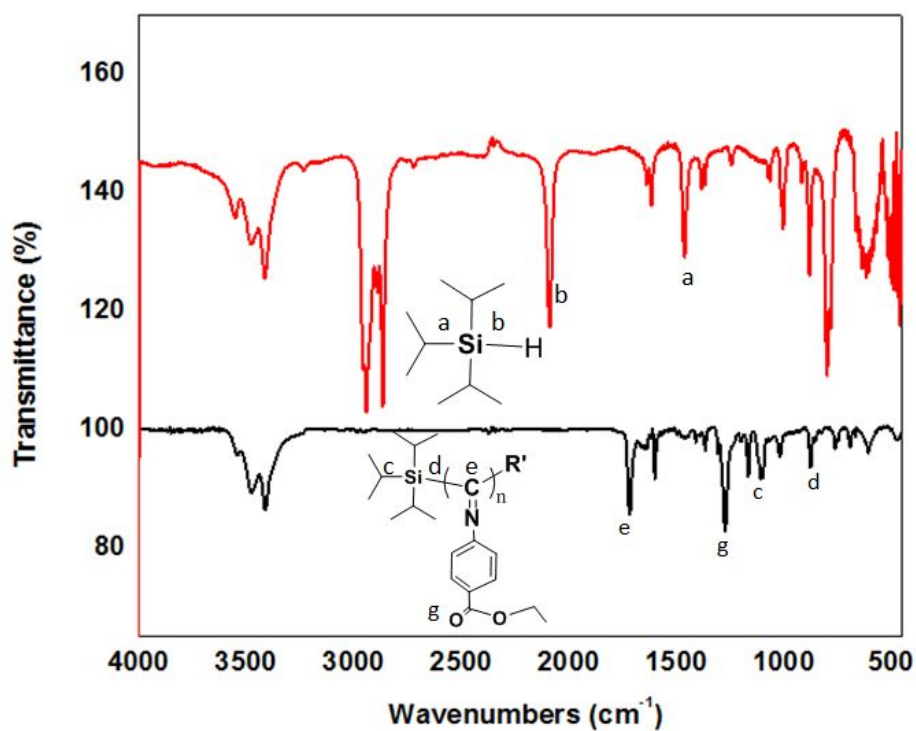

**Figure S32.** FT-IR spectra of  $i\text{Pr}_3\text{SiH}$  and  $i\text{Pr}_3\text{Si}$ -end-functionalized poly(EPI) (Table 2, entry 5).

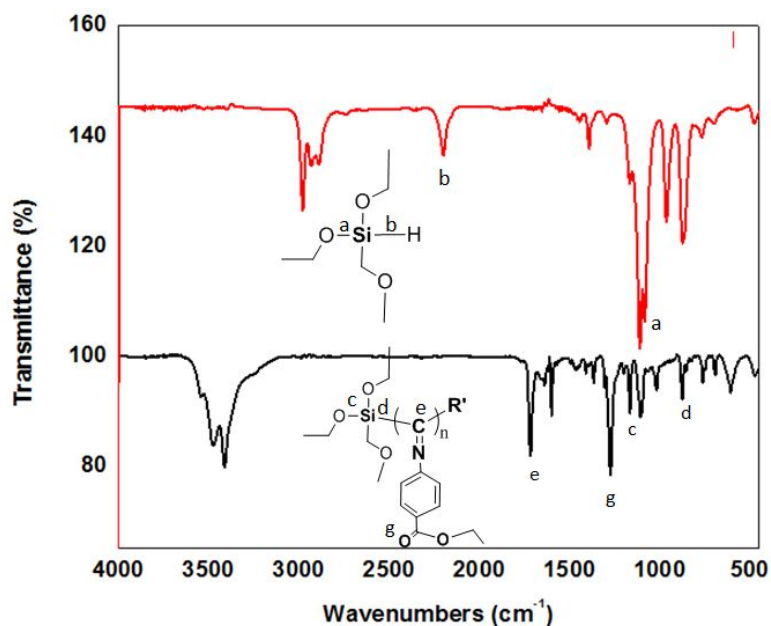

**Figure S33.** FT-IR spectra of  $(\text{OEt})_3\text{SiH}$  and  $(\text{OEt})_3\text{Si}$ -end-functionalized poly(EPI) (Table 2, entry 6).

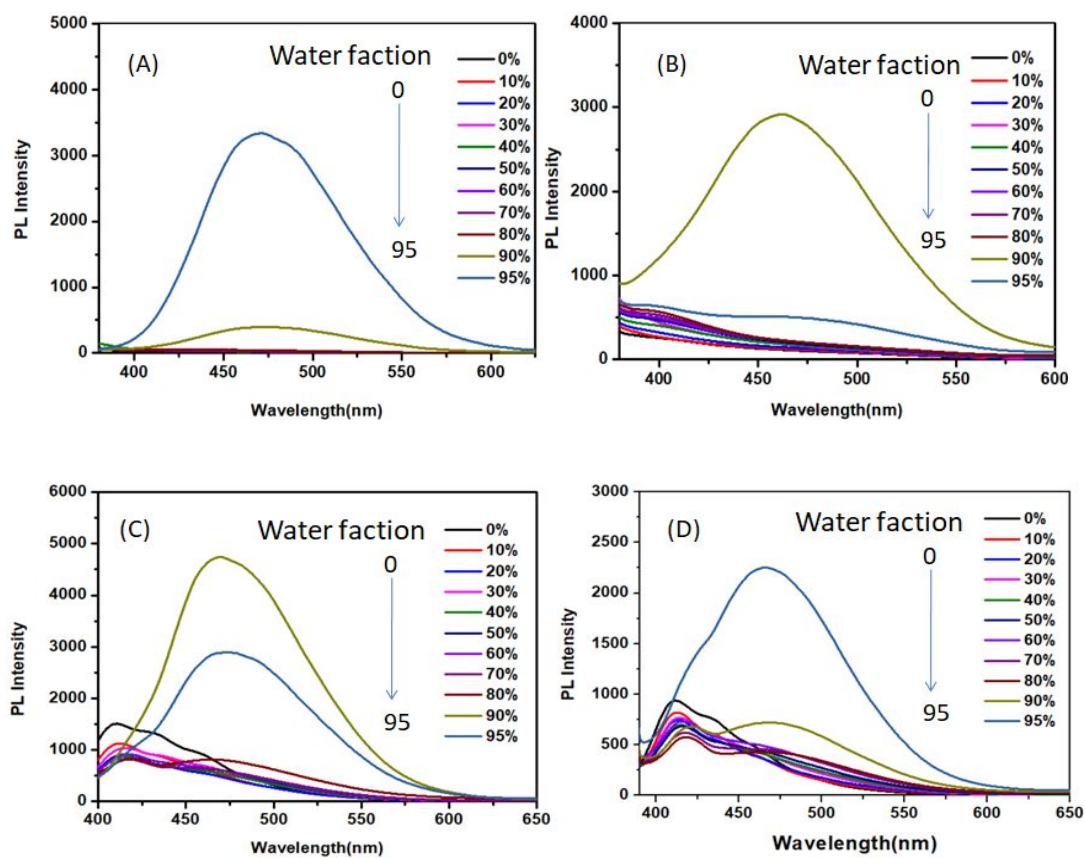

**Figure S34.** Plots of fluorescence intensity vs water fraction in THF/water mixture (0.01 mg/mL) (A) ITPP,

(B) Poly(ITPP) (Table 2, entry 7), (C) ITPPA, (D) Poly(ITPPA) (Table 3, entry 8) (conditions: EX wavelength: 290 nm, EX slit: 5 nm, EM slit: 5 nm, 700 V).

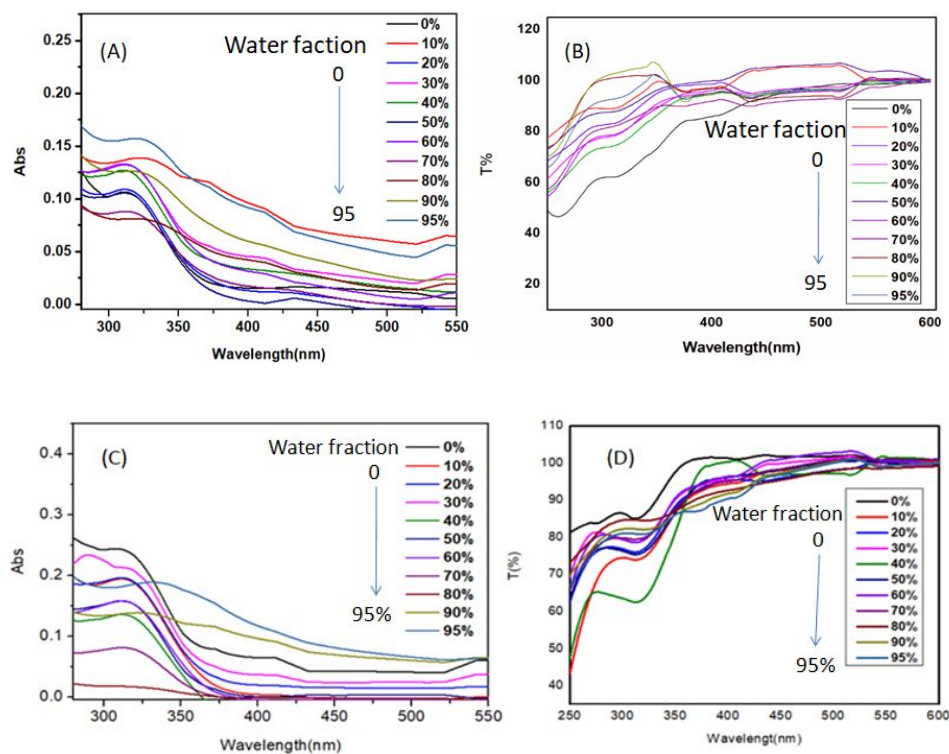

**Figure S35.** UV absorption and transmittance spectra of (A) ITPP, (B) Poly(ITPP) (Table 2, entry 7), (C) ITPPA and (D) Poly(ITPPA) (Table 2, entry 8) with the water fraction in THF/water mixture ranging from 0 to 95%.

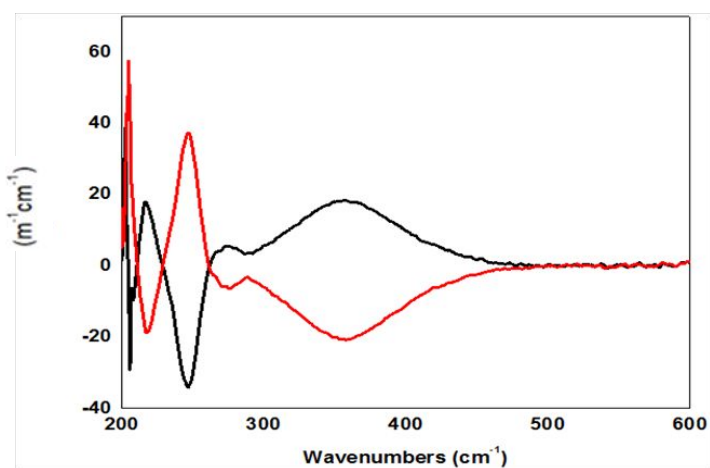

**Figure S36.** CD Spectra of Et<sub>3</sub>Si-end-functionalized poly(D-IMCI) and Et<sub>3</sub>Si-end-functionalized poly(L-IMCI) (Table 2, entries 9–10).

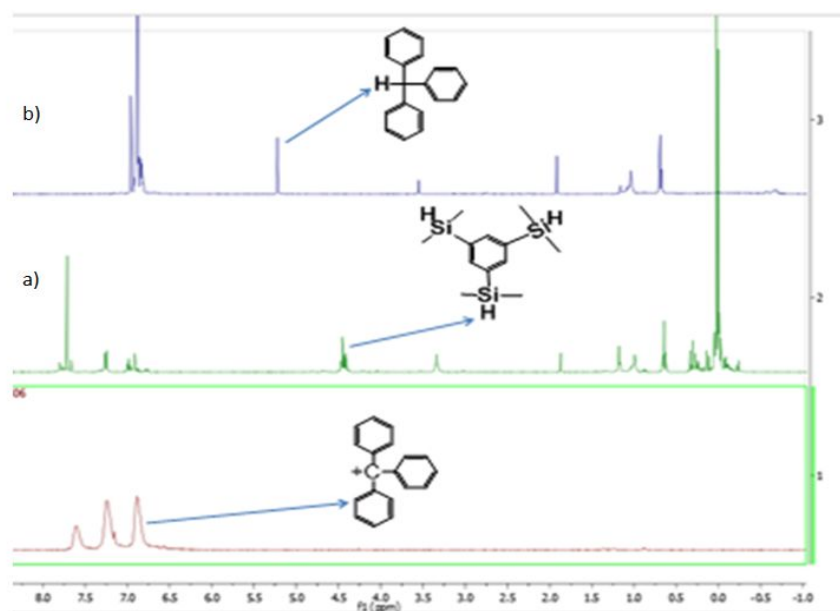

**Figure S37.** (a)  $^1\text{H}$  NMR spectra of 1,3,5-(SiMe<sub>2</sub>H)<sub>3</sub>-C<sub>6</sub>H<sub>3</sub> and (b) corresponding cationic species *in situ* generated by reaction of Poly-Si-H with catalyst [Ph<sub>3</sub>C][B(C<sub>6</sub>F<sub>5</sub>)<sub>4</sub>].

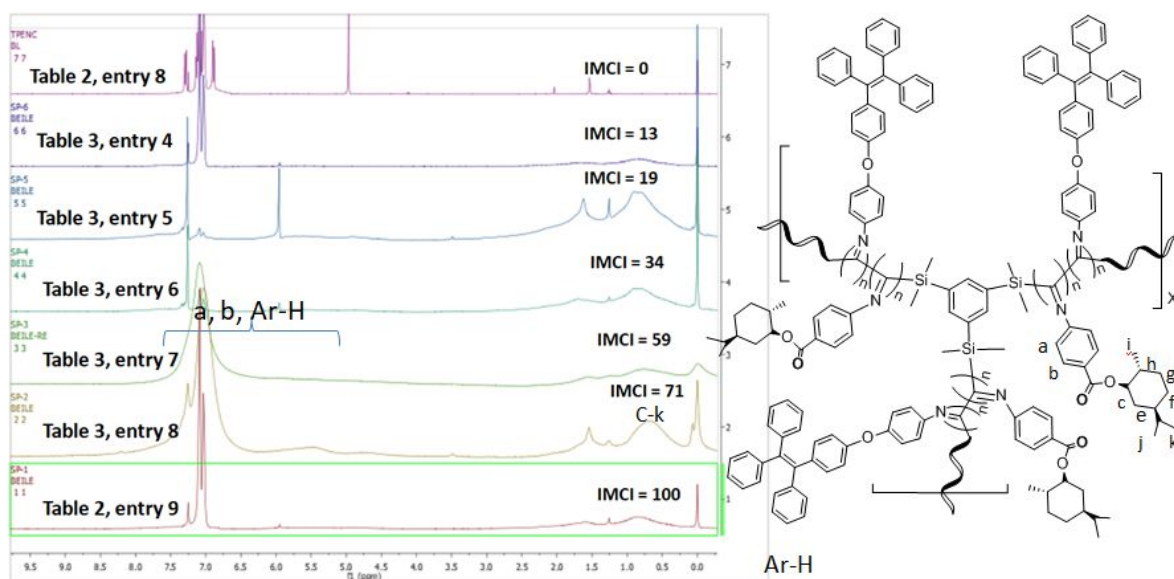

**Figure S38.**  $^1\text{H}$  NMR spectra of Poly(ITPPA) (Table 2, entry 8), Poly(D-IMCI-co-ITPPA)s (Table 3, entries 4–8) and Poly(D-IMCI) (Table 3, entry 9).

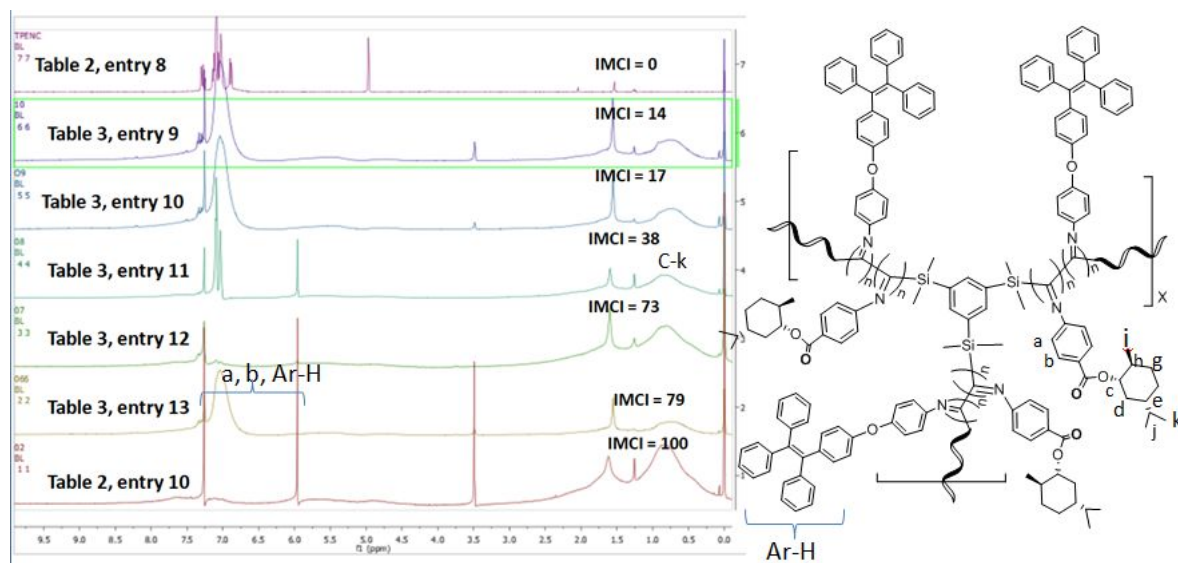

**Figure S39.**  $^1\text{H}$  NMR spectra of Poly(ITPPA) (Table 2, entry 8), Poly(L-IMCI-co-ITPPA)s (Table 4, entries 9–13) and Poly(L-IMCI) (Table 3, entry 10).

$^{29}\text{Si}$ -NMR in star homopolymer

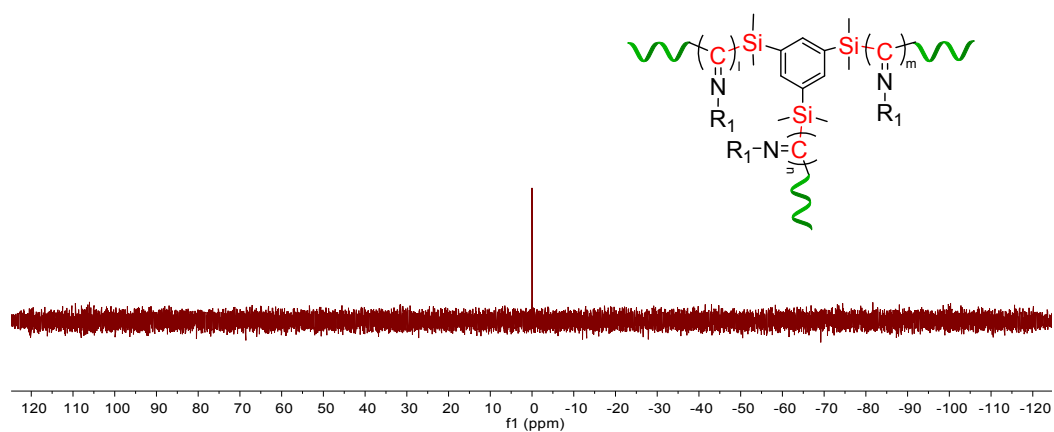

**Figure S40.**  $^{29}\text{Si}$ -NMR spectrum of poly(D-IMCI) (Table 3, entry 2).



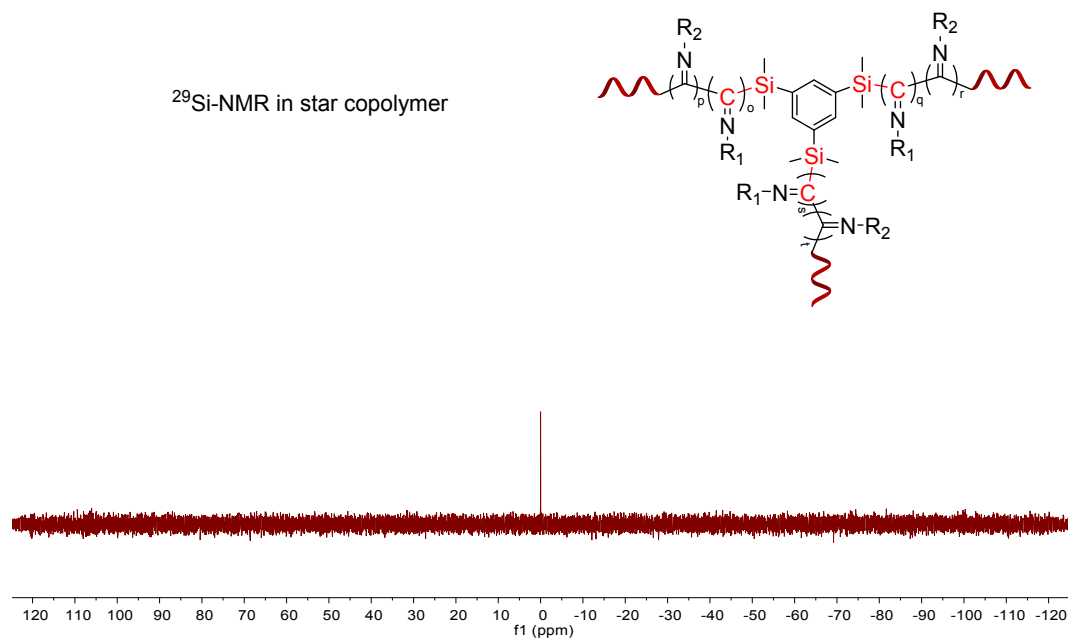

**Figure S41.**  $^{29}\text{Si}$ -NMR spectrum of poly(D-IMCI-*co*-ITPPA) (Table 3, entry 6).

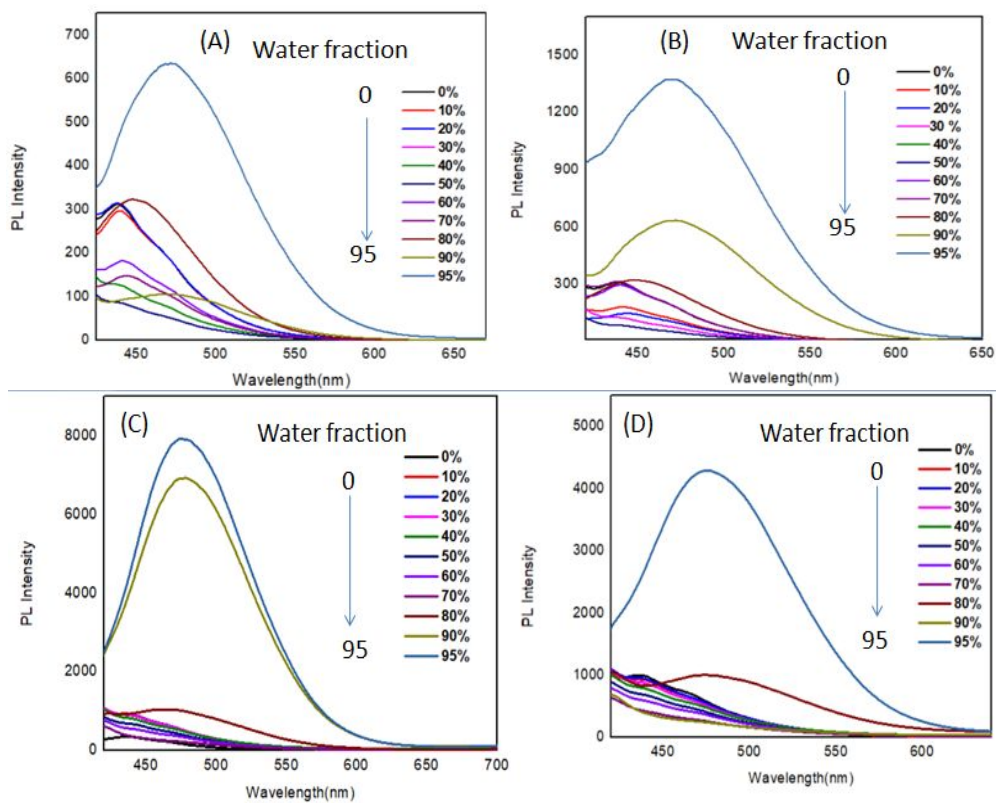

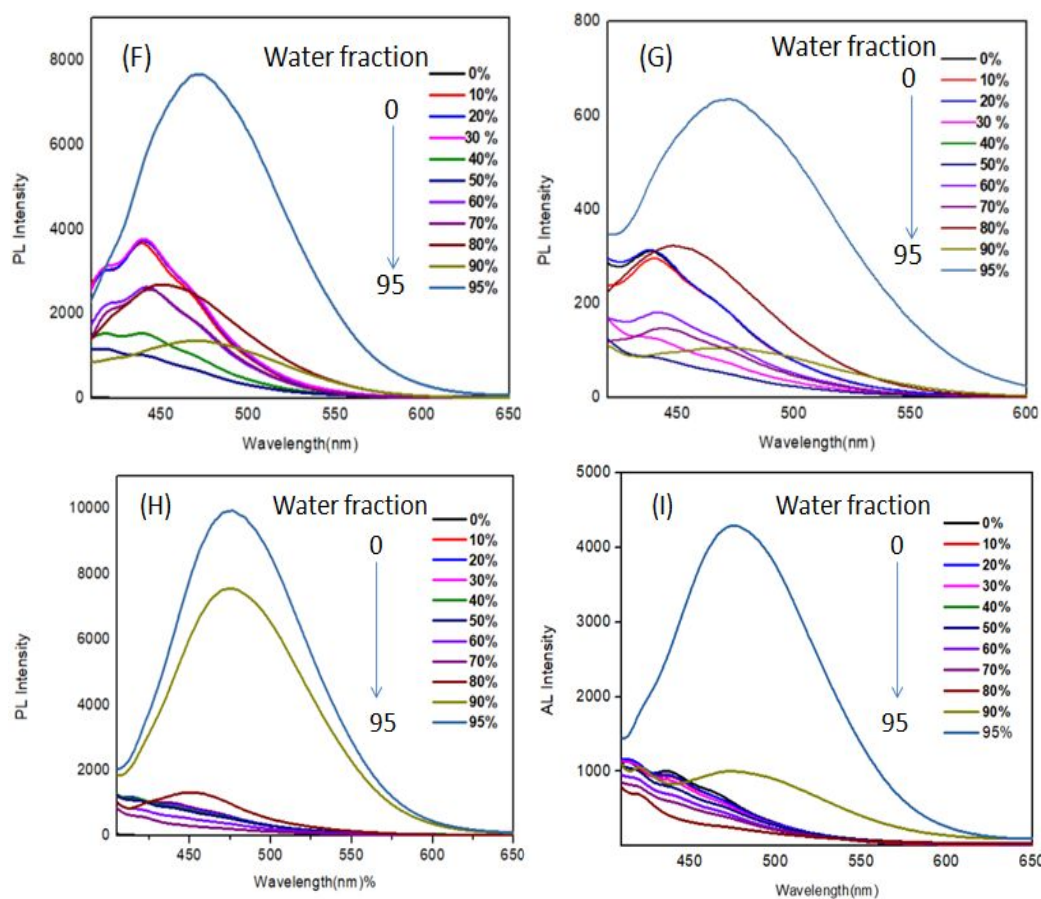

**Figure S42.** Plots of fluorescence intensity vs water fraction in THF/water mixture (0.01 mg/mL) (A) Poly(D-IMCI-co-ITPPA) (Table 3, entry 4), (B) Poly(D-IMCI-co-ITPPA) (Table 3, entry 5), (C) Poly(D-IMCI-co-ITPPA) (Table 3, entry 6), (D) Poly(D-IMCI-co-ITPPA) (Table 3, entry 8), (F) Poly(L-IMCI-co-ITPPA) (Table 3, entry 9), (G) Poly(L-IMCI-co-ITPPA) (Table 3, entry 10), (H) Poly(L-IMCI-co-ITPPA) (Table 3, entry 11) and (I) Poly(L-IMCI-co-ITPPA) (Table 3, entry 13) (conditions: EX wavelength: 290 nm, EX slit: 5 nm, EM slit: 5 nm, 700 V).

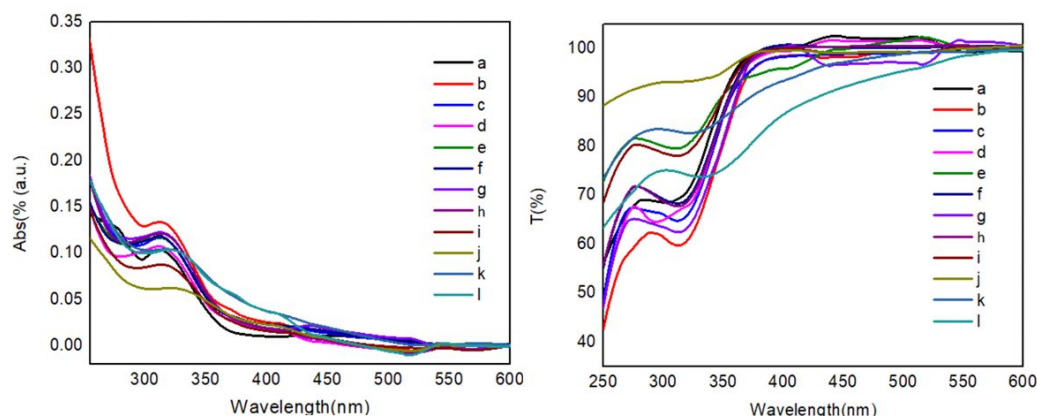



**Figure S43.** UV absorption and transmittance spectra of (a) baseline, (b) ITPPA, (c) Poly(ITPPA) (Table 2, entry 8), (d-g) (Poly(D-IMCI-co-ITPPA)s (Table 3, entries 4–8) and (h-l) Poly(L-IMCI-co-ITPPA)s (Table 3, entries 9–13) in THF.

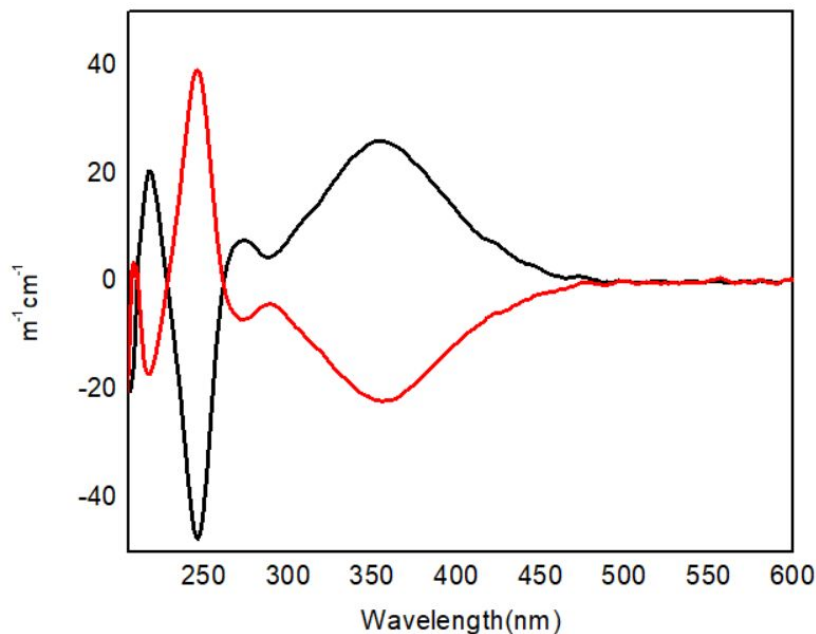

**Figure S44.** CD spectra of poly(D-IMCI) (Table 3, entry 2) and poly(L-IMCI) (Table 3, entry 3).

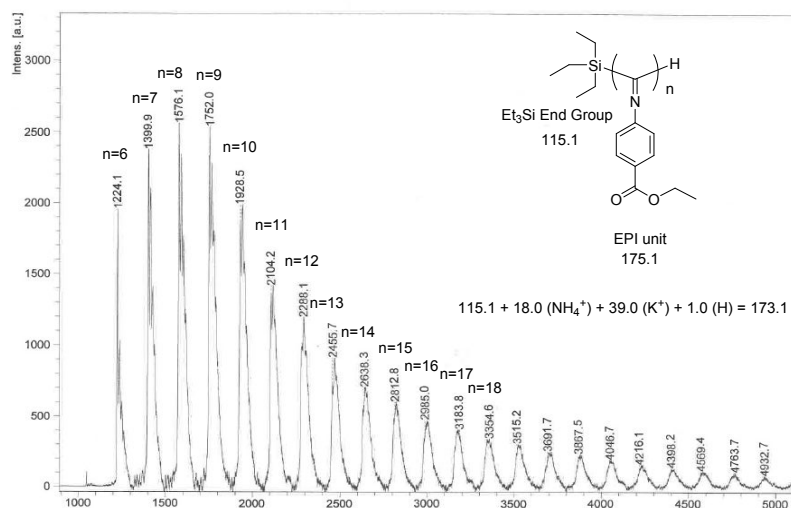

**Figure S45.** MALDI-TOF mass spectrum of EPI oligomer obtained by the binary  $[\text{Ph}_3\text{C}][\text{B}(\text{C}_6\text{F}_5)_4]/\text{Et}_3\text{SiH}$  system.

GPC Curve Synthesis of Silane-End-Functionalized Linear Poly(aryl isocyanide)s through Cationic Polymerization of Aryl Isocyanides Promoted by Cationic Initiator Borates or Borane in the Presence of Hydrosilane.

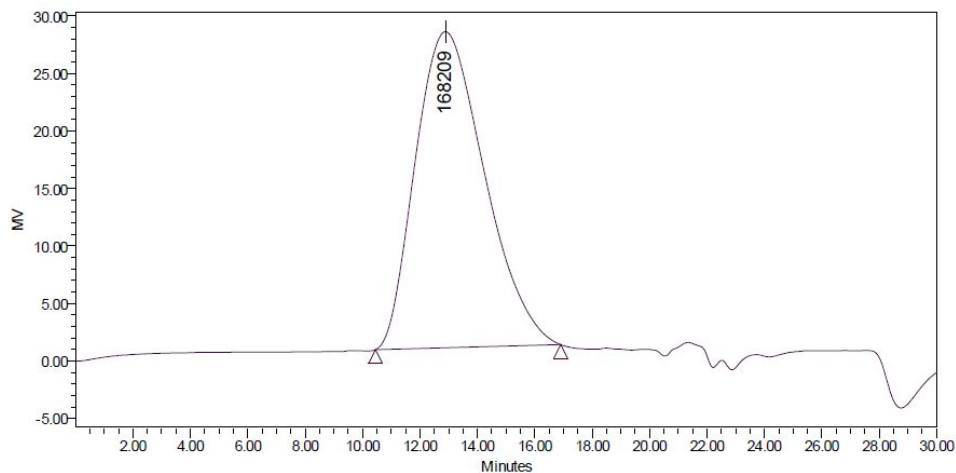

**Broad Unknown Modified Universal Peak Table**

|   | Distribution Name | Mv (Daltons) | K (dl/g) | alpha | Intrinsic Viscosity (dl/g) | Mn (Daltons) | Mw (Daltons) | MP (Daltons) | Mz (Daltons) | Mz+1 (Daltons) | Polydispersity | Mz/Mw    |
|---|-------------------|--------------|----------|-------|----------------------------|--------------|--------------|--------------|--------------|----------------|----------------|----------|
| 1 |                   |              |          |       |                            | 59102        | 229311       | 168209       | 549354       | 912038         | 3.879944       | 2.395673 |

**Figure S46.** GPC curve of Poly(EPI) by cationic catalyst  $[\text{Ph}_3\text{C}][\text{B}(\text{C}_6\text{F}_5)_4]$  in Table 1, entry 1.

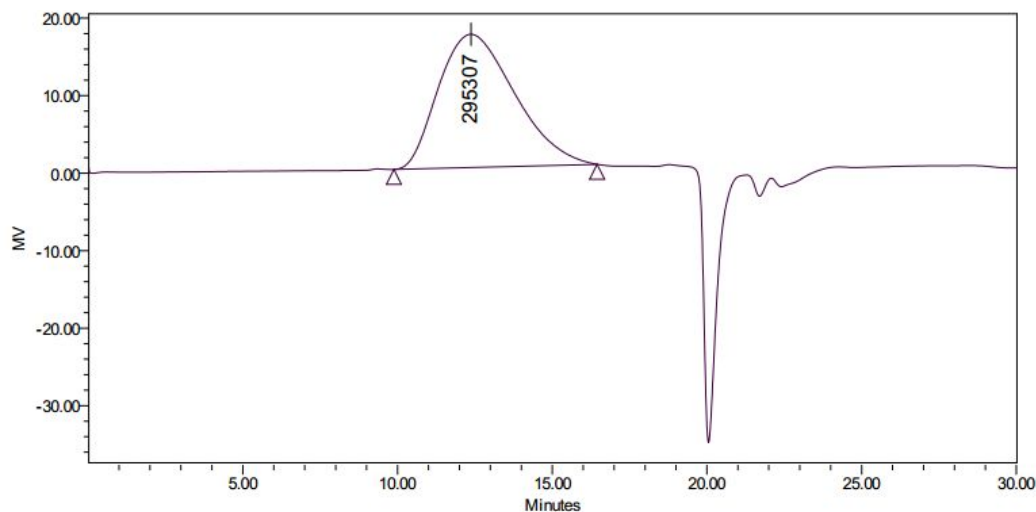

**Broad Unknown Modified Universal Peak Table**

|   | Distribution Name | Mv (Daltons) | K (dl/g) | alpha | Intrinsic Viscosity (dl/g) | Mn (Daltons) | Mw (Daltons) | MP (Daltons) | Mz (Daltons) | Mz+1 (Daltons) | Polydispersity | Mz/Mw    |
|---|-------------------|--------------|----------|-------|----------------------------|--------------|--------------|--------------|--------------|----------------|----------------|----------|
| 1 |                   |              |          |       |                            | 95602        | 405689       | 295307       | 1011338      | 1701846        | 4.243529       | 2.492891 |

**Figure S47.** GPC curve of Poly(EPI) by cationic catalyst  $[(\text{Et}_3\text{Si})_2\text{H}][\text{B}(\text{C}_6\text{F}_5)_4]$  in Table 1, entry 2.

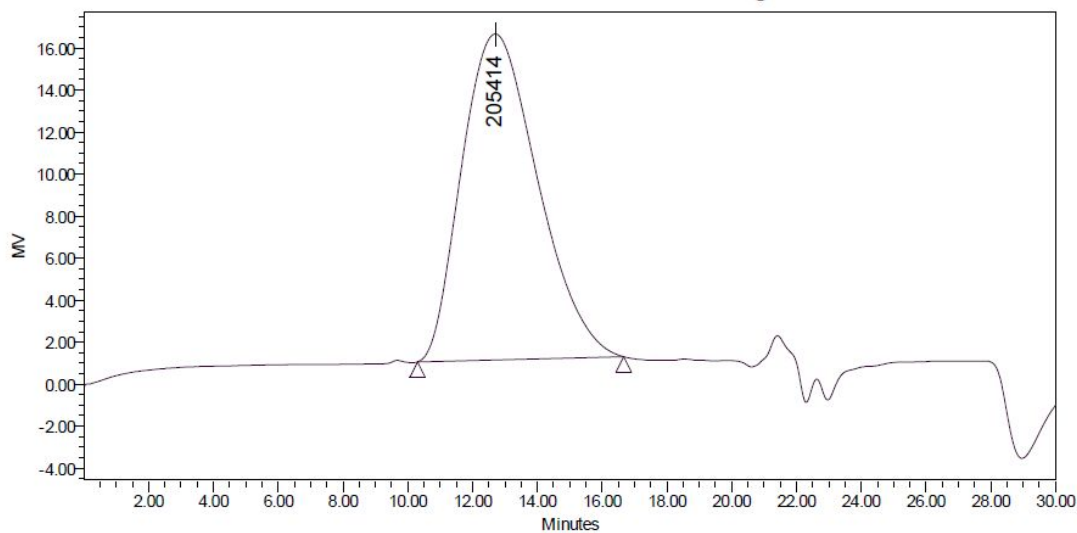

**Broad Unknown Modified Universal Peak Table**

|   | Distribution Name | Mv (Daltons) | K (dl/g) | alpha | Intrinsic Viscosity (dl/g) | Mn (Daltons) | Mw (Daltons) | MP (Daltons) | Mz (Daltons) | Mz+1 (Daltons) | Polydispersity | Mz/Mw    |
|---|-------------------|--------------|----------|-------|----------------------------|--------------|--------------|--------------|--------------|----------------|----------------|----------|
| 1 |                   |              |          |       |                            | 77439        | 281900       | 205414       | 657661       | 1081943        | 3.640275       | 2.332958 |

**Figure S49.** GPC curve of Et<sub>3</sub>Si-end-functionalized poly(EPI) in Table 1, entry 3.

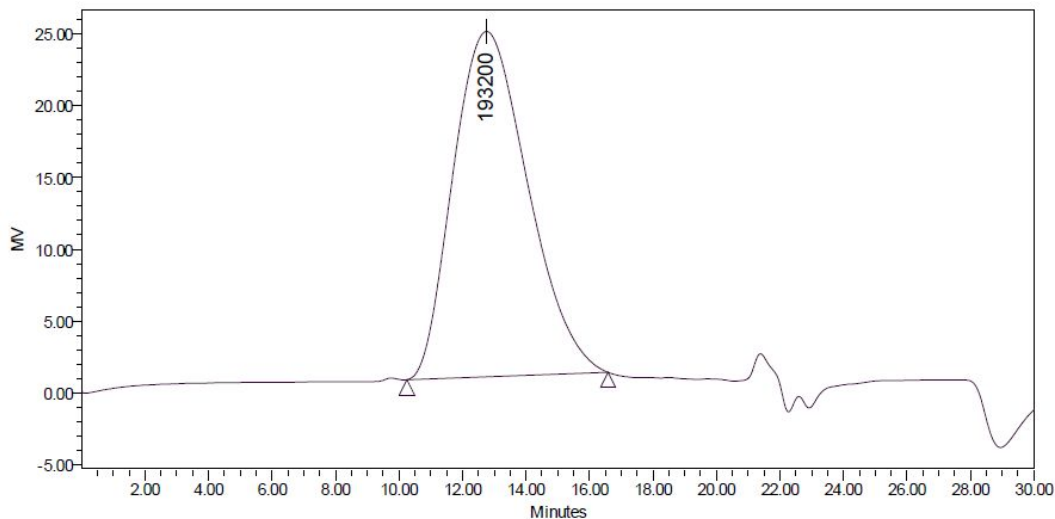

**Broad Unknown Modified Universal Peak Table**

|   | Distribution Name | Mv (Daltons) | K (dl/g) | alpha | Intrinsic Viscosity (dl/g) | Mn (Daltons) | Mw (Daltons) | MP (Daltons) | Mz (Daltons) | Mz+1 (Daltons) | Polydispersity | Mz/Mw    |
|---|-------------------|--------------|----------|-------|----------------------------|--------------|--------------|--------------|--------------|----------------|----------------|----------|
| 1 |                   |              |          |       |                            | 75636        | 272626       | 193200       | 648352       | 1087787        | 3.604437       | 2.378169 |

**Figure S49.** GPC curve of Et<sub>3</sub>Si-end-functionalized poly(EPI) in Table 1, entry 4.

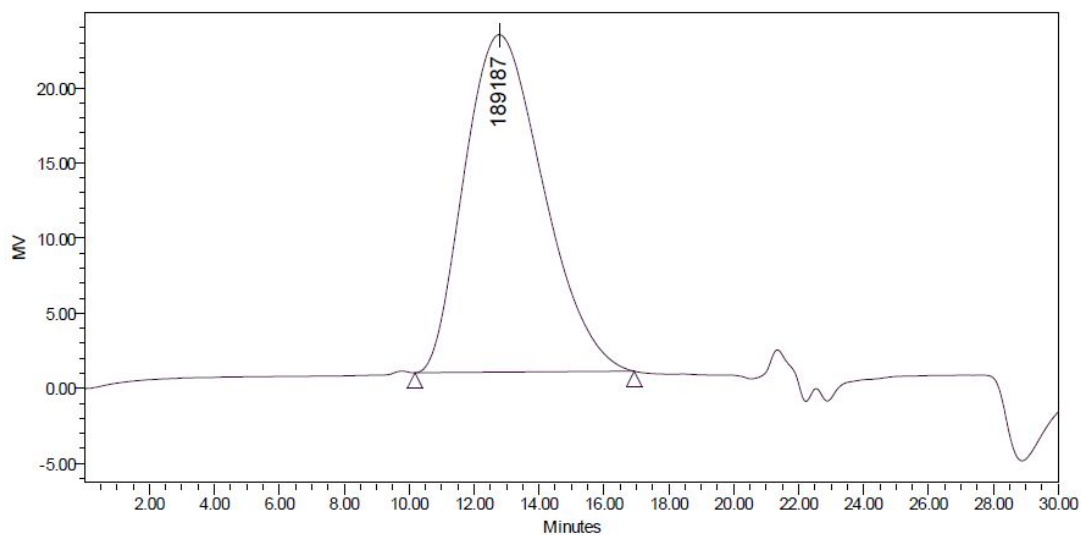

**Broad Unknown Modified Universal Peak Table**

|   | Distribution Name | Mv (Daltons) | K (dl/g) | alpha | Intrinsic Viscosity (dl/g) | Mn (Daltons) | Mw (Daltons) | MP (Daltons) | Mz (Daltons) | Mz+1 (Daltons) | Polydispersity | Mz/Mw    |
|---|-------------------|--------------|----------|-------|----------------------------|--------------|--------------|--------------|--------------|----------------|----------------|----------|
| 1 |                   |              |          |       |                            | 67507        | 268870       | 189187       | 665567       | 1132481        | 3.982856       | 2.475423 |

**Figure S49.** GPC curve of Et<sub>3</sub>Si-end-functionalized poly(EPI) in Table 1, entry 5.

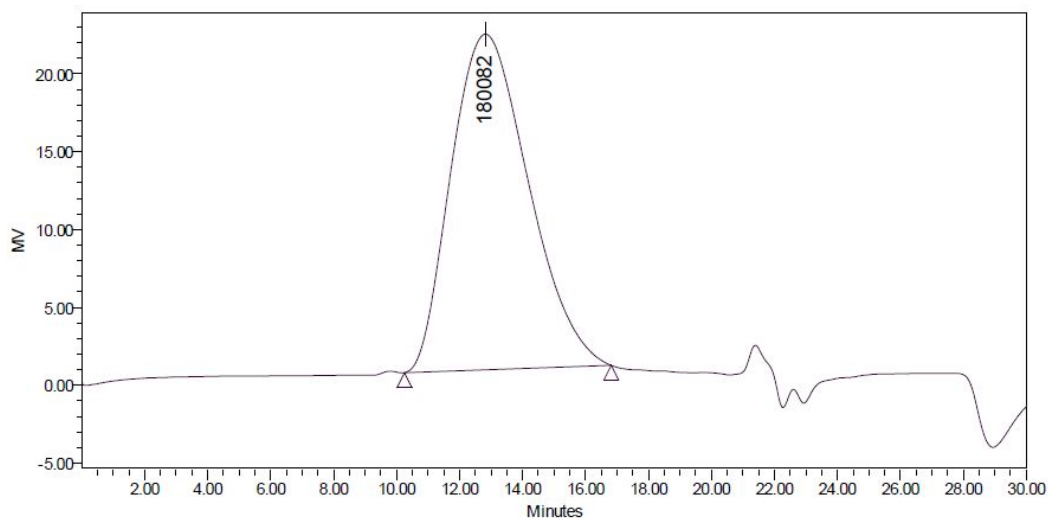

**Broad Unknown Modified Universal Peak Table**

|   | Distribution Name | Mv (Daltons) | K (dl/g) | alpha | Intrinsic Viscosity (dl/g) | Mn (Daltons) | Mw (Daltons) | MP (Daltons) | Mz (Daltons) | Mz+1 (Daltons) | Polydispersity | Mz/Mw    |
|---|-------------------|--------------|----------|-------|----------------------------|--------------|--------------|--------------|--------------|----------------|----------------|----------|
| 1 |                   |              |          |       |                            | 64750        | 259807       | 180082       | 645787       | 1093301        | 4.012448       | 2.485644 |

**Figure S50.** GPC curve of Et<sub>3</sub>Si-end-functionalized poly(EPI) in Table 1, entry 6.

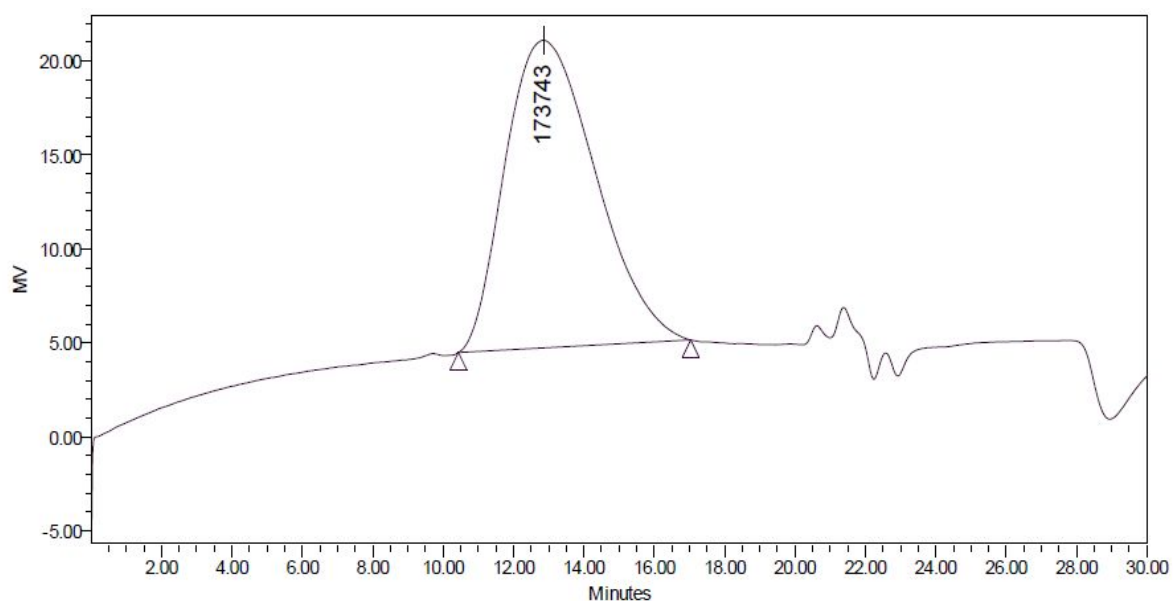

**Broad Unknown Modified Universal Peak Table**

|   | Distribution Name | Mv (Daltons) | K (dl/g) | alpha | Intrinsic Viscosity (dl/g) | Mn (Daltons) | Mw (Daltons) | MP (Daltons) | Mz (Daltons) | Mz+1 (Daltons) | Polydispersity | Mz/Mw    |
|---|-------------------|--------------|----------|-------|----------------------------|--------------|--------------|--------------|--------------|----------------|----------------|----------|
| 1 |                   |              |          |       |                            | 55478        | 237557       | 173743       | 589276       | 975952         | 4.282008       | 2.480563 |

**Figure S51.** GPC curve of Et<sub>3</sub>Si-end-functionalized poly(EPI) in Table 1, entry 7.

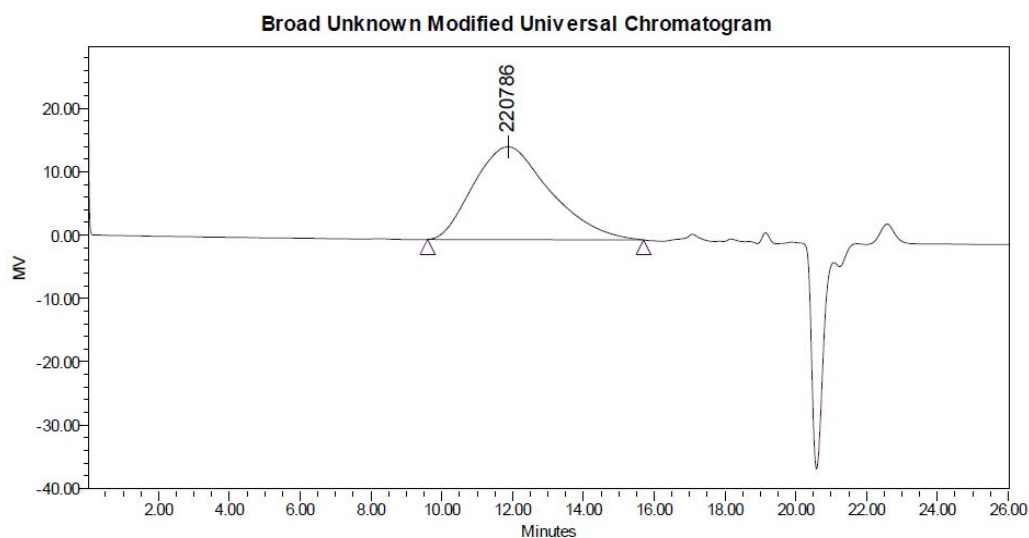

**Broad Unknown Modified Universal Peak Table**

|   | Distribution Name | Mv (Daltons) | K (dl/g) | alpha | Intrinsic Viscosity (dl/g) | Mn (Daltons) | Mw (Daltons) | MP (Daltons) | Mz (Daltons) | Mz+1 (Daltons) | Polydispersity | Mz/Mw    |
|---|-------------------|--------------|----------|-------|----------------------------|--------------|--------------|--------------|--------------|----------------|----------------|----------|
| 1 |                   |              |          |       |                            | 89222        | 289140       | 220786       | 612644       | 965680         | 3.240689       | 2.118850 |

**Figure S52.** GPC curve of Et<sub>3</sub>Si-end-functionalized poly(EPI) in Table 1, entry 8.

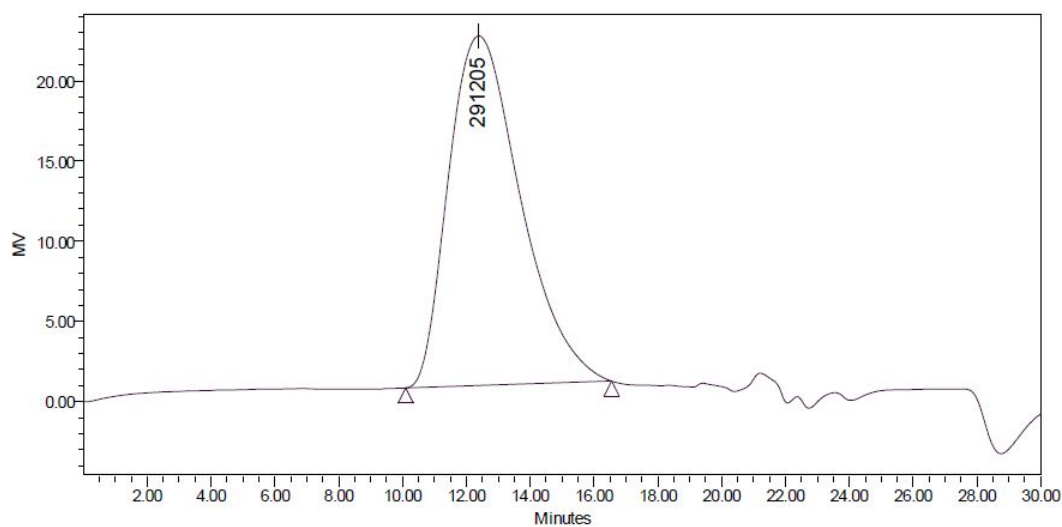

**Broad Unknown Modified Universal Peak Table**

|   | Distribution Name | Mv (Daltons) | K (dl/g) | alpha | Intrinsic Viscosity (dl/g) | Mn (Daltons) | Mw (Daltons) | MP (Daltons) | Mz (Daltons) | Mz+1 (Daltons) | Polydispersity | Mz/Mw    |
|---|-------------------|--------------|----------|-------|----------------------------|--------------|--------------|--------------|--------------|----------------|----------------|----------|
| 1 |                   |              |          |       |                            | 95716        | 356640       | 291205       | 783629       | 1253092        | 3.715588       | 2.203431 |

**Figure S53.** GPC curve of Et<sub>3</sub>Si-End-Functionalized Poly(EPI) in Table 1, entry 9.

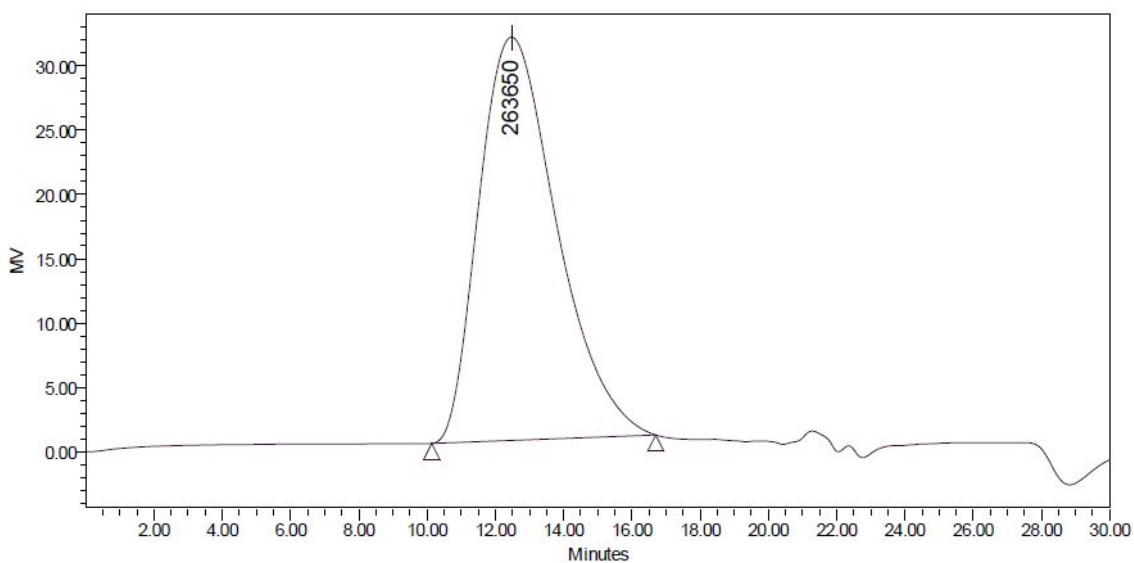

**Broad Unknown Modified Universal Peak Table**

|   | Distribution Name | Mv (Daltons) | K (dl/g) | alpha | Intrinsic Viscosity (dl/g) | Mn (Daltons) | Mw (Daltons) | MP (Daltons) | Mz (Daltons) | Mz+1 (Daltons) | Polydispersity | Mz/Mw    |
|---|-------------------|--------------|----------|-------|----------------------------|--------------|--------------|--------------|--------------|----------------|----------------|----------|
| 1 |                   |              |          |       |                            | 86536        | 326841       | 263650       | 733599       | 1189990        | 3.776956       | 2.244511 |

**Figure S54.** GPC curve of Et<sub>3</sub>Si-end-functionalized poly(EPI) in Table 1, entry 10.

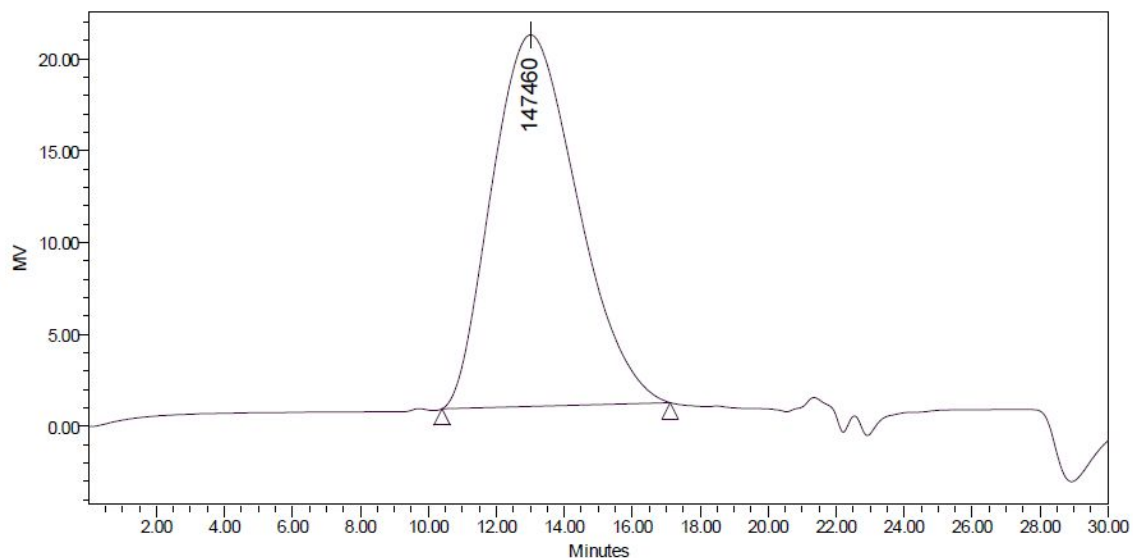

**Broad Unknown Modified Universal Peak Table**

|   | Distribution Name | Mv (Daltons) | K (dl/g) | alpha | Intrinsic Viscosity (dl/g) | Mn (Daltons) | Mw (Daltons) | MP (Daltons) | Mz (Daltons) | Mz+1 (Daltons) | Polydispersity | Mz/Mw    |
|---|-------------------|--------------|----------|-------|----------------------------|--------------|--------------|--------------|--------------|----------------|----------------|----------|
| 1 |                   |              |          |       |                            | 53165        | 224438       | 147460       | 579055       | 988682         | 4.221503       | 2.580021 |

**Figure S55.** GPC curve of Et<sub>3</sub>Si-end-functionalized poly(EPI) in Table 1, entry 11.

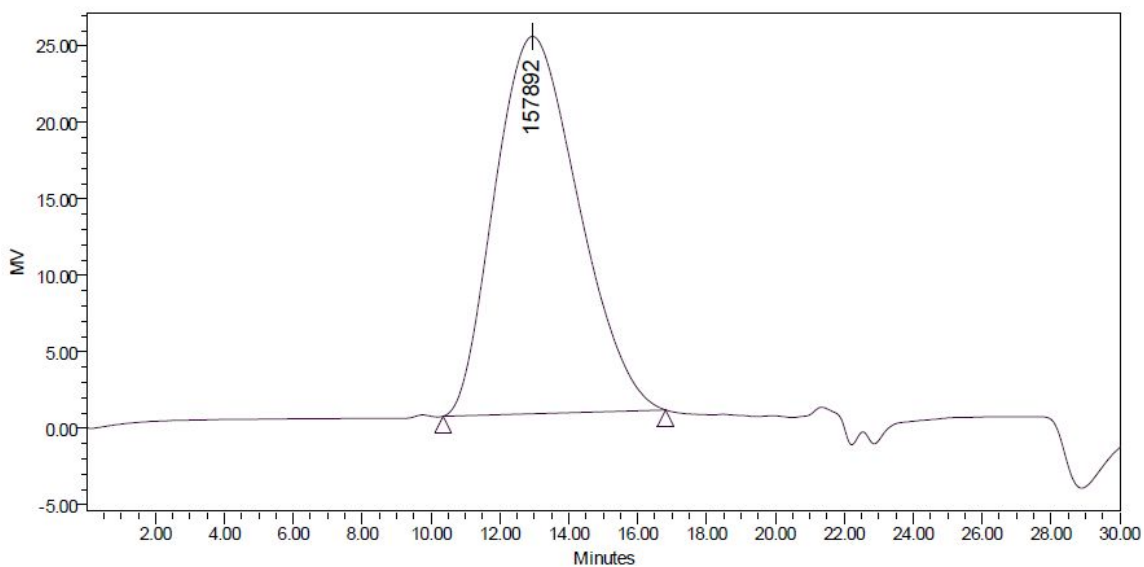

**Broad Unknown Modified Universal Peak Table**

|   | Distribution Name | Mv (Daltons) | K (dl/g) | alpha | Intrinsic Viscosity (dl/g) | Mn (Daltons) | Mw (Daltons) | MP (Daltons) | Mz (Daltons) | Mz+1 (Daltons) | Polydispersity | Mz/Mw    |
|---|-------------------|--------------|----------|-------|----------------------------|--------------|--------------|--------------|--------------|----------------|----------------|----------|
| 1 |                   |              |          |       |                            | 61134        | 231339       | 157892       | 576059       | 984709         | 3.784110       | 2.490105 |

**Figure S56.** GPC curve of Et<sub>3</sub>Si-end-functionalized poly(EPI) in Table 1, entry 12.



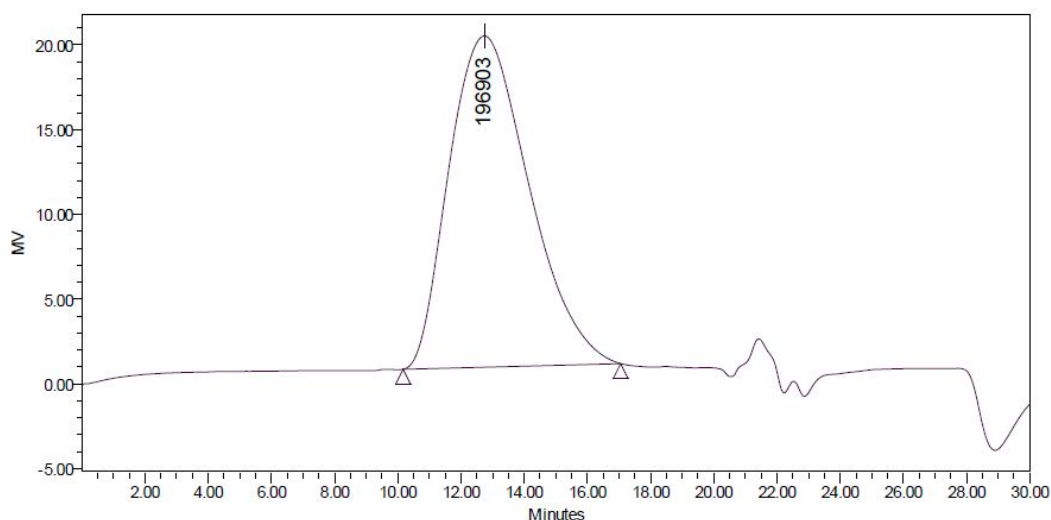

**Broad Unknown Modified Universal Peak Table**

|   | Distribution Name | Mv (Daltons) | K (dl/g) | alpha | Intrinsic Viscosity (dl/g) | Mn (Daltons) | Mw (Daltons) | MP (Daltons) | Mz (Daltons) | Mz+1 (Daltons) | Polydispersity | Mz/Mw    |
|---|-------------------|--------------|----------|-------|----------------------------|--------------|--------------|--------------|--------------|----------------|----------------|----------|
| 1 |                   |              |          |       |                            | 63580        | 286366       | 196903       | 726279       | 1225562        | 4.504001       | 2.536188 |

**Figure S57.** GPC curve of Et<sub>3</sub>Si-end-functionalized poly(EPI) in Table 1, entry 13.

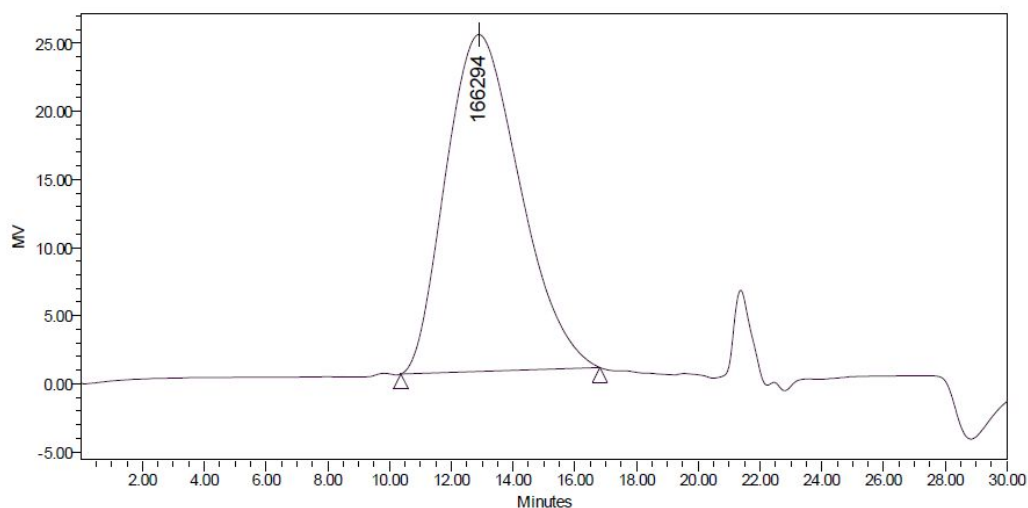

**Broad Unknown Modified Universal Peak Table**

|   | Distribution Name | Mv (Daltons) | K (dl/g) | alpha | Intrinsic Viscosity (dl/g) | Mn (Daltons) | Mw (Daltons) | MP (Daltons) | Mz (Daltons) | Mz+1 (Daltons) | Polydispersity | Mz/Mw    |
|---|-------------------|--------------|----------|-------|----------------------------|--------------|--------------|--------------|--------------|----------------|----------------|----------|
| 1 |                   |              |          |       |                            | 62297        | 239798       | 166294       | 590950       | 1002743        | 3.849237       | 2.464370 |

**Figure S58.** GPC curve of Et<sub>3</sub>Si-end-functionalized poly(EPI) in Table 1, entry 14.



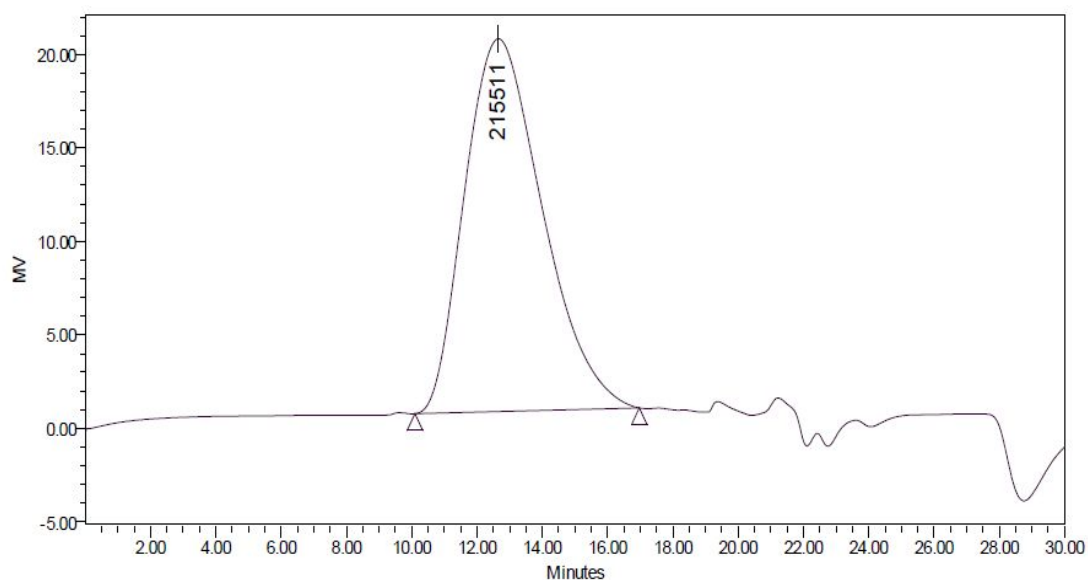

**Broad Unknown Modified Universal Peak Table**

|   | Distribution Name | Mv (Daltons) | K (dl/g) | alpha | Intrinsic Viscosity (dl/g) | Mn (Daltons) | Mw (Daltons) | MP (Daltons) | Mz (Daltons) | Mz+1 (Daltons) | Polydispersity | Mz/Mw    |
|---|-------------------|--------------|----------|-------|----------------------------|--------------|--------------|--------------|--------------|----------------|----------------|----------|
| 1 |                   |              |          |       |                            | 72213        | 295664       | 215511       | 721397       | 1226832        | 4.094348       | 2.439918 |

**Figure S59.** GPC curve of Et<sub>3</sub>Si-end-functionalized poly(EPI) in Table 1, entry 15.

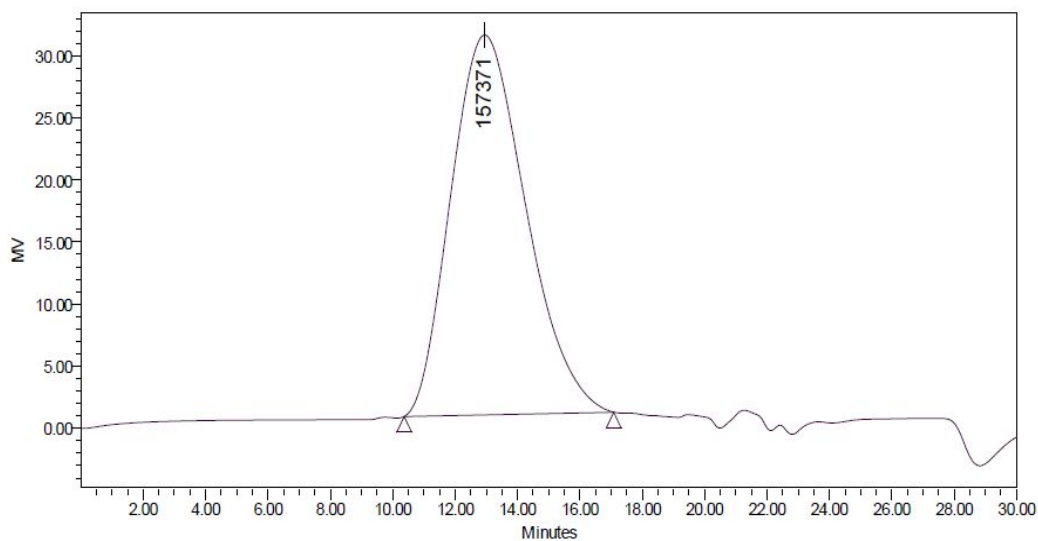

**Broad Unknown Modified Universal Peak Table**

|   | Distribution Name | Mv (Daltons) | K (dl/g) | alpha | Intrinsic Viscosity (dl/g) | Mn (Daltons) | Mw (Daltons) | MP (Daltons) | Mz (Daltons) | Mz+1 (Daltons) | Polydispersity | Mz/Mw    |
|---|-------------------|--------------|----------|-------|----------------------------|--------------|--------------|--------------|--------------|----------------|----------------|----------|
| 1 |                   |              |          |       |                            | 58365        | 232014       | 157371       | 585538       | 1012901        | 3.975224       | 2.523718 |

**Figure S60.** GPC curve of Et<sub>3</sub>Si-end-functionalized poly(EPI) in Table 1, entry 16.

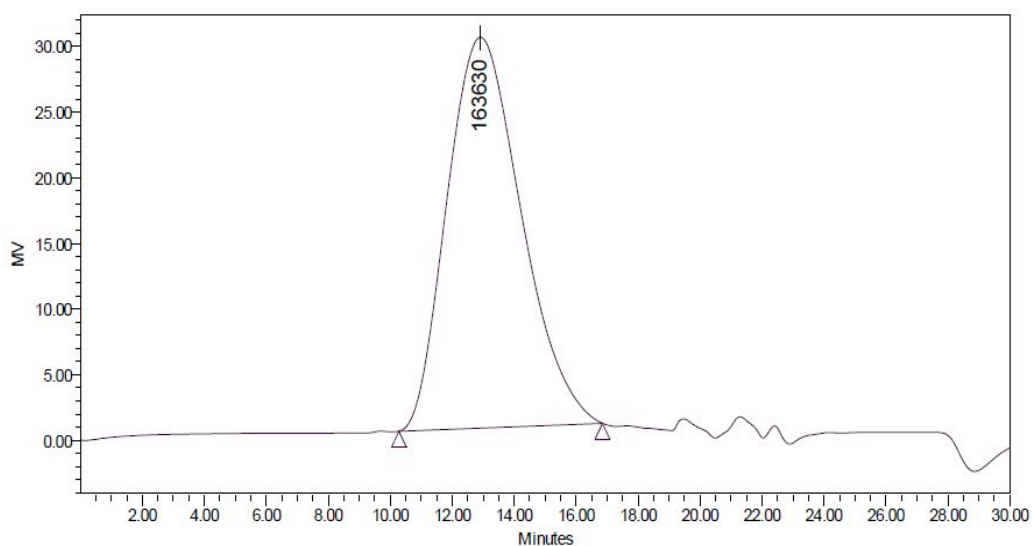

**Broad Unknown Modified Universal Peak Table**

|   | Distribution Name | Mv (Daltons) | K (dl/g) | alpha | Intrinsic Viscosity (dl/g) | Mn (Daltons) | Mw (Daltons) | MP (Daltons) | Mz (Daltons) | Mz+1 (Daltons) | Polydispersity | Mz/Mw    |
|---|-------------------|--------------|----------|-------|----------------------------|--------------|--------------|--------------|--------------|----------------|----------------|----------|
| 1 |                   |              |          |       |                            | 61905        | 238908       | 163630       | 596029       | 1033177        | 3.859246       | 2.494803 |

**Figure S61.** GPC curve of Et<sub>3</sub>Si-end-functionalized poly(EPI) in Table 1, entry 17.

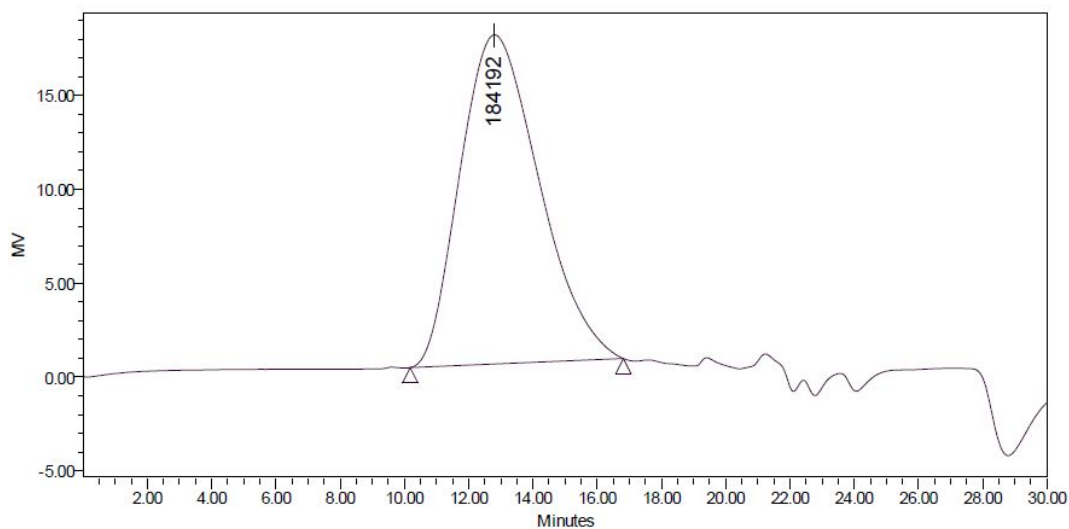

**Broad Unknown Modified Universal Peak Table**

|   | Distribution Name | Mv (Daltons) | K (dl/g) | alpha | Intrinsic Viscosity (dl/g) | Mn (Daltons) | Mw (Daltons) | MP (Daltons) | Mz (Daltons) | Mz+1 (Daltons) | Polydispersity | Mz/Mw    |
|---|-------------------|--------------|----------|-------|----------------------------|--------------|--------------|--------------|--------------|----------------|----------------|----------|
| 1 |                   |              |          |       |                            | 63232        | 262249       | 184192       | 672196       | 1168290        | 4.147401       | 2.563199 |

**Figure S62.** GPC curve of Et<sub>3</sub>Si-end-functionalized poly(EPI) in Table 1, entry 18.

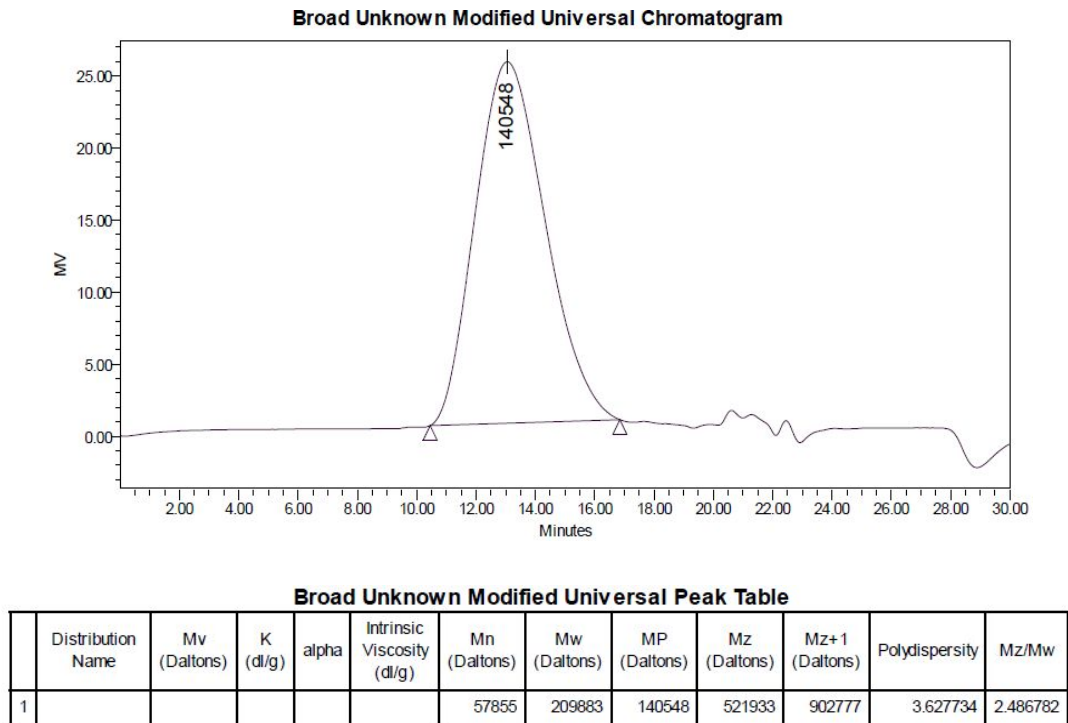

**Figure S63.** GPC curve of PhMe<sub>2</sub>Si-end-functionalized poly(EPI) in Table 2, entry 1.

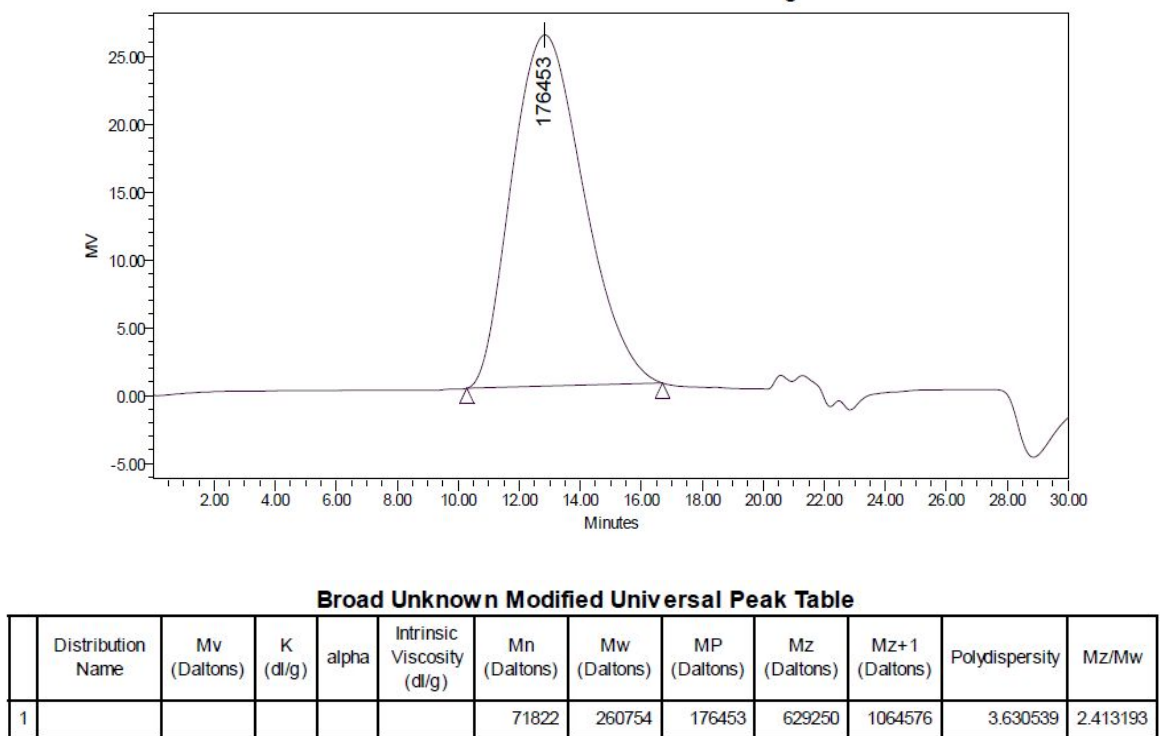

**Figure S64.** GPC curve of (4-*i*PrC<sub>6</sub>H<sub>4</sub>)Me<sub>2</sub>Si-end-functionalized poly(EPI) in [Table 2, entry 2](#).

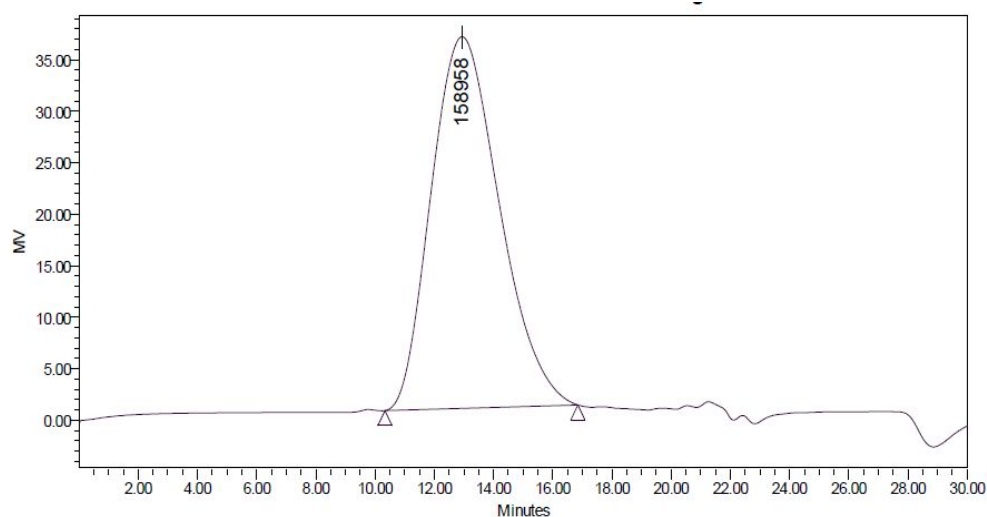

**Broad Unknown Modified Universal Peak Table**

|   | Distribution Name | Mv (Daltons) | K (dl/g) | alpha | Intrinsic Viscosity (dl/g) | Mn (Daltons) | Mw (Daltons) | MP (Daltons) | Mz (Daltons) | Mz+1 (Daltons) | Polydispersity | Mz/Mw    |
|---|-------------------|--------------|----------|-------|----------------------------|--------------|--------------|--------------|--------------|----------------|----------------|----------|
| 1 |                   |              |          |       |                            | 64122        | 226677       | 158958       | 540900       | 928216         | 3.535077       | 2.386221 |

**Figure S65.** GPC curve of Ph<sub>3</sub>Si-end-functionalized poly(EPI) in [Table 2, entry 3](#).

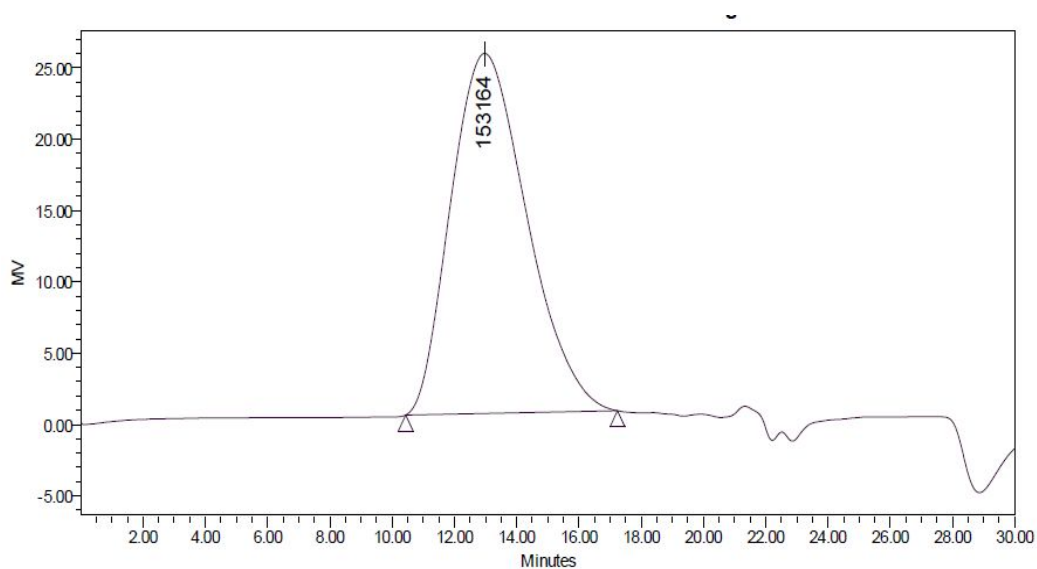

**Broad Unknown Modified Universal Peak Table**

|   | Distribution Name | Mv (Daltons) | K (dl/g) | alpha | Intrinsic Viscosity (dl/g) | Mn (Daltons) | Mw (Daltons) | MP (Daltons) | Mz (Daltons) | Mz+1 (Daltons) | Polydispersity | Mz/Mw    |
|---|-------------------|--------------|----------|-------|----------------------------|--------------|--------------|--------------|--------------|----------------|----------------|----------|
| 1 |                   |              |          |       |                            | 54327        | 220242       | 153164       | 546000       | 925151         | 4.054013       | 2.479095 |

**Figure S66.** GPC curve of  $i\text{Pr}_3\text{Si}$ -end-functionalized poly(EPI) in Table 2, entry 5.

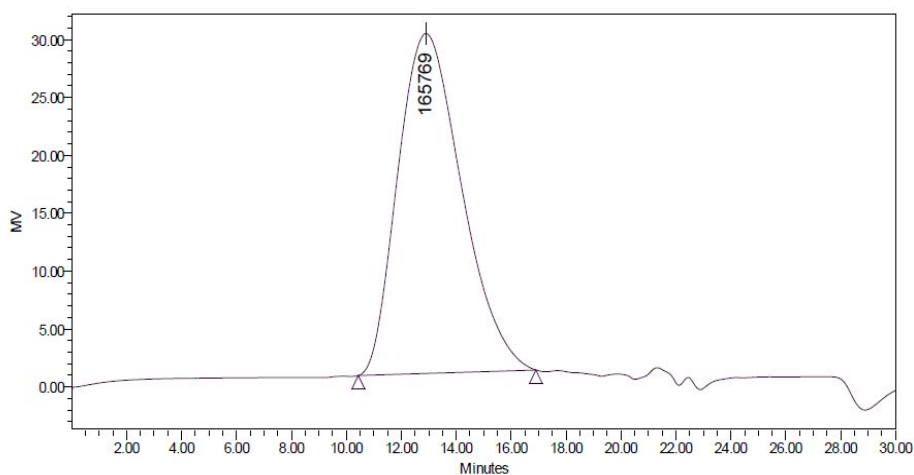

**Broad Unknown Modified Universal Peak Table**

|   | Distribution Name | Mv (Daltons) | K (dl/g) | alpha | Intrinsic Viscosity (dl/g) | Mn (Daltons) | Mw (Daltons) | MP (Daltons) | Mz (Daltons) | Mz+1 (Daltons) | Polydispersity | Mz/Mw    |
|---|-------------------|--------------|----------|-------|----------------------------|--------------|--------------|--------------|--------------|----------------|----------------|----------|
| 1 |                   |              |          |       |                            | 62394        | 225135       | 165769       | 522785       | 869546         | 3.608279       | 2.322095 |

**Figure S67.** GPC curve of  $(\text{OEt})_3\text{Si}$ -end-functionalized poly(EPI) in Table 2, entry 6.

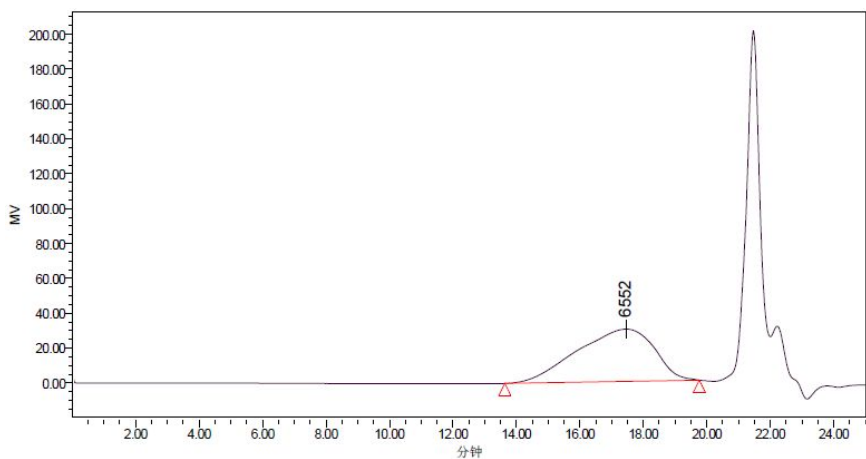

**GPC Results**

|   | Dist Name | Elution Volume (ml) | Retention Time (min) | Adjusted RT (min) | Mn   | Mw    | MP   | Mz    | Mz+1  | Mz/Mw    | Mz+1/Mw  |
|---|-----------|---------------------|----------------------|-------------------|------|-------|------|-------|-------|----------|----------|
| 1 |           | 17.457              | 17.457               | 17.457            | 6920 | 11488 | 6552 | 20113 | 32894 | 1.750815 | 2.863346 |

**Figure S68.** GPC curve of  $(\text{OEt})_3\text{Si}$ -end-functionalized poly(EPI) in Table 2, entry 7.

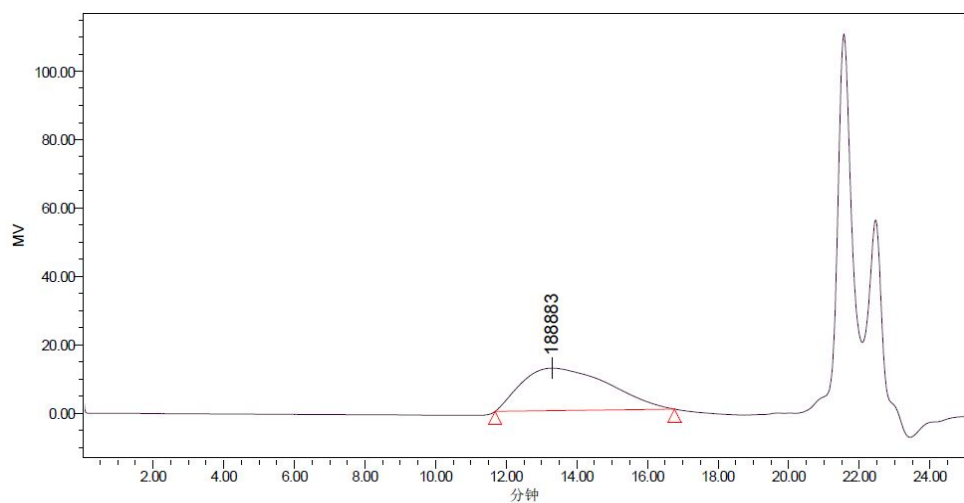

**GPC Results**

|   | Dist Name | Elution Volume (ml) | Retention Time (min) | Adjusted RT (min) | Mn    | Mw     | MP     | Mz     | Mz+1    | Mz/Mw    |
|---|-----------|---------------------|----------------------|-------------------|-------|--------|--------|--------|---------|----------|
| 1 |           | 13.307              | 13.307               | 13.307            | 68717 | 232328 | 188883 | 626163 | 1032547 | 2.695171 |

**Figure S69.** GPC curve of Et<sub>3</sub>Si-end-functionalized poly(ITPP) in [Table 2, entry 8](#).

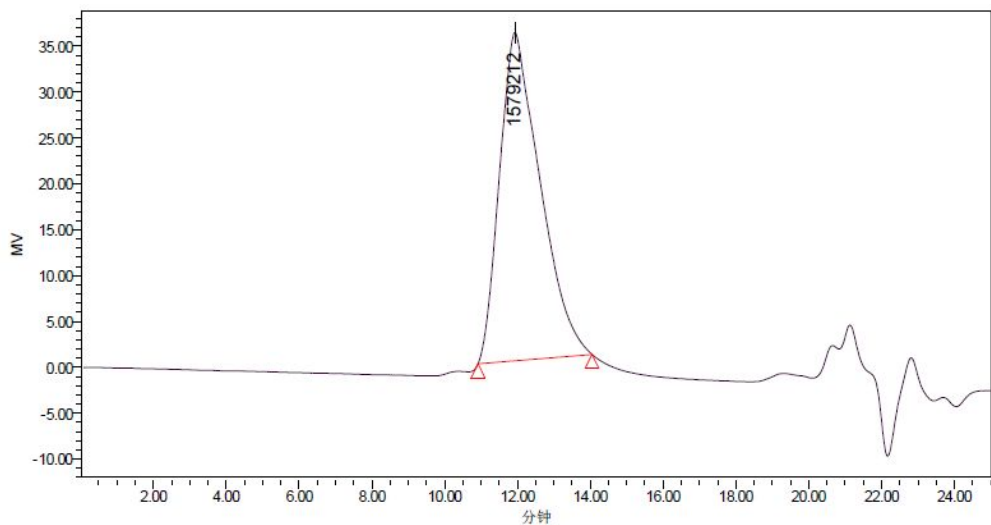

**GPC Results**

|   | Dist Name | Elution Volume (ml) | Retention Time (min) | Adjusted RT (min) | Mn     | Mw      | MP      | Mz      | Mz+1    | Mz/Mw    |
|---|-----------|---------------------|----------------------|-------------------|--------|---------|---------|---------|---------|----------|
| 1 |           | 11.930              | 11.930               | 11.930            | 711137 | 1643957 | 1579212 | 3131660 | 4798522 | 1.904953 |

**Figure S70.** GPC curve of Et<sub>3</sub>Si-end-functionalized poly(ITPPA) in [Table 2, entry 9](#).

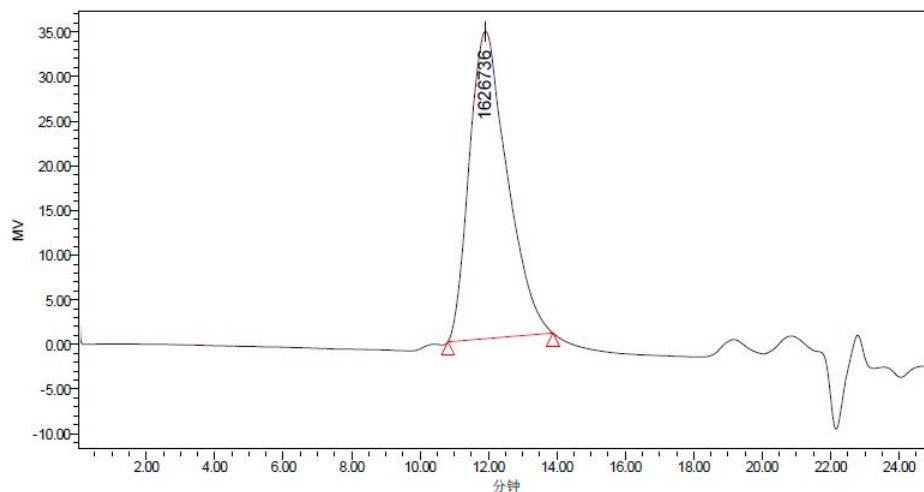

**GPC Results**

|   | Dist Name | Elution Volume (ml) | Retention Time (min) | Adjusted RT (min) | Mn     | Mw      | MP      | Mz      | Mz+1    | Mz/Mw    |
|---|-----------|---------------------|----------------------|-------------------|--------|---------|---------|---------|---------|----------|
| 1 |           | 11.914              | 11.914               | 11.914            | 837738 | 1919038 | 1626736 | 3708980 | 5803431 | 1.932729 |

**Figure S71.** GPC curve of Et<sub>3</sub>Si-end-functionalized poly(D-IMCI) in [Table 2, entry 10](#)

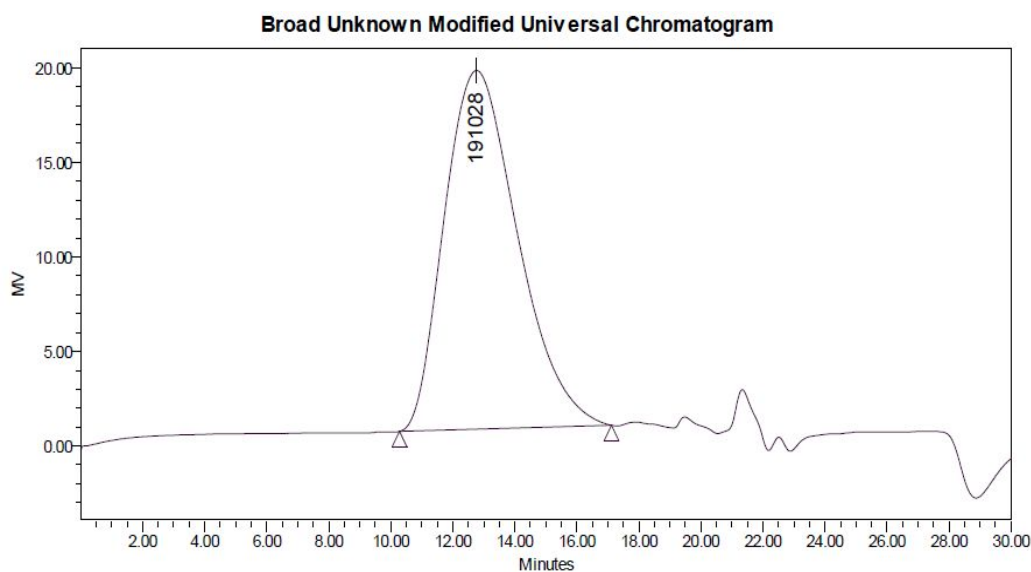

**Broad Unknown Modified Universal Peak Table**

|   | Distribution Name | Mv (Daltons) | K (dl/g) | alpha | Intrinsic Viscosity (dl/g) | Mn (Daltons) | Mw (Daltons) | MP (Daltons) | Mz (Daltons) | Mz+1 (Daltons) | Polydispersity | Mz/Mw    |
|---|-------------------|--------------|----------|-------|----------------------------|--------------|--------------|--------------|--------------|----------------|----------------|----------|
| 1 |                   |              |          |       |                            | 65341        | 262042       | 191028       | 623403       | 1043958        | 4.010387       | 2.379017 |

**Figure S72.** GPC curve of PhSi-end-functionalized star poly(EPI) in [Table 3, entry 1](#).



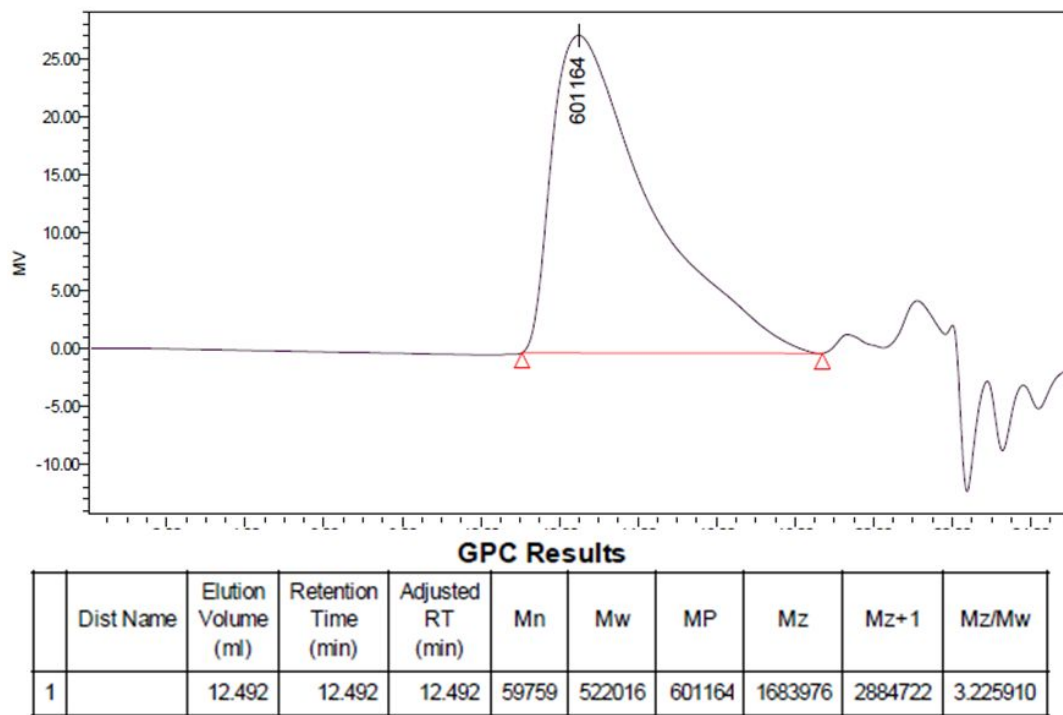

**Figure S73.** GPC curve of C<sub>6</sub>H<sub>3</sub>-1,3,5-(Me<sub>2</sub>Si)<sub>3</sub>-end-functionalized poly(D-IMCI) in [Table 3, entry 2](#).

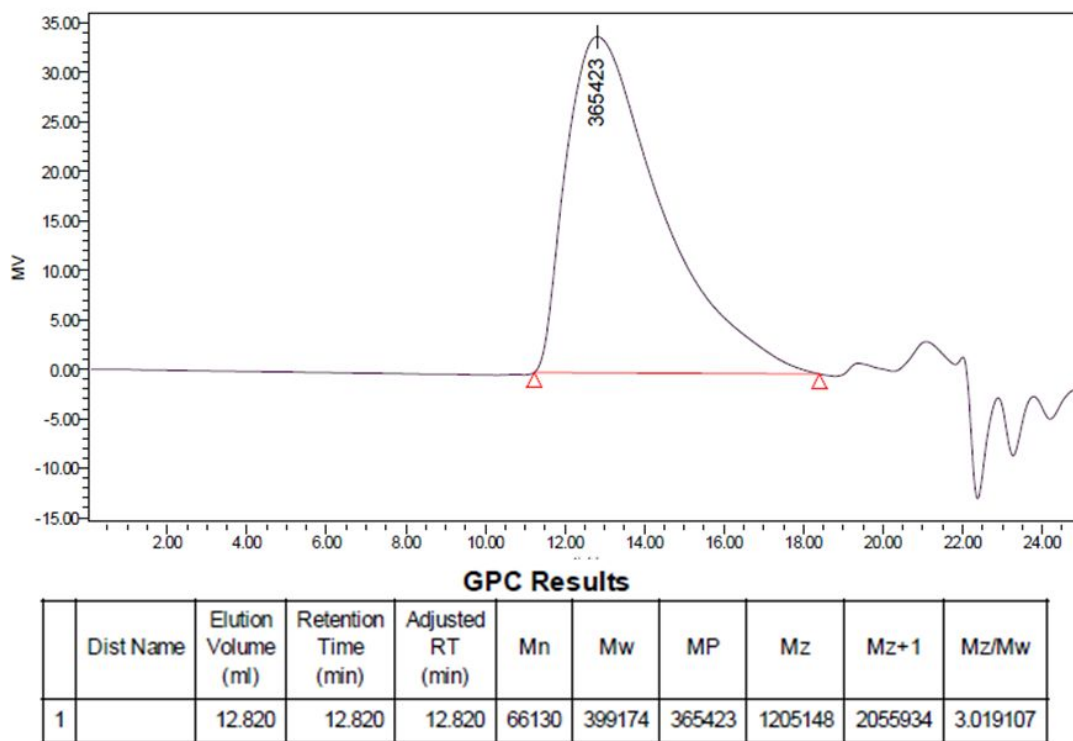

**Figure S74.** GPC curve of C<sub>6</sub>H<sub>3</sub>-1,3,5-(Me<sub>2</sub>Si)<sub>3</sub>-end-functionalized poly(L-IMCI) in [Table 3, entry 3](#).



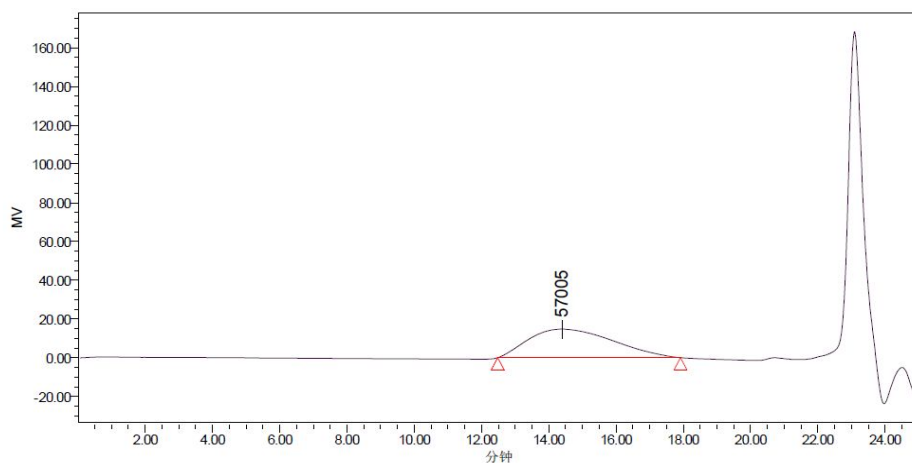

**GPC Results**

|   | Dist Name | Elution Volume (ml) | Retention Time (min) | Adjusted RT (min) | Mn    | Mw    | MP    | Mz     | Mz+1   | Mz/Mw    | Mz+1/Mw  |
|---|-----------|---------------------|----------------------|-------------------|-------|-------|-------|--------|--------|----------|----------|
| 1 |           | 14.408              | 14.408               | 14.408            | 30620 | 69992 | 57005 | 147851 | 236310 | 2.112394 | 3.376241 |

**Figure S75.** GPC curve of  $C_6H_3$ -1,3,5-( $Me_2Si$ )<sub>3</sub>-end-functionalized poly(D-IMCI-*co*-ITPPA) in Table 3, entry 4.

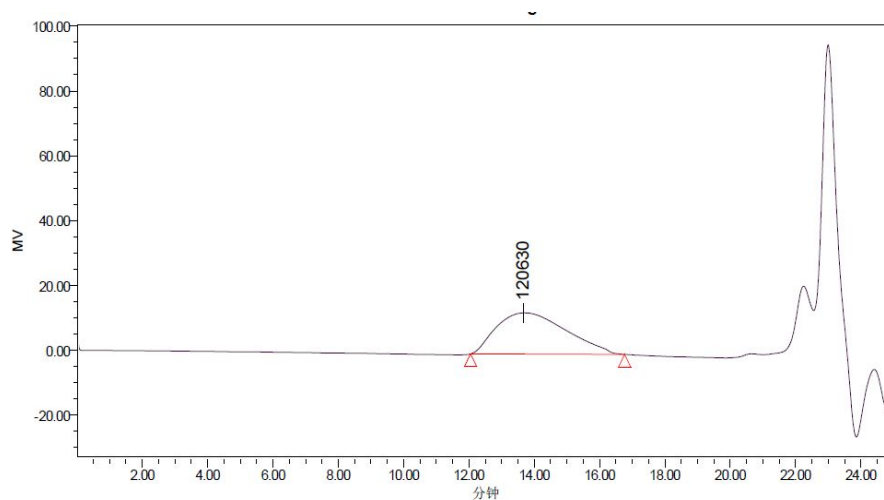

**GPC Results**

|   | Dist Name | Elution Volume (ml) | Retention Time (min) | Adjusted RT (min) | Mn    | Mw     | MP     | Mz     | Mz+1   | Mz/Mw    |
|---|-----------|---------------------|----------------------|-------------------|-------|--------|--------|--------|--------|----------|
| 1 |           | 13.681              | 13.681               | 13.681            | 61084 | 143429 | 120630 | 300062 | 469015 | 2.092061 |

**Figure S76.** GPC curve of  $C_6H_3$ -1,3,5-( $Me_2Si$ )<sub>3</sub>-end-functionalized poly(D-IMCI-*co*-ITPPA) in Table 3, entry 5.

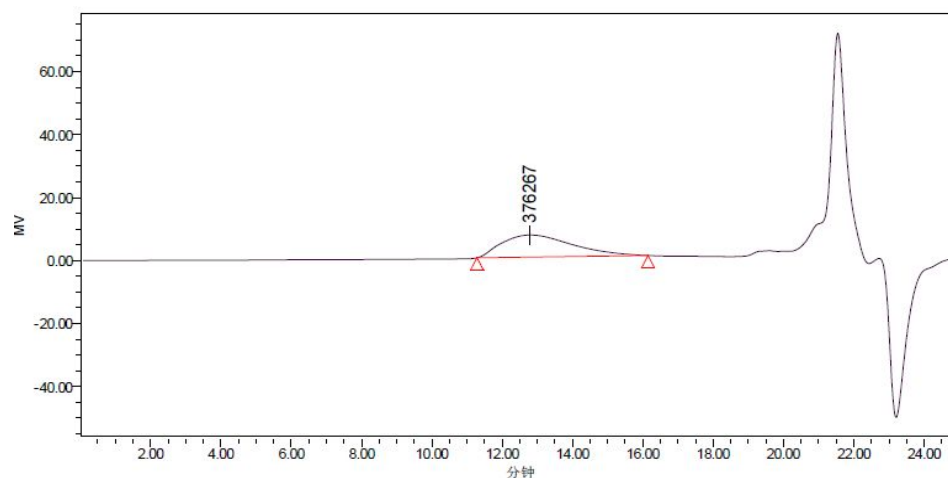

**GPC Results**

|   | Dist Name | Elution Volume (ml) | Retention Time (min) | Adjusted RT (min) | Mn     | Mw     | MP     | Mz      | Mz+1    | Mz/Mw    |
|---|-----------|---------------------|----------------------|-------------------|--------|--------|--------|---------|---------|----------|
| 1 |           | 12.800              | 12.800               | 12.800            | 142082 | 524779 | 376267 | 1376036 | 2241342 | 2.622126 |

**Figure S77.** GPC curve of  $C_6H_3$ -1,3,5-( $Me_2Si$ )<sub>3</sub>-end-functionalized poly(D-IMCI-*co*-ITPPA) in Table 3, entry 6.

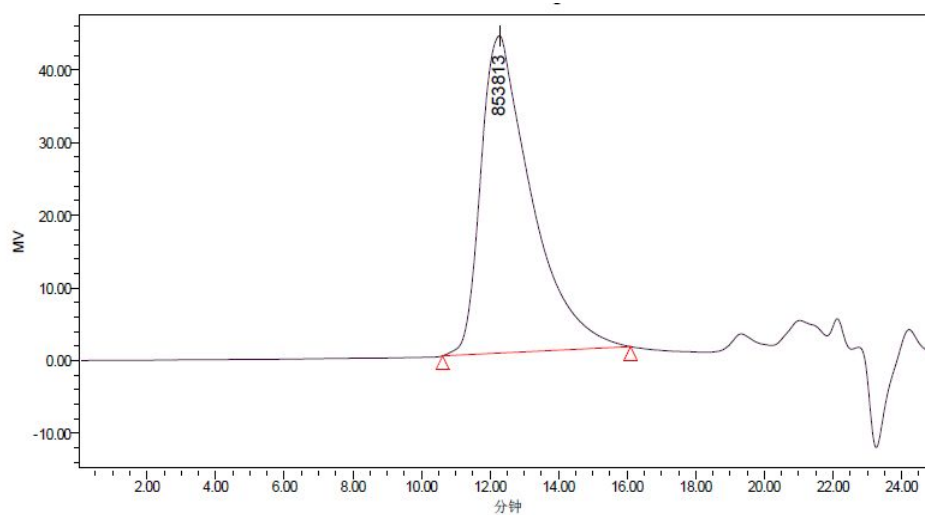

**GPC Results**

|   | Dist Name | Elution Volume (ml) | Retention Time (min) | Adjusted RT (min) | Mn     | Mw     | MP     | Mz      | Mz+1    | Mz/Mw    |
|---|-----------|---------------------|----------------------|-------------------|--------|--------|--------|---------|---------|----------|
| 1 |           | 12.278              | 12.278               | 12.278            | 251163 | 925273 | 853813 | 2518422 | 6204822 | 2.721816 |

**Figure S78.** GPC curve of  $C_6H_3$ -1,3,5-( $Me_2Si$ )<sub>3</sub>-end-functionalized poly(D-IMCI-*co*-ITPPA) in Table 3, entry 7.

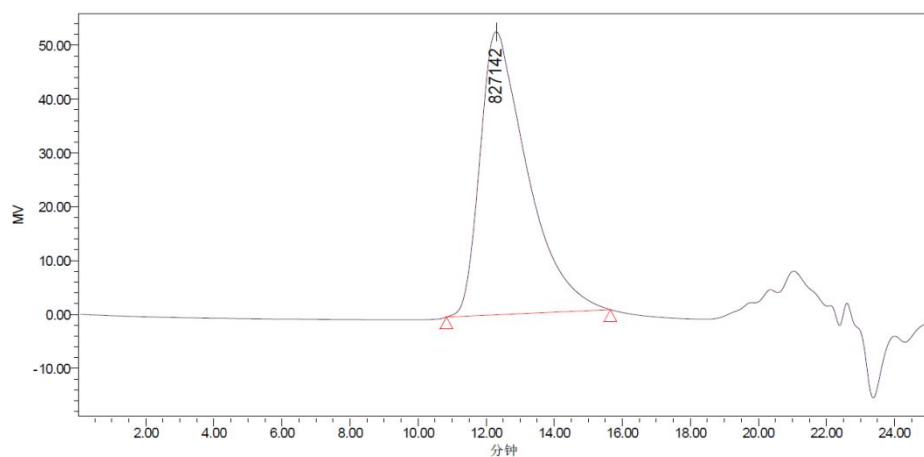

**GPC Results**

|   | Dist Name | Elution Volume (ml) | Retention Time (min) | Adjusted RT (min) | Mn     | Mw     | MP     | Mz      | Mz+1    | Mz/Mw    |
|---|-----------|---------------------|----------------------|-------------------|--------|--------|--------|---------|---------|----------|
| 1 |           | 12.297              | 12.297               | 12.297            | 270146 | 809970 | 827142 | 1831794 | 3505487 | 2.261558 |

**Figure S79.** GPC curve of  $C_6H_3$ -1,3,5-( $Me_2Si$ )<sub>3</sub>-end-functionalized poly(D-IMCI-*co*-ITPPA) in Table 3, entry 8.

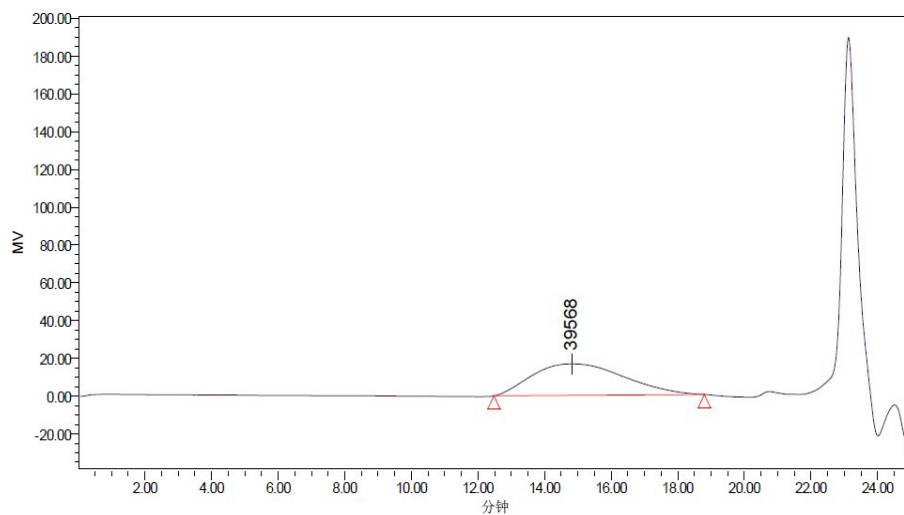

**GPC Results**

|   | Dist Name | Elution Volume (ml) | Retention Time (min) | Adjusted RT (min) | Mn    | Mw    | MP    | Mz     | Mz+1   | Mz/Mw    | Mz+1/Mw  |
|---|-----------|---------------------|----------------------|-------------------|-------|-------|-------|--------|--------|----------|----------|
| 1 |           | 14.821              | 14.821               | 14.821            | 22567 | 55195 | 39568 | 126988 | 216504 | 2.300719 | 3.922520 |

**Figure S80.** GPC curve of  $C_6H_3$ -1,3,5-( $Me_2Si$ )<sub>3</sub>-end-functionalized poly(L-IMCI-*co*-ITPPA) in Table 3, entry 9.

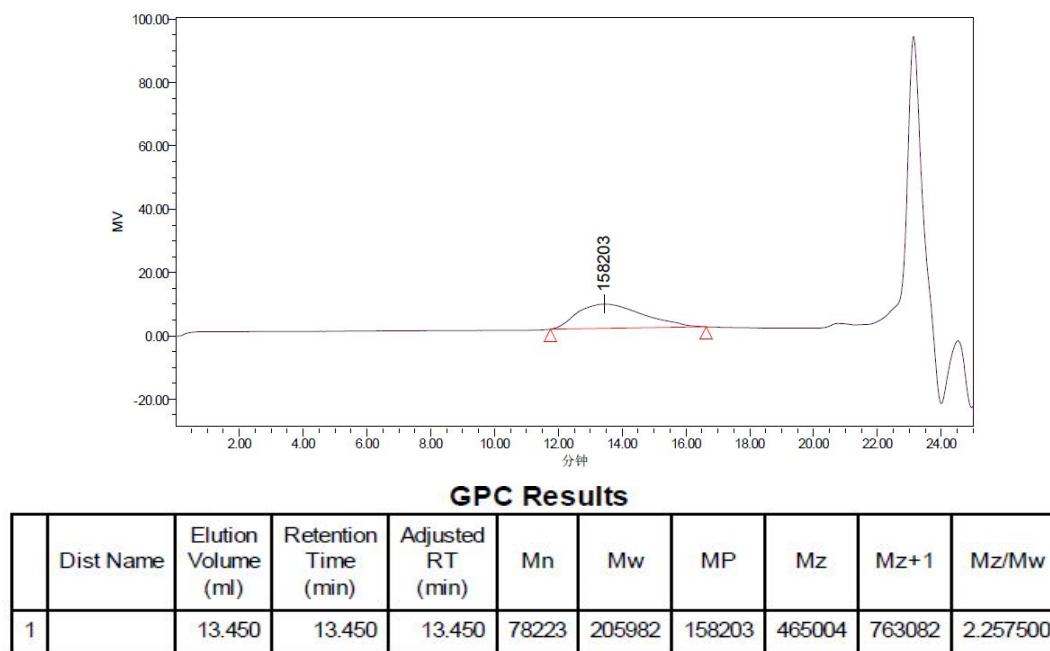

**Figure S81.** GPC curve of  $C_6H_3-1,3,5-(Me_2Si)_3$ -end-functionalized poly(L-IMCI-*co*-ITPPA) in Table 3, entry 10.

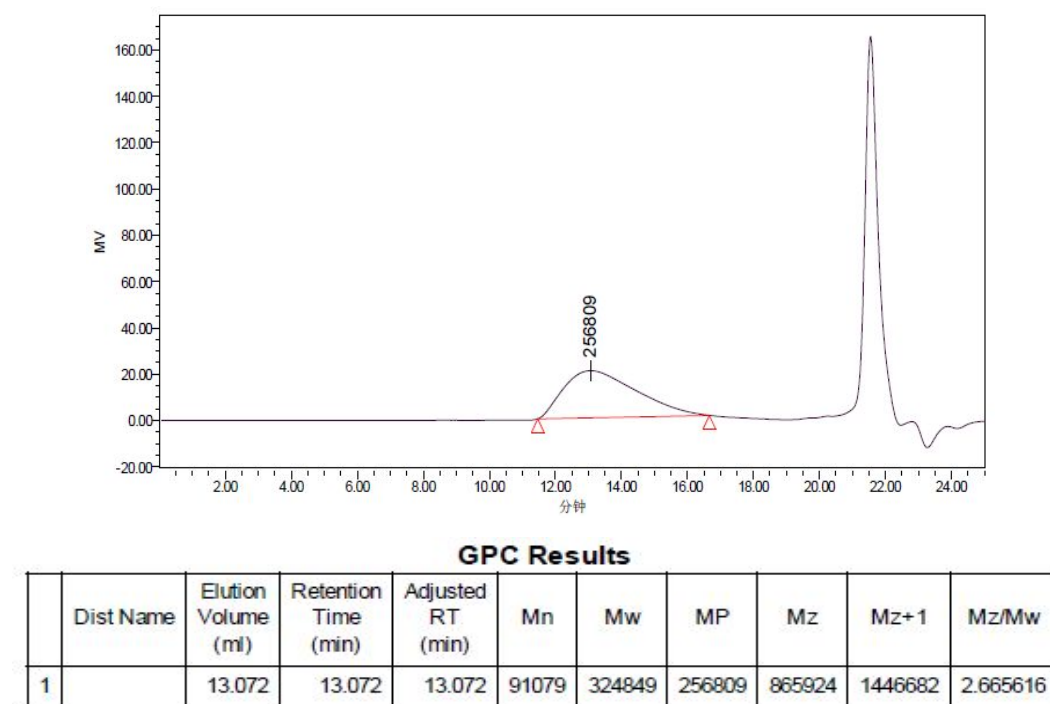

**Figure S82.** GPC curve of  $C_6H_3-1,3,5-(Me_2Si)_3$ -end-functionalized poly(L-IMCI-*co*-ITPPA) in Table 3, entry 11.

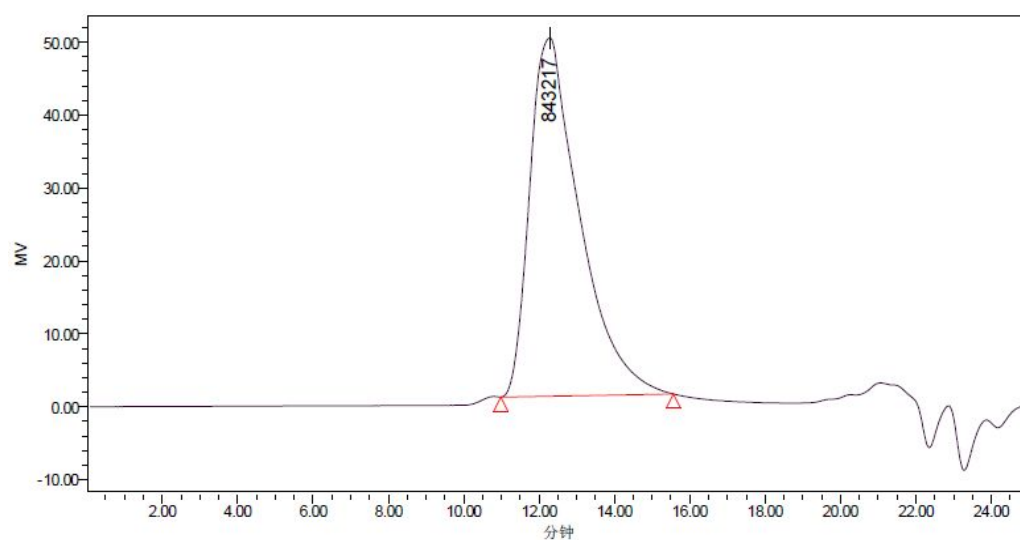

**GPC Results**

|   | Dist Name | Elution Volume (ml) | Retention Time (min) | Adjusted RT (min) | Mn     | Mw     | MP     | Mz      | Mz+1    | Mz/Mw    |
|---|-----------|---------------------|----------------------|-------------------|--------|--------|--------|---------|---------|----------|
| 1 |           | 12.285              | 12.285               | 12.285            | 323685 | 923617 | 843217 | 1871372 | 2980905 | 2.026134 |

**Figure S83.** GPC curve of  $C_6H_3$ -1,3,5-( $Me_2Si$ )<sub>3</sub>-end-functionalized poly(L-IMCI-*co*-ITPPA) in Table 3, entry 12.

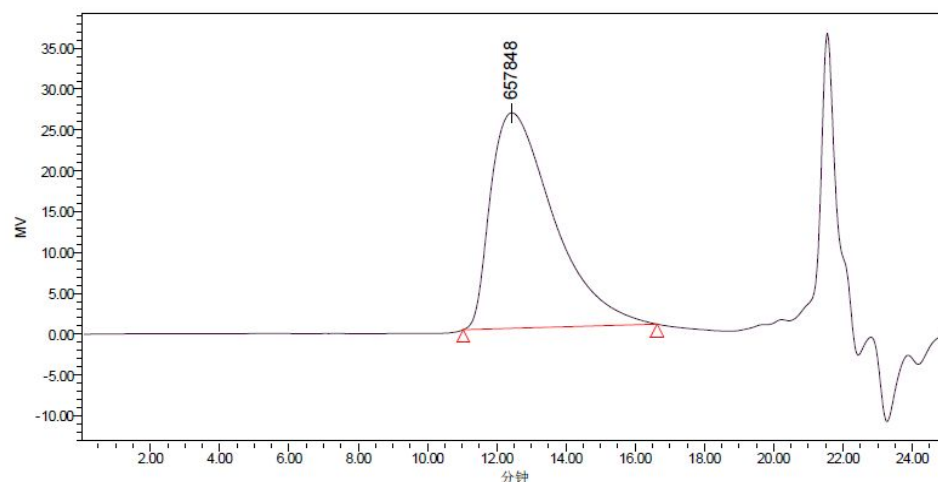

**GPC Results**

|   | Dist Name | Elution Volume (ml) | Retention Time (min) | Adjusted RT (min) | Mn     | Mw     | MP     | Mz      | Mz+1    | Mz/Mw    |
|---|-----------|---------------------|----------------------|-------------------|--------|--------|--------|---------|---------|----------|
| 1 |           | 12.436              | 12.436               | 12.436            | 162105 | 659013 | 657848 | 1618757 | 2721924 | 2.456336 |

**Figure S84.** GPC curve of  $C_6H_3$ -1,3,5-( $Me_2Si$ )<sub>3</sub>-end-functionalized poly(L-IMCI-*co*-ITPPA) in Table 3, entry 13.

## COMPUTATIONAL METHODS

All calculations presented in this paper were performed using density functional theory (DFT) with the hybrid functional B3LYP<sup>5-7</sup> as implemented in Gaussian 09 package.<sup>8</sup> Geometry optimizations were carried out with the 6-31G(d, p) basis set. On the basis of the optimized geometries, more accurate energies were obtained by performing single-point calculations with a larger 6-311+G (2d, 2p) basis set. Using an empirical formula by Grimme et al,<sup>9-12</sup> dispersion effects were taken into account throughout geometry optimizations and single-point calculations. Solvation effects were also considered throughout geometry optimizations and single-point calculations, using a conductor-like polarizable continuum model (CPCM)<sup>13-16</sup> method with chlorobenzene as the solvent. Frequency calculations were performed at the same level of theory as in the optimizations to further confirm the nature of stationary points and to obtain zero-point energies (ZPE) and entropy effects. The energies reported in this paper are the free energies which have been corrected for dispersion, solvation, ZPE, and entropy effects.

### Density functional calculations

#### *Initiation*

We first considered which species is the one essentially initiating the polymerization. The adduct of  $\text{Ph}_3\text{C}^+$  and a substrate **a** (see  $\text{Ph}_3\text{C}-(\text{a})_1^+$  in Figure S85) was optimized, having an energy 1.6 kcal/mol higher than the reactant state of  $\text{Ph}_3\text{C}^+ + \text{a}$  (Figure S86). This indicates that  $\text{Ph}_3\text{C}^+$  is an effective species to initiate the polymerization, especially considering that no transition state exists during the addition between  $\text{Ph}_3\text{C}^+$  and **a** because the nature of this step is a simple one bond formation.

The species of  $\text{A}^+$  (Figure S87) was also taken into account as an initiating species. Its formation should be activated by  $\text{Ph}_3\text{C}^+$  via a hydride transfer transition state (see  $\text{TS}_\text{A}$  in Figure S85), which shows a barrier of 16.4 kcal/mol (Figure S87). Although such an activation is energetically accessible, the subsequent addition of the substrate **a** is unreachable with an accumulated barrier of 28.6 kcal/mol (see  $\text{TS1}'$  in Figure

S88 for structures and Figure S87 for energies). This means that  $A^+$  is unable to work as a species to initiate the polymerization, at least in the first polymer chain.

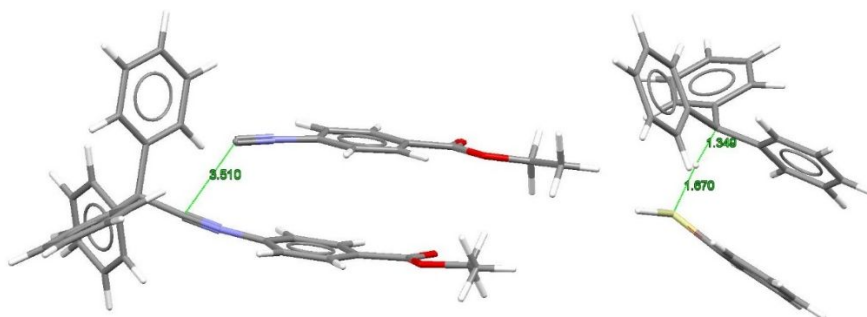

**a TS<sub>A</sub>**

**Figure S85.** Optimized structures of the adduct between  $\text{Ph}_3\text{C}^+$  and a substrate **a** ( $\text{Ph}_3\text{C}-(\text{a})_1^+$ ) and the transition state ( $\text{TS}_A$ ) for the  $A^+$  formation activated by  $\text{Ph}_3\text{C}^+$ .

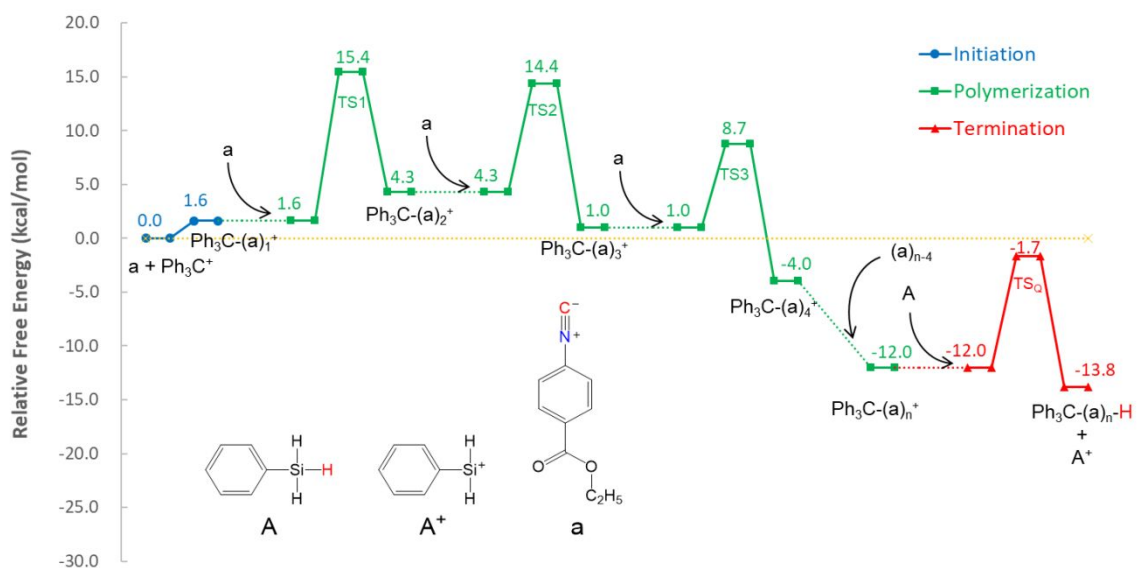

**Figure S86.** Free energy profile for the polymerization initiated by  $\text{Ph}_3\text{C}^+$ .

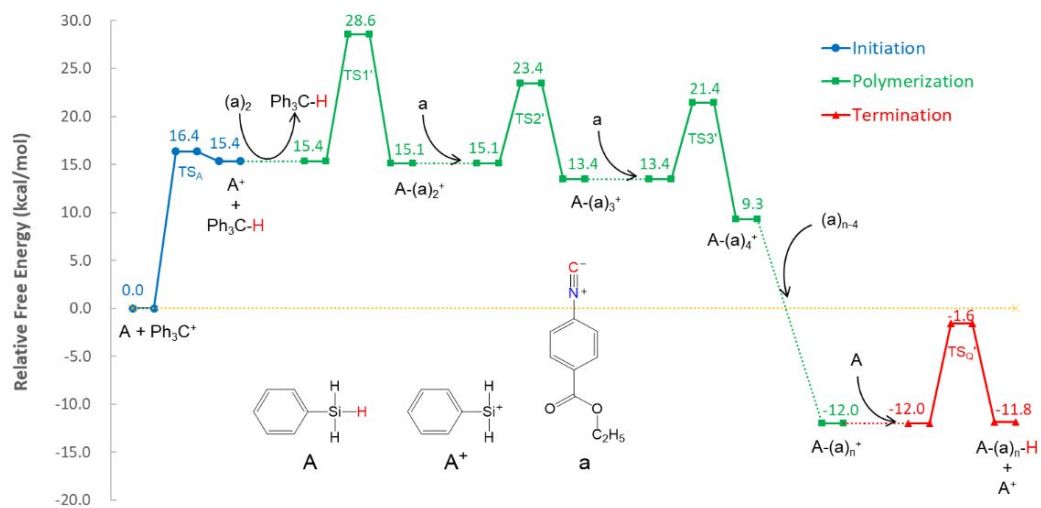

**Figure S87.** Free energy profile for the polymerization initiated by A<sup>+</sup>.

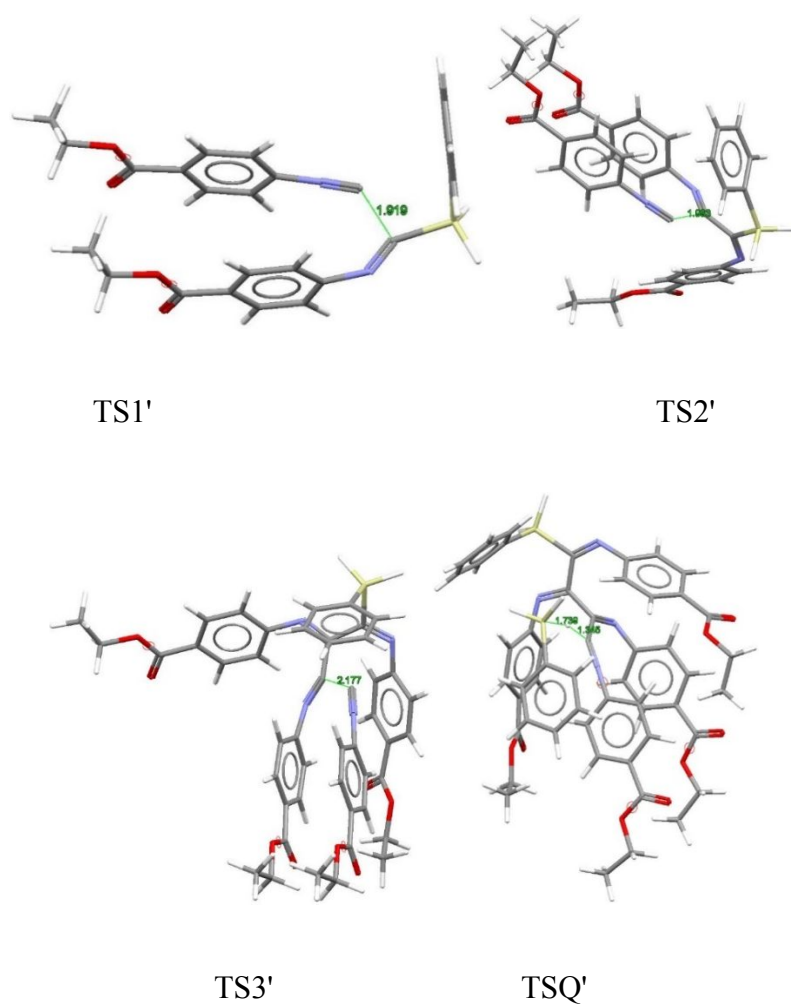



**Figure S88.** Optimized structures of stationary points in the polymerization initiated by  $A^+$ .

*Polymerization and termination*

Once the adduct of  $\text{Ph}_3\text{C}-(a)_1^+$  is formed, it is able to accept the addition of the second substrate **a** via a C-C bond formation transition state (see **TS1** in Figure S89 for structures and Figure S86 for energies). The barrier for this step is quite feasible, with a value of 15.4 kcal/mol accumulated from the initial state of  $\text{Ph}_3\text{C}^+ + \mathbf{a}$  (Figure S86). The subsequent additions of the third and fourth substrates (via **TS2** and **TS3** in Figure S89, respectively) are both energetically reachable with a little exothermicity (see Figure S86 for energies). It is expected that the following polymerization steps should have the same nature with reasonable barrier and exothermicity, making the overall polymerization reaction energetically feasible. With an adequate number (estimated as  $n$  in Figure S86) of substrates polymerized, the accumulated exothermicity should be sufficient for the final chain termination through a hydride transfer transition state from an **A** to the cyano carbon of the late substrate in the chain (see **TS<sub>Q</sub>** in Figure S89 for structures and Figure S86 for energies), which has a barrier of 10.3 kcal/mol. In summary,  $\text{Ph}_3\text{C}^+$  is an effective species to initiate the polymerization, which is able to be terminated by **A**.

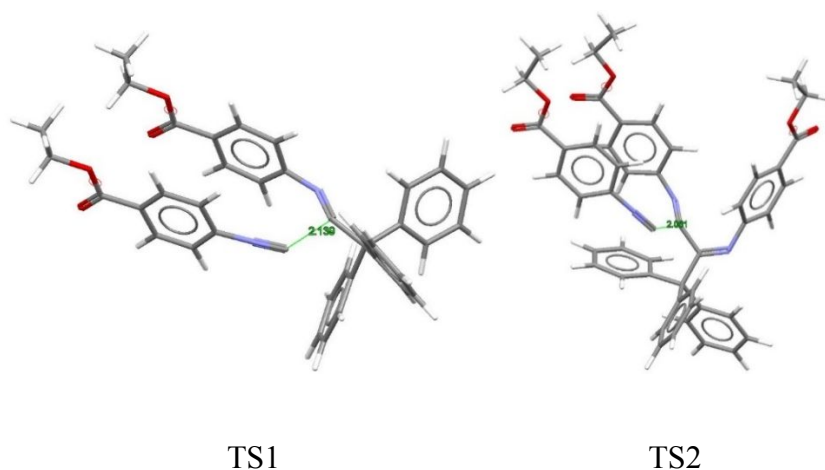

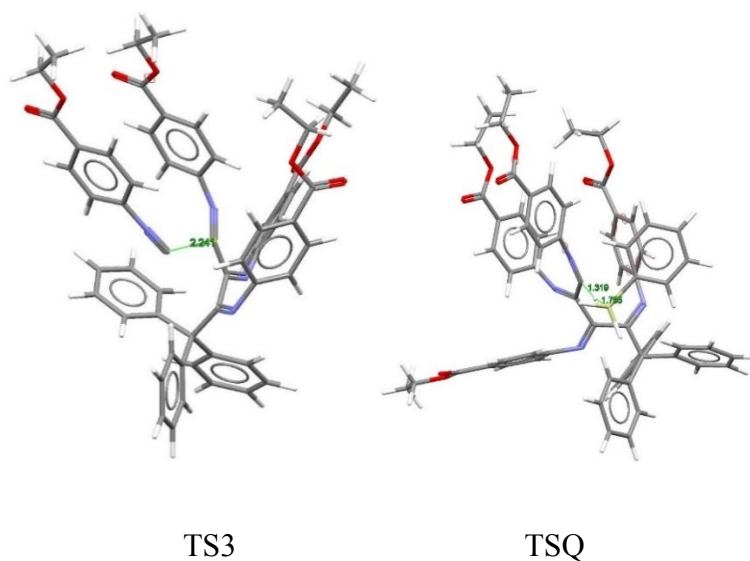

**Figure 89.** Optimized structures of stationary points in the polymerization initiated by  $\text{Ph}_3\text{C}^+$ .

Interestingly, the termination step in the  $\text{Ph}_3\text{C}^+$ -initiated polymerization is slightly exothermic by 1.8 kcal/mol (see red curve in Figure S86), making the  $\text{A}^+$  formation quite feasible, unlike the activation by  $\text{Ph}_3\text{C}^+$  described above (see the blue curve in Figure S87). The  $\text{A}^+$  obtained from the termination of the  $\text{Ph}_3\text{C}^+$ -initiated polymerization is able to initiate the addition of substrate via **TS1'** with a reasonable barrier of 13.2 kcal/mol. The following addition of more substrates are also shown to have feasible barriers and slight exothermicities (see **TS2'** and **TS3'** in Figure xx4 for structures and the green curve in Figure S87 for energies), making the polymerization sustainable. Such an  $\text{A}^+$ -initiated polymerization chain can also be terminated by a hydride transfer from an A to the cyano carbon of the late substrate in the chain (see **TSQ'** in Figure xx4 for structures and Figure S87 for energies), which has a barrier of 10.4 kcal/mol.

With these computational results, it can be concluded that the first polymerization chain should be initiated by  $\text{Ph}_3\text{C}^+$ , while the following chains can be initiated by  $\text{Ph}_3\text{C}^+$  or  $\text{A}^+$ . The  $\text{A}^+$  species is most likely formed in the termination steps of polymerization chains through a hydride transfer from A to the cyano carbon of the late substrate in the chain, instead in the activation by  $\text{Ph}_3\text{C}^+$ .

**a**

|                               |                                |
|-------------------------------|--------------------------------|
| 1 C1 3.9307 -0.0336 0.1056    | 27 C27 4.4156 -2.5741 -2.7254  |
| 2 C2 4.6797 0.1784 1.4417     | 28 H28 2.8827 -1.1810 -2.1450  |
| 3 C3 5.5291 1.2764 1.6016     | 29 C29 6.3946 -2.6116 -1.3405  |
| 4 C4 4.5618 -0.7639 2.4716    | 30 H30 6.3902 -1.2875 0.3557   |
| 5 C5 6.2534 1.4292 2.7853     | 31 C31 5.6872 -3.0826 -2.4466  |
| 6 H6 5.6288 2.0078 0.8084     | 32 H32 3.8614 -2.9291 -3.5884  |
| 7 C7 5.2781 -0.6016 3.6564    | 33 H33 7.3853 -2.9967 -1.1214  |
| 8 H8 3.9230 -1.6345 2.3505    | 34 H34 6.1243 -3.8388 -3.0909  |
| 9 C9 6.1266 0.4964 3.8156     | 35 C35 0.1666 -1.1386 0.8732   |
| 10 H10 6.9143 2.2824 2.8996   | 36 C36 -0.4801 -2.0151 -0.0060 |
| 11 H11 5.1751 -1.3340 4.4505  | 37 C37 -1.8533 -2.1767 0.1235  |
| 12 H12 6.6858 0.6228 4.7371   | 38 C38 -2.5550 -1.4765 1.1153  |
| 13 C13 3.6910 1.2990 -0.6536  | 39 C39 -1.8755 -0.6438 2.0126  |
| 14 C14 4.3919 1.5935 -1.8243  | 40 C40 -0.5034 -0.4649 1.9012  |
| 15 C15 2.7899 2.2357 -0.1288  | 41 H41 0.0787 -2.5168 -0.7865  |
| 16 C16 4.1828 2.8143 -2.4705  | 42 H42 -2.3889 -2.8202 -0.5624 |
| 17 H17 5.0965 0.8798 -2.2332  | 43 H43 -2.4411 -0.1146 2.7700  |
| 18 C18 2.5739 3.4460 -0.7836  | 44 H44 0.0372 0.2024 2.5617    |
| 19 H19 2.2603 2.0295 0.7972   | 45 N45 1.5066 -0.8582 0.6657   |
| 20 C20 3.2695 3.7369 -1.9600  | 46 C46 2.5873 -0.5242 0.4396   |
| 21 H21 4.7342 3.0373 -3.3783  | 47 C47 -4.0483 -1.5280 1.2121  |
| 22 H22 1.8675 4.1603 -0.3730  | 48 O48 -4.6882 -0.9152 2.0482  |
| 23 H23 3.1024 4.6790 -2.4722  | 49 O49 -4.5908 -2.2878 0.2542  |
| 24 C24 4.5640 -1.1361 -0.7826 | 50 C50 -6.0457 -2.3412 0.2196  |
| 25 C25 3.8552 -1.6008 -1.9008 | 51 H51 -6.3959 -2.8070 1.1452  |
| 26 C26 5.8345 -1.6436 -0.5031 | 52 H52 -6.4166 -1.3153 0.1859  |
|                               | 53 C53 -6.4339 -3.1326 -1.0110 |

54 H54 -7.5239 -3.1979 -1.0740  
 55 H55 -6.0644 -2.6448 -1.9175  
 56 H56 -6.0290 -4.1475 -0.9690  
 57 C57 -1.5289 0.9736 -1.4904  
 58 C58 -2.6767 0.3569 -2.0058  
 59 C59 -3.9097 0.6228 -1.4212  
 60 C60 -3.9969 1.4940 -0.3263  
 61 C61 -2.8435 2.1217 0.1620  
 62 C62 -1.6063 1.8699 -0.4166  
 63 H63 -2.5884 -0.3323 -2.8373  
 64 H64 -4.8029 0.1423 -1.8001  
 65 H65 -2.9309 2.7921 1.0090  
 66 H66 -0.7022 2.3348 -0.0408  
 67 N67 -0.2883 0.6590 -2.0209  
 68 C68 0.7730 0.3564 -2.4328  
 69 C69 -5.2869 1.7644 0.3770  
 70 O70 -5.3857 2.4796 1.3570  
 71 O71 -6.3258 1.1298 -0.1942  
 72 C72 -7.6187 1.3074 0.4472  
 73 H73 -7.5745 0.8370 1.4344  
 74 H74 -7.7952 2.3770 0.5875  
 75 C75 -8.6591 0.6699 -0.4506  
 76 H76 -9.6501 0.7914 -0.0042  
 77 H77 -8.6629 1.1443 -1.4358  
 78 H78 -8.4718 -0.3996 -0.5810

**TSA**

1 Si1 0.6752 0.0534 -2.3839  
 2 H2 0.1528 -1.1786 -2.9890  
 3 H3 0.2982 1.3137 -3.0363  
 4 C39 2.3404 -0.0071 -1.6463  
 5 C40 2.8190 -1.2009 -1.0621  
 6 C41 3.1109 1.1717 -1.5302  
 7 C42 4.0302 -1.2120 -0.3771  
 8 H43 2.2447 -2.1198 -1.1408  
 9 C44 4.3298 1.1505 -0.8578  
 10 H45 2.7527 2.1027 -1.9610  
 11 C46 4.7826 -0.0370 -0.2734  
 12 H47 4.3880 -2.1300 0.0776  
 13 H48 4.9211 2.0570 -0.7777  
 14 H49 5.7260 -0.0473 0.2640  
 15 H4 -0.2797 0.0829 -1.0137  
 16 C5 -0.9437 0.0228 0.1592  
 17 C6 -1.6886 1.3299 0.1134  
 18 C7 -1.7460 2.1682 1.2375  
 19 C8 -2.4091 1.6859 -1.0404  
 20 C9 -2.5044 3.3401 1.2021  
 21 H10 -1.2185 1.8964 2.1442  
 22 C11 -3.1512 2.8613 -1.0786  
 23 H12 -2.3881 1.0339 -1.9096  
 24 C13 -3.2003 3.6935 0.0461  
 25 H14 -2.5477 3.9747 2.0814  
 26 H15 -3.6918 3.1291 -1.9808  
 27 H16 -3.7805 4.6105 0.0182

28 C17 0.1941 -0.0718 1.1253  
 29 C18 0.3604 -1.1789 1.9770  
 30 C19 1.1355 0.9764 1.1865  
 31 C20 1.4383 -1.2331 2.8593  
 32 H21 -0.3637 -1.9838 1.9691  
 33 C22 2.2157 0.9132 2.0577  
 34 H23 1.0205 1.8365 0.5360  
 35 C24 2.3728 -0.1964 2.8948  
 36 H25 1.5461 -2.0878 3.5193  
 37 H26 2.9403 1.7199 2.0757  
 38 H27 3.2180 -0.2488 3.5740  
 39 C28 -1.7809 -1.2088 -0.0506  
 40 C29 -1.1784 -2.4229 -0.4291  
 41 C30 -3.1686 -1.1788 0.1617  
 42 C31 -1.9404 -3.5738 -0.5972  
 43 H32 -0.1055 -2.4640 -0.5883  
 44 C33 -3.9297 -2.3386 0.0074  
 45 H34 -3.6498 -0.2571 0.4658  
 46 C35 -3.3222 -3.5340 -0.3778  
 47 H36 -1.4603 -4.4993 -0.8983  
 48 H37 -4.9996 -2.3028 0.1862  
 49 H38 -3.9188 -4.4315 -0.5079

# **TS1'**

1 Si1 -2.3979 0.8078 1.5743  
 2 H2 -1.3459 0.1622 2.3728  
 3 H3 -2.3584 2.2775 1.5948

4 C4 -4.0895 0.1085 1.8129  
 5 C5 -4.2576 -1.2399 2.1849  
 6 C6 -5.2317 0.8968 1.5682  
 7 C7 -5.5356 -1.7845 2.3085  
 8 H8 -3.3911 -1.8661 2.3827  
 9 C9 -6.5087 0.3486 1.6927  
 10 H10 -5.1257 1.9405 1.2849  
 11 C11 -6.6599 -0.9909 2.0608  
 12 H12 -5.6556 -2.8235 2.5995  
 13 H13 -7.3827 0.9649 1.5061  
 14 H14 -7.6542 -1.4161 2.1592  
 15 C15 -0.9688 -0.5153 -2.2838  
 16 C16 -1.7085 -1.5772 -2.8223  
 17 C17 -1.6470 -1.8080 -4.1920  
 18 C18 -0.8464 -0.9974 -5.0075  
 19 C19 -0.0594 0.0136 -4.4376  
 20 C20 -0.1066 0.2594 -3.0714  
 21 H21 -2.3481 -2.1730 -2.1813  
 22 H22 -2.2452 -2.5943 -4.6347  
 23 H23 0.5625 0.6205 -5.0856  
 24 H24 0.4702 1.0591 -2.6215  
 25 N25 -1.1566 -0.1791 -0.9406  
 26 C26 -1.9471 0.4025 -0.2382  
 27 C27 -0.8329 -1.1391 -6.4957  
 28 O28 -0.1297 -0.4710 -7.2322  
 29 O29 -1.7041 -2.0646 -6.9228  
 30 C30 -1.7783 -2.2762 -8.3601

31 H31 -2.0242 -1.3232 -8.8362  
 32 H32 -0.7940 -2.5940 -8.7161  
 33 C33 -2.8447 -3.3288 -8.5878  
 34 H34 -2.9629 -3.5095 -9.6602  
 35 H35 -2.5713 -4.2719 -8.1067  
 36 H36 -3.8035 -2.9947 -8.1826  
 37 C37 -3.8849 0.7728 -3.7974  
 38 C38 -4.8131 -0.2043 -4.1853  
 39 C39 -4.9958 -0.4490 -5.5403  
 40 C40 -4.2589 0.2717 -6.4920  
 41 C41 -3.3485 1.2554 -6.0849  
 42 C42 -3.1544 1.5165 -4.7345  
 43 H43 -5.3563 -0.7645 -3.4333  
 44 H44 -5.6998 -1.2053 -5.8642  
 45 H45 -2.7853 1.7952 -6.8371  
 46 H46 -2.4392 2.2582 -4.4004  
 47 N47 -3.6273 0.9586 -2.4509  
 48 C48 -3.3782 1.0922 -1.3154  
 49 C49 -4.4002 0.0234 -7.9601  
 50 O50 -3.7299 0.5917 -8.8049  
 51 O51 -5.3331 -0.8973 -8.2389  
 52 C52 -5.5572 -1.1828 -9.6488  
 53 H53 -5.8940 -0.2624 -10.1346  
 54 H54 -4.6047 -1.4747 -10.0994  
 55 C55 -6.5903 -2.2874 -9.7216  
 56 H56 -6.7982 -2.5238 -10.7691  
 57 H57 -6.2269 -3.1938 -9.2289

58 H58 -7.5245 -1.9795 -9.2439

## TS2'

1 Si1 -3.2060 1.0241 0.9868  
 2 H2 -2.8206 -0.2951 1.5187  
 3 H3 -2.7691 2.1247 1.8631  
 4 C4 -5.0185 1.0676 0.5659  
 5 C5 -5.7922 -0.1076 0.6086  
 6 C6 -5.6296 2.2571 0.1211  
 7 C7 -7.1330 -0.0969 0.2162  
 8 H8 -5.3468 -1.0397 0.9464  
 9 C9 -6.9675 2.2678 -0.2777  
 10 H10 -5.0610 3.1834 0.0807  
 11 C11 -7.7192 1.0889 -0.2342  
 12 H12 -7.7176 -1.0110 0.2622  
 13 H13 -7.4245 3.1929 -0.6163  
 14 H14 -8.7603 1.0976 -0.5429  
 15 C15 -0.1901 1.6054 -1.8029  
 16 C16 -0.2962 0.6582 -2.8401  
 17 C17 0.4932 0.7870 -3.9775  
 18 C18 1.3890 1.8594 -4.0933  
 19 C19 1.5145 2.7815 -3.0431  
 20 C20 0.7514 2.6448 -1.8917  
 21 H21 -0.9614 -0.1930 -2.7353  
 22 H22 0.4215 0.0567 -4.7746  
 23 H23 2.2239 3.5950 -3.1442  
 24 H24 0.8456 3.3457 -1.0695

|                               |                                 |
|-------------------------------|---------------------------------|
| 25 N25 -0.9696 1.5294 -0.6385 | 52 C52 -8.7615 0.9689 -8.2492   |
| 26 C26 -2.2266 1.2864 -0.6427 | 53 H53 -8.5677 1.6868 -9.0513   |
| 27 C27 2.2422 2.0547 -5.3035  | 54 H54 -8.5163 -0.0312 -8.6164  |
| 28 O28 3.0422 2.9657 -5.4288  | 55 C55 -10.1785 1.0598 -7.7194  |
| 29 O29 2.0240 1.1175 -6.2400  | 56 H56 -10.8868 0.8044 -8.5128  |
| 30 C30 2.8084 1.2293 -7.4573  | 57 H57 -10.3205 0.3649 -6.8876  |
| 31 H31 2.6095 2.2049 -7.9110  | 58 H58 -10.4007 2.0720 -7.3703  |
| 32 H32 3.8694 1.1916 -7.1924  | 59 C59 -5.5950 -1.2601 -3.7978  |
| 33 C33 2.3998 0.0819 -8.3587  | 60 C60 -6.9461 -1.1884 -3.4283  |
| 34 H34 2.9683 0.1276 -9.2920  | 61 C61 -7.9131 -1.4945 -4.3770  |
| 35 H35 2.6003 -0.8801 -7.8784 | 62 C62 -7.5335 -1.8614 -5.6771  |
| 36 H36 1.3344 0.1373 -8.5998  | 63 C63 -6.1783 -1.9356 -6.0241  |
| 37 C37 -4.1721 1.9485 -3.9338 | 64 C64 -5.1963 -1.6371 -5.0875  |
| 38 C38 -5.5602 2.0943 -3.8147 | 65 H65 -7.2136 -0.8761 -2.4257  |
| 39 C39 -6.3473 1.8932 -4.9427 | 66 H66 -8.9630 -1.4398 -4.1176  |
| 40 C40 -5.7514 1.5680 -6.1688 | 67 H67 -5.9089 -2.2126 -7.0365  |
| 41 C41 -4.3545 1.4963 -6.2782 | 68 H68 -4.1442 -1.6718 -5.3426  |
| 42 C42 -3.5498 1.6933 -5.1644 | 69 N69 -4.6324 -0.8840 -2.8785  |
| 43 H43 -6.0031 2.3019 -2.8474 | 70 C70 -3.8435 -0.5443 -2.0819  |
| 44 H44 -7.4255 1.9543 -4.8664 | 71 C71 -8.5387 -2.1826 -6.7369  |
| 45 H45 -3.9162 1.2541 -7.2395 | 72 O72 -8.2395 -2.4527 -7.8874  |
| 46 H46 -2.4705 1.6073 -5.2199 | 73 O73 -9.7987 -2.1322 -6.2831  |
| 47 N47 -3.3934 1.9746 -2.7795 | 74 C74 -10.8440 -2.4735 -7.2372 |
| 48 C48 -3.0046 1.2546 -1.9023 | 75 H75 -10.7382 -1.8302 -8.1146 |
| 49 C49 -6.5634 1.2421 -7.3817 | 76 H76 -10.6907 -3.5088 -7.5556 |
| 50 O50 -6.0783 0.9577 -8.4620 | 77 C77 -12.1707 -2.2749 -6.5347 |
| 51 O51 -7.8799 1.2744 -7.1327 | 78 H78 -12.9864 -2.5360 -7.2150 |

79 H79 -12.2415 -2.9114 -5.6484  
80 H80 -12.2975 -1.2325 -6.2284

**TS3'**

1 Si1 -6.2580 0.6503 -1.8228  
2 H2 -7.2254 1.7631 -1.7523  
3 H3 -6.3540 -0.0442 -3.1187  
4 C4 -6.5257 -0.5169 -0.3852  
5 C5 -6.9098 -0.0097 0.8707  
6 C6 -6.3245 -1.9048 -0.5102  
7 C7 -7.0929 -0.8608 1.9651  
8 H8 -7.0765 1.0575 0.9989  
9 C9 -6.5123 -2.7583 0.5792  
10 H10 -6.0147 -2.3209 -1.4646  
11 C11 -6.8979 -2.2369 1.8192  
12 H12 -7.3967 -0.4519 2.9243  
13 H13 -6.3626 -3.8276 0.4613  
14 H14 -7.0488 -2.9008 2.6654  
15 C15 -3.3868 3.3704 -0.7219  
16 C16 -2.8505 3.0122 0.5288  
17 C17 -1.7142 3.6525 1.0190  
18 C18 -1.1076 4.6666 0.2712  
19 C19 -1.7067 5.0870 -0.9308  
20 C20 -2.8436 4.4617 -1.4214  
21 H21 -3.3470 2.2500 1.1147  
22 H22 -1.2822 3.3421 1.9636  
23 H23 -1.2379 5.8886 -1.4914

24 H24 -3.2891 4.7706 -2.3605  
25 N25 -4.5167 2.7062 -1.2128  
26 C26 -4.5493 1.4760 -1.5746  
27 C27 0.2161 5.2438 0.6328  
28 O28 0.8667 5.9465 -0.1241  
29 O29 0.6261 4.8696 1.8595  
30 C30 1.9228 5.3525 2.3115  
31 H31 2.1605 6.2752 1.7801  
32 H32 1.7802 5.5710 3.3719  
33 C33 2.9897 4.2913 2.1008  
34 H34 3.9497 4.6573 2.4783  
35 H35 2.7351 3.3811 2.6511  
36 H36 3.1142 4.0487 1.0416  
37 C37 -2.7044 -1.6709 -2.1013  
38 C38 -2.6229 -2.6358 -1.0846  
39 C39 -1.5360 -3.5030 -1.0469  
40 C40 -0.5717 -3.4698 -2.0633  
41 C41 -0.7517 -2.6144 -3.1587  
42 C42 -1.8021 -1.7026 -3.1759  
43 H43 -3.3897 -2.6664 -0.3201  
44 H44 -1.4233 -4.1999 -0.2253  
45 H45 -0.0248 -2.6323 -3.9639  
46 H46 -1.9025 -0.9861 -3.9833  
47 N47 -3.7025 -0.6735 -1.9993  
48 C48 -3.3839 0.5348 -1.7004  
49 C49 0.6838 -4.2680 -1.9895  
50 O50 1.4237 -4.4802 -2.9324



|                               |                                  |
|-------------------------------|----------------------------------|
| 51 O51 0.9389 -4.6726 -0.7284 | 78 H78 8.0473 -0.4479 -1.1415    |
| 52 C52 2.1768 -5.4032 -0.5199 | 79 H79 6.4283 -1.1689 -1.0215    |
| 53 H53 2.1186 -6.3514 -1.0627 | 80 H80 7.0277 -0.5866 -2.5870    |
| 54 H54 3.0000 -4.8216 -0.9457 | 81 C81 1.0319 -0.0998 0.6144     |
| 55 C55 2.3291 -5.6067 0.9744  | 82 C82 1.5480 -1.3927 0.4228     |
| 56 H56 3.2512 -6.1580 1.1793  | 83 C83 2.8822 -1.6283 0.7254     |
| 57 H57 2.3795 -4.6466 1.4960  | 84 C84 3.6882 -0.6014 1.2350     |
| 58 H58 1.4880 -6.1782 1.3775  | 85 C85 3.1431 0.6726 1.4517      |
| 59 C59 0.1769 1.6016 -2.2739  | 86 C86 1.8184 0.9386 1.1420      |
| 60 C60 1.0440 0.5259 -2.5202  | 87 H87 0.9156 -2.1794 0.0318     |
| 61 C61 2.4104 0.6860 -2.3188  | 88 H88 3.3036 -2.6126 0.5637     |
| 62 C62 2.9239 1.9128 -1.8772  | 89 H89 3.7843 1.4547 1.8406      |
| 63 C63 2.0610 3.0070 -1.7326  | 90 H90 1.3937 1.9268 1.2698      |
| 64 C64 0.6975 2.8627 -1.9539  | 91 N91 -0.2443 0.1654 0.2143     |
| 65 H65 0.6406 -0.4382 -2.7997 | 92 C92 -1.3566 0.3599 -0.1715    |
| 66 H66 3.0736 -0.1609 -2.4465 | 93 C93 5.1231 -0.8156 1.5750     |
| 67 H67 2.4566 3.9651 -1.4142  | 94 O94 5.8469 0.0475 2.0437      |
| 68 H68 0.0292 3.7007 -1.8347  | 95 O95 5.5332 -2.0645 1.3003     |
| 69 N69 -1.2227 1.4244 -2.3757 | 96 C96 6.9090 -2.3863 1.6408     |
| 70 C70 -1.9319 0.8866 -1.4711 | 97 H97 7.5677 -1.6577 1.1607     |
| 71 C71 4.3403 2.0686 -1.4484  | 98 H98 7.0277 -2.2877 2.7242     |
| 72 O72 4.7829 3.0708 -0.9100  | 99 C99 7.1644 -3.7988 1.1572     |
| 73 O73 5.0678 0.9631 -1.6762  | 100 H100 8.1859 -4.0959 1.4115   |
| 74 C74 6.4441 0.9807 -1.2136  | 101 H101 6.4714 -4.5022 1.6277   |
| 75 H75 6.9795 1.7792 -1.7359  | 102 H102 7.0453 -3.8644 0.0718   |
| 76 H76 6.4487 1.2041 -0.1435  | 103 Si103 -3.1758 -0.6000 2.0462 |
| 77 C77 7.0194 -0.3900 -1.5113 | 104 H104 -3.6572 0.6420 2.6635   |

105 H105 -4.1861 -1.5119 1.5110  
 106 C107 -1.6640 -1.3229 2.7683  
 107 C108 -0.7481 -0.4966 3.4570  
 108 C109 -1.3106 -2.6651 2.5040  
 109 C110 0.4867 -0.9979 3.8624  
 110 H111 -0.9955 0.5422 3.6602  
 111 C112 -0.0766 -3.1617 2.9117  
 112 H113 -2.0031 -3.3184 1.9818  
 113 C114 0.8254 -2.3247 3.5798  
 114 H115 1.1908 -0.3542 4.3790  
 115 H116 0.1911 -4.1913 2.6989  
 116 H117 1.7963 -2.7080 3.8780  
 117 H106 -2.3823 0.0430 0.6384

# **TSQ'**

1 Si1 -6.2580 0.6503 -1.8228  
 2 H2 -7.2254 1.7631 -1.7523  
 3 H3 -6.3540 -0.0442 -3.1187  
 4 C4 -6.5257 -0.5169 -0.3852  
 5 C5 -6.9098 -0.0097 0.8707  
 6 C6 -6.3245 -1.9048 -0.5102  
 7 C7 -7.0929 -0.8608 1.9651  
 8 H8 -7.0765 1.0575 0.9989  
 9 C9 -6.5123 -2.7583 0.5792  
 10 H10 -6.0147 -2.3209 -1.4646  
 11 C11 -6.8979 -2.2369 1.8192  
 12 H12 -7.3967 -0.4519 2.9243

13 H13 -6.3626 -3.8276 0.4613  
 14 H14 -7.0488 -2.9008 2.6654  
 15 C15 -3.3868 3.3704 -0.7219  
 16 C16 -2.8505 3.0122 0.5288  
 17 C17 -1.7142 3.6525 1.0190  
 18 C18 -1.1076 4.6666 0.2712  
 19 C19 -1.7067 5.0870 -0.9308  
 20 C20 -2.8436 4.4617 -1.4214  
 21 H21 -3.3470 2.2500 1.1147  
 22 H22 -1.2822 3.3421 1.9636  
 23 H23 -1.2379 5.8886 -1.4914  
 24 H24 -3.2891 4.7706 -2.3605  
 25 N25 -4.5167 2.7062 -1.2128  
 26 C26 -4.5493 1.4760 -1.5746  
 27 C27 0.2161 5.2438 0.6328  
 28 O28 0.8667 5.9465 -0.1241  
 29 O29 0.6261 4.8696 1.8595  
 30 C30 1.9228 5.3525 2.3115  
 31 H31 2.1605 6.2752 1.7801  
 32 H32 1.7802 5.5710 3.3719  
 33 C33 2.9897 4.2913 2.1008  
 34 H34 3.9497 4.6573 2.4783  
 35 H35 2.7351 3.3811 2.6511  
 36 H36 3.1142 4.0487 1.0416  
 37 C37 -2.7044 -1.6709 -2.1013  
 38 C38 -2.6229 -2.6358 -1.0846  
 39 C39 -1.5360 -3.5030 -1.0469

|                                |                               |
|--------------------------------|-------------------------------|
| 40 C40 -0.5717 -3.4698 -2.0633 | 67 H67 2.4566 3.9651 -1.4142  |
| 41 C41 -0.7517 -2.6144 -3.1587 | 68 H68 0.0292 3.7007 -1.8347  |
| 42 C42 -1.8021 -1.7026 -3.1759 | 69 N69 -1.2227 1.4244 -2.3757 |
| 43 H43 -3.3897 -2.6664 -0.3201 | 70 C70 -1.9319 0.8866 -1.4711 |
| 44 H44 -1.4233 -4.1999 -0.2253 | 71 C71 4.3403 2.0686 -1.4484  |
| 45 H45 -0.0248 -2.6323 -3.9639 | 72 O72 4.7829 3.0708 -0.9100  |
| 46 H46 -1.9025 -0.9861 -3.9833 | 73 O73 5.0678 0.9631 -1.6762  |
| 47 N47 -3.7025 -0.6735 -1.9993 | 74 C74 6.4441 0.9807 -1.2136  |
| 48 C48 -3.3839 0.5348 -1.7004  | 75 H75 6.9795 1.7792 -1.7359  |
| 49 C49 0.6838 -4.2680 -1.9895  | 76 H76 6.4487 1.2041 -0.1435  |
| 50 O50 1.4237 -4.4802 -2.9324  | 77 C77 7.0194 -0.3900 -1.5113 |
| 51 O51 0.9389 -4.6726 -0.7284  | 78 H78 8.0473 -0.4479 -1.1415 |
| 52 C52 2.1768 -5.4032 -0.5199  | 79 H79 6.4283 -1.1689 -1.0215 |
| 53 H53 2.1186 -6.3514 -1.0627  | 80 H80 7.0277 -0.5866 -2.5870 |
| 54 H54 3.0000 -4.8216 -0.9457  | 81 C81 1.0319 -0.0998 0.6144  |
| 55 C55 2.3291 -5.6067 0.9744   | 82 C82 1.5480 -1.3927 0.4228  |
| 56 H56 3.2512 -6.1580 1.1793   | 83 C83 2.8822 -1.6283 0.7254  |
| 57 H57 2.3795 -4.6466 1.4960   | 84 C84 3.6882 -0.6014 1.2350  |
| 58 H58 1.4880 -6.1782 1.3775   | 85 C85 3.1431 0.6726 1.4517   |
| 59 C59 0.1769 1.6016 -2.2739   | 86 C86 1.8184 0.9386 1.1420   |
| 60 C60 1.0440 0.5259 -2.5202   | 87 H87 0.9156 -2.1794 0.0318  |
| 61 C61 2.4104 0.6860 -2.3188   | 88 H88 3.3036 -2.6126 0.5637  |
| 62 C62 2.9239 1.9128 -1.8772   | 89 H89 3.7843 1.4547 1.8406   |
| 63 C63 2.0610 3.0070 -1.7326   | 90 H90 1.3937 1.9268 1.2698   |
| 64 C64 0.6975 2.8627 -1.9539   | 91 N91 -0.2443 0.1654 0.2143  |
| 65 H65 0.6406 -0.4382 -2.7997  | 92 C92 -1.3566 0.3599 -0.1715 |
| 66 H66 3.0736 -0.1609 -2.4465  | 93 C93 5.1231 -0.8156 1.5750  |

94 O94 5.8469 0.0475 2.0437  
 95 O95 5.5332 -2.0645 1.3003  
 96 C96 6.9090 -2.3863 1.6408  
 97 H97 7.5677 -1.6577 1.1607  
 98 H98 7.0277 -2.2877 2.7242  
 99 C99 7.1644 -3.7988 1.1572  
 100 H100 8.1859 -4.0959 1.4115  
 101 H101 6.4714 -4.5022 1.6277  
 102 H102 7.0453 -3.8644 0.0718  
 103 Si103 -3.1758 -0.6000 2.0462  
 104 H104 -3.6572 0.6420 2.6635  
 105 H105 -4.1861 -1.5119 1.5110  
 106 C107 -1.6640 -1.3229 2.7683  
 107 C108 -0.7481 -0.4966 3.4570  
 108 C109 -1.3106 -2.6651 2.5040  
 109 C110 0.4867 -0.9979 3.8624  
 110 H111 -0.9955 0.5422 3.6602  
 111 C112 -0.0766 -3.1617 2.9117  
 112 H113 -2.0031 -3.3184 1.9818  
 113 C114 0.8254 -2.3247 3.5798  
 114 H115 1.1908 -0.3542 4.3790  
 115 H116 0.1911 -4.1913 2.6989  
 116 H117 1.7963 -2.7080 3.8780  
 117 H106 -2.3823 0.0430 0.6384

# **TS1**

1 C1 3.7941 -0.0178 0.0729

2 C2 4.6931 1.1121 -0.5044  
 3 C3 5.8245 0.7910 -1.2626  
 4 C4 4.4597 2.4478 -0.1548  
 5 C5 6.6980 1.7972 -1.6801  
 6 H6 6.0299 -0.2384 -1.5304  
 7 C7 5.3287 3.4506 -0.5810  
 8 H8 3.6075 2.7149 0.4614  
 9 C9 6.4512 3.1290 -1.3475  
 10 H10 7.5707 1.5328 -2.2688  
 11 H11 5.1300 4.4821 -0.3078  
 12 H12 7.1286 3.9098 -1.6781  
 13 C13 3.7717 -1.3055 -0.7927  
 14 C14 3.8021 -2.5813 -0.2181  
 15 C15 3.5854 -1.1840 -2.1793  
 16 C16 3.6921 -3.7167 -1.0234  
 17 H17 3.9109 -2.6936 0.8530  
 18 C18 3.4707 -2.3188 -2.9792  
 19 H19 3.5376 -0.2001 -2.6346  
 20 C20 3.5287 -3.5903 -2.4029  
 21 H21 3.7284 -4.7000 -0.5654  
 22 H22 3.3350 -2.2084 -4.0503  
 23 H23 3.4416 -4.4751 -3.0254  
 24 C24 4.2132 -0.2131 1.5386  
 25 C25 3.4603 0.2957 2.6014  
 26 C26 5.4489 -0.8178 1.8053  
 27 C27 3.9224 0.1794 3.9142  
 28 H28 2.5100 0.7888 2.4211

29 C29 5.9065 -0.9374 3.1155  
30 H30 6.0540 -1.1915 0.9861  
31 C31 5.1432 -0.4413 4.1759  
32 H32 3.3242 0.5765 4.7281  
33 H33 6.8628 -1.4139 3.3067  
34 H34 5.5015 -0.5335 5.1963  
35 C35 0.2339 1.4107 -0.7715  
36 C36 -0.4815 2.2598 0.0809  
37 C37 -1.8599 2.3421 -0.0724  
38 C38 -2.5056 1.5955 -1.0690  
39 C39 -1.7597 0.8091 -1.9559  
40 C40 -0.3813 0.7134 -1.8195  
41 H41 0.0318 2.7972 0.8696  
42 H42 -2.4431 2.9569 0.6014  
43 H43 -2.2781 0.2453 -2.7220  
44 H44 0.2085 0.0750 -2.4668  
45 N45 1.5794 1.1670 -0.5157  
46 C46 2.3715 0.4244 -0.0385  
47 C47 -3.9955 1.5505 -1.1839  
48 O48 -4.5882 0.8543 -1.9897  
49 O49 -4.5984 2.3311 -0.2780  
50 C50 -6.0531 2.3271 -0.2873  
51 H51 -6.3927 2.7465 -1.2388  
52 H52 -6.3899 1.2909 -0.2275  
53 C53 -6.5081 3.1476 0.9010  
54 H54 -7.6010 3.1862 0.9228  
55 H55 -6.1587 2.7001 1.8359

56 H56 -6.1286 4.1712 0.8388  
57 C57 -1.3331 -1.4553 0.6325  
58 C58 -2.1944 -0.7407 1.4738  
59 C59 -3.5665 -0.8298 1.2626  
60 C60 -4.0677 -1.6193 0.2195  
61 C61 -3.1903 -2.3418 -0.6009  
62 C62 -1.8193 -2.2689 -0.4001  
63 H63 -1.7868 -0.1142 2.2578  
64 H64 -4.2479 -0.2728 1.8932  
65 H65 -3.5996 -2.9475 -1.4008  
66 H66 -1.1258 -2.8046 -1.0376  
67 N67 0.0364 -1.2962 0.7744  
68 C68 1.1935 -1.1256 0.8478  
69 C69 -5.5313 -1.7221 -0.0692  
70 O70 -5.9967 -2.4026 -0.9639  
71 O71 -6.2734 -0.9877 0.7773  
72 C72 -7.7159 -1.0689 0.6035  
73 H73 -7.9686 -0.6602 -0.3797  
74 H74 -8.0072 -2.1226 0.6157  
75 C75 -8.3473 -0.2845 1.7346  
76 H76 -9.4363 -0.3197 1.6404  
77 H77 -8.0693 -0.7094 2.7029  
78 H78 -8.0339 0.7626 1.7114

## **TS2**

1 C1 3.8815 -1.3763 0.0199  
2 C2 5.3567 -1.2667 -0.4491

|                               |                               |
|-------------------------------|-------------------------------|
| 3 C3 5.8964 -2.1072 -1.4297   | 30 H30 4.8940 -3.6873 0.9756  |
| 4 C4 6.2202 -0.3773 0.2136    | 31 C31 4.2025 -2.7125 4.1599  |
| 5 C5 7.2505 -2.0322 -1.7703   | 32 H32 3.3011 -0.8294 4.6950  |
| 6 H6 5.2745 -2.8369 -1.9323   | 33 H33 5.0985 -4.4804 3.3027  |
| 7 C7 7.5663 -0.2958 -0.1329   | 34 H34 4.3008 -3.0555 5.1850  |
| 8 H8 5.8400 0.2449 1.0138     | 35 C35 3.0498 2.3559 -0.0133  |
| 9 C9 8.0887 -1.1202 -1.1331   | 36 C36 1.9679 2.6131 0.8502   |
| 10 H10 7.6433 -2.6960 -2.5345 | 37 C37 1.3503 3.8582 0.8337   |
| 11 H11 8.2106 0.4053 0.3889   | 38 C38 1.7952 4.8521 -0.0490  |
| 12 H12 9.1394 -1.0602 -1.4001 | 39 C39 2.8889 4.5982 -0.8898  |
| 13 C13 3.0249 -2.3179 -0.8657 | 40 C40 3.5320 3.3686 -0.8583  |
| 14 C14 2.2447 -3.3590 -0.3454 | 41 H41 1.6332 1.8497 1.5451   |
| 15 C15 2.9293 -2.0388 -2.2421 | 42 H42 0.5230 4.0626 1.5026   |
| 16 C16 1.4038 -4.1051 -1.1758 | 43 H43 3.2286 5.3826 -1.5565  |
| 17 H17 2.2803 -3.5877 0.7121  | 44 H44 4.3856 3.1646 -1.4949  |
| 18 C18 2.0936 -2.7825 -3.0716 | 45 N45 3.7188 1.1264 -0.0166  |
| 19 H19 3.5105 -1.2241 -2.6635 | 46 C46 3.1613 -0.0122 -0.0944 |
| 20 C20 1.3249 -3.8226 -2.5394 | 47 C47 1.1498 6.1961 -0.1223  |
| 21 H21 0.8133 -4.9108 -0.7503 | 48 O48 1.5223 7.0884 -0.8639  |
| 22 H22 2.0402 -2.5480 -4.1299 | 49 O49 0.1077 6.3094 0.7179   |
| 23 H23 0.6722 -4.4044 -3.1825 | 50 C50 -0.5849 7.5864 0.7158  |
| 24 C24 3.9434 -1.8255 1.5008  | 51 H51 0.1327 8.3719 0.9707   |
| 25 C25 3.5142 -1.0269 2.5643  | 52 H52 -0.9518 7.7817 -0.2963 |
| 26 C26 4.5280 -3.0690 1.7891  | 53 C53 -1.7094 7.4859 1.7256  |
| 27 C27 3.6413 -1.4676 3.8854  | 54 H54 -2.2598 8.4304 1.7578  |
| 28 H28 3.0896 -0.0468 2.3832  | 55 H55 -2.4067 6.6886 1.4531  |
| 29 C29 4.6484 -3.5128 3.1032  | 56 H56 -1.3166 7.2804 2.7254  |

57 C57 -0.4624 0.3335 -1.4576  
58 C58 -1.2315 1.4146 -1.0056  
59 C59 -2.6137 1.3319 -1.1155  
60 C60 -3.2108 0.1968 -1.6849  
61 C61 -2.4153 -0.8325 -2.2049  
62 C62 -1.0325 -0.7723 -2.1025  
63 H63 -0.7491 2.2650 -0.5379  
64 H64 -3.2354 2.1303 -0.7302  
65 H65 -2.8972 -1.6951 -2.6491  
66 H66 -0.4005 -1.5805 -2.4515  
67 N67 0.8982 0.3125 -1.1769  
68 C68 1.7023 -0.0765 -0.3847  
69 C69 -4.6927 0.0030 -1.6997  
70 O70 -5.2372 -0.9923 -2.1455  
71 O71 -5.3452 1.0252 -1.1308  
72 C72 -6.7940 0.9100 -1.0636  
73 H73 -7.1891 0.9471 -2.0831  
74 H74 -7.0381 -0.0633 -0.6346  
75 C75 -7.2931 2.0553 -0.2086  
76 H76 -8.3847 2.0196 -0.1490  
77 H77 -6.8885 1.9850 0.8052  
78 H78 -7.0037 3.0194 -0.6358  
79 C79 -1.7683 -1.7120 1.0935  
80 C80 -2.7404 -0.8317 1.5838  
81 C81 -4.0822 -1.1688 1.4406  
82 C82 -4.4427 -2.3664 0.8095  
83 C83 -3.4535 -3.2437 0.3426

84 C84 -2.1103 -2.9268 0.4826  
85 H85 -2.4414 0.1022 2.0440  
86 H86 -4.8500 -0.4946 1.7987  
87 H87 -3.7563 -4.1637 -0.1431  
88 H88 -1.3306 -3.5759 0.1014  
89 N89 -0.4350 -1.3445 1.1432  
90 C90 0.6993 -1.0507 1.1298  
91 C91 -5.8715 -2.7525 0.5936  
92 O92 -6.2165 -3.7767 0.0349  
93 O93 -6.7267 -1.8455 1.0941  
94 C94 -8.1430 -2.1504 0.9581  
95 H95 -8.3893 -2.1710 -0.1080  
96 H96 -8.3235 -3.1484 1.3664  
97 C97 -8.9043 -1.0762 1.7064  
98 H98 -9.9782 -1.2678 1.6288  
99 H99 -8.6286 -1.0719 2.7644  
100 H100 -8.7005 -0.0859 1.2902

### **TS3**

1 C1 3.7991 -2.4783 -0.0211  
2 C2 5.1854 -1.8911 -0.3821  
3 C3 5.7748 -2.1038 -1.6335  
4 C4 5.9215 -1.2092 0.5975  
5 C5 7.0552 -1.6183 -1.9097  
6 H6 5.2400 -2.6551 -2.3981  
7 C7 7.1975 -0.7210 0.3231  
8 H8 5.4990 -1.0652 1.5863

|                               |                               |
|-------------------------------|-------------------------------|
| 9 C9 7.7682 -0.9178 -0.9365   | 36 C36 0.7557 -0.8670 3.1185  |
| 10 H10 7.4933 -1.7934 -2.8876 | 37 C37 -0.0613 0.1344 3.6300  |
| 11 H11 7.7454 -0.1884 1.0944  | 38 C38 0.4521 1.4207 3.8528   |
| 12 H12 8.7608 -0.5355 -1.1538 | 39 C39 1.8091 1.6751 3.6087   |
| 13 C13 2.9021 -2.6872 -1.2849 | 40 C40 2.6221 0.6911 3.0573   |
| 14 C14 2.1423 -3.8485 -1.4804 | 41 H41 0.3662 -1.8619 2.9376  |
| 15 C15 2.7706 -1.6623 -2.2437 | 42 H42 -1.1017 -0.0747 3.8498 |
| 16 C16 1.2462 -3.9586 -2.5477 | 43 H43 2.2041 2.6633 3.8175   |
| 17 H17 2.2338 -4.6814 -0.7972 | 44 H44 3.6580 0.9017 2.8152   |
| 18 C18 1.8660 -1.7624 -3.3004 | 45 N45 2.8298 -1.5705 2.0897  |
| 19 H19 3.4006 -0.7853 -2.1890 | 46 C46 3.0693 -1.4197 0.8469  |
| 20 C20 1.0841 -2.9092 -3.4509 | 47 C47 -0.4033 2.5454 4.3197  |
| 21 H21 0.6711 -4.8721 -2.6635 | 48 O48 0.0239 3.5943 4.7674   |
| 22 H22 1.7896 -0.9477 -4.0141 | 49 O49 -1.7163 2.2849 4.1498  |
| 23 H23 0.3824 -2.9934 -4.2752 | 50 C50 -2.6380 3.3168 4.5948  |
| 24 C24 3.9743 -3.7928 0.7751  | 51 H51 -2.5388 3.4212 5.6796  |
| 25 C25 2.8943 -4.3639 1.4731  | 52 H52 -2.3483 4.2664 4.1367  |
| 26 C26 5.1940 -4.4794 0.7784  | 53 C53 -4.0313 2.8847 4.1878  |
| 27 C27 3.0349 -5.5705 2.1545  | 54 H54 -4.7624 3.6112 4.5535  |
| 28 H28 1.9318 -3.8671 1.4742  | 55 H55 -4.1200 2.8318 3.0993  |
| 29 C29 5.3370 -5.6911 1.4607  | 56 H56 -4.2758 1.9056 4.6091  |
| 30 H30 6.0464 -4.0735 0.2483  | 57 C57 3.2144 2.0317 -0.6864  |
| 31 C31 4.2613 -6.2403 2.1552  | 58 C58 2.3949 2.9622 -0.0218  |
| 32 H32 2.1841 -5.9871 2.6854  | 59 C59 2.2384 4.2374 -0.5513  |
| 33 H33 6.2957 -6.2006 1.4456  | 60 C60 2.8744 4.5881 -1.7503  |
| 34 H34 4.3729 -7.1793 2.6889  | 61 C61 3.7060 3.6614 -2.3964  |
| 35 C35 2.0833 -0.5732 2.7627  | 62 C62 3.9044 2.3995 -1.8552  |



|                               |                                  |
|-------------------------------|----------------------------------|
| 63 H63 1.9220 2.6974 0.9167   | 90 C90 1.1726 0.0862 0.0410      |
| 64 H64 1.6192 4.9629 -0.0381  | 91 C91 -5.2590 0.9258 -1.1072    |
| 65 H65 4.2050 3.9554 -3.3126  | 92 O92 -5.7400 0.6353 -2.1882    |
| 66 H66 4.5704 1.6841 -2.3252  | 93 O93 -5.9715 1.1214 0.0088     |
| 67 N67 3.4652 0.7535 -0.1829  | 94 C94 -7.4148 0.9793 -0.1089    |
| 68 C68 2.6252 -0.1295 0.1840  | 95 H95 -7.7877 1.7837 -0.7497    |
| 69 C69 2.7147 5.9371 -2.3702  | 96 H96 -7.6226 0.0253 -0.5959    |
| 70 O70 3.2519 6.2728 -3.4115  | 97 C97 -7.9829 1.0462 1.2927     |
| 71 O71 1.9099 6.7376 -1.6530  | 98 H98 -9.0733 0.9700 1.2509     |
| 72 C72 1.6932 8.0738 -2.1807  | 99 H99 -7.6016 0.2231 1.9040     |
| 73 H73 2.6626 8.5723 -2.2741  | 100 H100 -7.7225 1.9919 1.7760   |
| 74 H74 1.2618 7.9864 -3.1824  | 101 C101 -2.2497 -2.3175 -0.5059 |
| 75 C75 0.7691 8.7895 -1.2173  | 102 C102 -3.2651 -2.1047 0.4343  |
| 76 H76 0.5791 9.8050 -1.5765  | 103 C103 -4.5910 -2.2171 0.0290  |
| 77 H77 -0.1881 8.2668 -1.1357 | 104 C104 -4.8949 -2.5288 -1.3029 |
| 78 H78 1.2187 8.8530 -0.2225  | 105 C105 -3.8638 -2.7527 -2.2263 |
| 79 C79 -1.0651 1.0366 -0.4524 | 106 C106 -2.5357 -2.6542 -1.8360 |
| 80 C80 -1.9025 1.3635 0.6235  | 107 H107 -3.0101 -1.8372 1.4528  |
| 81 C81 -3.2730 1.3643 0.4024  | 108 H108 -5.3901 -2.0430 0.7386  |
| 82 C82 -3.7885 1.0605 -0.8662 | 109 H109 -4.1216 -2.9930 -3.2510 |
| 83 C83 -2.9260 0.8097 -1.9405 | 110 H110 -1.7227 -2.8074 -2.5363 |
| 84 C84 -1.5519 0.7989 -1.7450 | 111 N111 -0.9303 -2.1273 -0.1317 |
| 85 H85 -1.4935 1.5586 1.6079  | 112 C112 0.1897 -1.9247 0.1499   |
| 86 H86 -3.9507 1.5613 1.2228  | 113 C113 -6.3027 -2.6285 -1.7965 |
| 87 H87 -3.3478 0.5814 -2.9118 | 114 O114 -6.5975 -2.8693 -2.9522 |
| 88 H88 -0.8652 0.5536 -2.5465 | 115 O115 -7.2039 -2.4351 -0.8180 |
| 89 N89 0.2806 0.8135 -0.2125  | 116 C116 -8.6030 -2.5574 -1.1982 |

117 H117 -8.8398 -1.7539 -1.9025  
118 H118 -8.7401 -3.5108 -1.7154  
119 C119 -9.4206 -2.4712 0.0738  
120 H120 -10.4835 -2.5598 -0.1676  
121 H121 -9.1528 -3.2786 0.7608  
122 H122 -9.2620 -1.5161 0.5817

### TSQ

1 C1 4.5515 -1.3926 0.1447  
2 C2 5.1279 -0.7964 1.4639  
3 C3 5.8389 0.4096 1.5106  
4 C4 4.8295 -1.4373 2.6784  
5 C5 6.2641 0.9415 2.7291  
6 H6 6.0467 0.9513 0.5975  
7 C7 5.2526 -0.9070 3.8981  
8 H8 4.2623 -2.3622 2.6686  
9 C9 5.9740 0.2876 3.9284  
10 H10 6.8176 1.8759 2.7372  
11 H11 5.0128 -1.4274 4.8204  
12 H12 6.3019 0.7067 4.8749  
13 C13 5.0884 -0.7305 -1.1403  
14 C14 6.4764 -0.6528 -1.3341  
15 C15 4.2608 -0.3390 -2.1983  
16 C16 7.0120 -0.1609 -2.5237  
17 H17 7.1434 -0.9912 -0.5480  
18 C18 4.7891 0.1466 -3.3963  
19 H19 3.1853 -0.4024 -2.0988

20 C20 6.1704 0.2458 -3.5624  
21 H21 8.0901 -0.1043 -2.6412  
22 H22 4.1162 0.4506 -4.1930  
23 H23 6.5865 0.6280 -4.4894  
24 C24 4.9088 -2.8895 -0.0387  
25 C25 4.2669 -3.6156 -1.0541  
26 C26 5.9382 -3.5164 0.6689  
27 C27 4.6108 -4.9350 -1.3290  
28 H28 3.4989 -3.1287 -1.6433  
29 C29 6.2923 -4.8424 0.3927  
30 H30 6.4758 -2.9783 1.4403  
31 C31 5.6276 -5.5604 -0.5989  
32 H32 4.0973 -5.4758 -2.1194  
33 H33 7.0948 -5.3070 0.9581  
34 H34 5.9018 -6.5893 -0.8111  
35 C35 1.1735 -2.2061 1.5096  
36 C36 0.1125 -3.0499 1.1278  
37 C37 -1.1079 -2.9673 1.7853  
38 C38 -1.2734 -2.0786 2.8608  
39 C39 -0.1749 -1.3359 3.3188  
40 C40 1.0416 -1.3980 2.6584  
41 H41 0.2476 -3.7266 0.2938  
42 H42 -1.9407 -3.5768 1.4549  
43 H43 -0.2986 -0.6932 4.1835  
44 H44 1.8923 -0.8189 3.0024  
45 N45 2.3828 -2.2554 0.8205  
46 C46 3.0256 -1.2238 0.4105

|                               |                                |
|-------------------------------|--------------------------------|
| 47 C47 -2.5893 -1.8410 3.5124 | 74 H74 1.1731 8.9744 -0.4553   |
| 48 O48 -2.8053 -0.9057 4.2672 | 75 C75 2.7630 9.6165 0.8898    |
| 49 O49 -3.5133 -2.7505 3.1498 | 76 H76 2.5848 10.6855 0.7405   |
| 50 C50 -4.8438 -2.6150 3.7213 | 77 H77 2.2502 9.3048 1.8043    |
| 51 H51 -5.1906 -3.6413 3.8563 | 78 H78 3.8374 9.4600 1.0219    |
| 52 H52 -4.7619 -2.1278 4.6943 | 79 C79 -0.8629 1.8084 0.9146   |
| 53 C53 -5.7479 -1.8390 2.7797 | 80 C80 -1.7638 1.4274 1.9222   |
| 54 H54 -6.7478 -1.7568 3.2163 | 81 C81 -3.1193 1.6875 1.7567   |
| 55 H55 -5.3647 -0.8295 2.6067 | 82 C82 -3.5790 2.3664 0.6188   |
| 56 H56 -5.8362 -2.3573 1.8209 | 83 C83 -2.6513 2.8648 -0.3076  |
| 57 C57 2.9267 2.4698 -0.0802  | 84 C84 -1.2960 2.5981 -0.1656  |
| 58 C58 3.3242 3.4663 0.8257   | 85 H85 -1.4219 0.8641 2.7793   |
| 59 C59 3.0562 4.7999 0.5437   | 86 H86 -3.8213 1.3266 2.4990   |
| 60 C60 2.4339 5.1615 -0.6617  | 87 H87 -3.0148 3.4165 -1.1672  |
| 61 C61 2.0869 4.1651 -1.5847  | 88 H88 -0.5760 2.9367 -0.9025  |
| 62 C62 2.3241 2.8265 -1.3010  | 89 N89 0.4721 1.3780 0.9642    |
| 63 H63 3.8183 3.1762 1.7466   | 90 C90 0.9403 0.4061 0.2881    |
| 64 H64 3.3372 5.5694 1.2530   | 91 C91 -5.0251 2.5087 0.2984   |
| 65 H65 1.6244 4.4572 -2.5213  | 92 O92 -5.4497 3.0874 -0.6885  |
| 66 H66 2.0698 2.0545 -2.0201  | 93 O93 -5.8192 1.8884 1.1904   |
| 67 N67 3.2525 1.1420 0.1984   | 94 C94 -7.2454 1.9691 0.9282   |
| 68 C68 2.4360 0.1671 0.3087   | 95 H95 -7.5405 3.0226 0.9354   |
| 69 C69 2.1295 6.5760 -1.0114  | 96 H96 -7.4368 1.5677 -0.0700  |
| 70 O70 1.5897 6.9221 -2.0499  | 97 C97 -7.9502 1.1687 2.0034   |
| 71 O71 2.5121 7.4378 -0.0521  | 98 H98 -9.0332 1.2624 1.8791   |
| 72 C72 2.2492 8.8412 -0.3068  | 99 H99 -7.6850 0.1109 1.9357   |
| 73 H73 2.7534 9.1295 -1.2344  | 100 H100 -7.6854 1.5332 2.9999 |

|                                  |                                   |
|----------------------------------|-----------------------------------|
| 101 C101 -2.4641 -0.4817 -1.0632 | 120 H120 -10.6887 -0.9588 -1.0814 |
| 102 C102 -3.4978 -1.0057 -0.2674 | 121 H121 -9.3718 -2.0741 -0.6668  |
| 103 C103 -4.8050 -0.9285 -0.7266 | 122 H122 -9.4691 -0.4825 0.1148   |
| 104 C104 -5.0917 -0.3190 -1.9567 | 123 Si123 0.6667 -1.9468 -3.0707  |
| 105 C105 -4.0509 0.1782 -2.7525  | 124 H124 -0.1770 -1.0597 -3.8792  |
| 106 C106 -2.7360 0.1000 -2.3176  | 125 H125 2.0890 -1.9897 -3.4246   |
| 107 H107 -3.2683 -1.4433 0.6954  | 126 C127 -0.0649 -3.5105 -2.4770  |
| 108 H108 -5.6146 -1.3080 -0.1179 | 127 C128 -1.4467 -3.6112 -2.2056  |
| 109 H109 -4.2911 0.6462 -3.7002  | 128 C129 0.7767 -4.6009 -2.1641   |
| 110 H110 -1.9294 0.5309 -2.8988  | 129 C130 -1.9671 -4.7653 -1.6247  |
| 111 N111 -1.1999 -0.3842 -0.5458 | 130 H131 -2.1155 -2.7886 -2.4388  |
| 112 C112 0.0088 -0.4014 -0.5978  | 131 C132 0.2489 -5.7576 -1.5942   |
| 113 C113 -6.4910 -0.1490 -2.4509 | 132 H133 1.8421 -4.5455 -2.3593   |
| 114 O114 -6.7711 0.3012 -3.5468  | 133 C134 -1.1199 -5.8353 -1.3151  |
| 115 O115 -7.4020 -0.5392 -1.5435 | 134 H135 -3.0292 -4.8303 -1.4113  |
| 116 C116 -8.7968 -0.4261 -1.9395 | 135 H136 0.9035 -6.5900 -1.3574   |
| 117 H117 -9.0223 0.6315 -2.1070  | 136 H137 -1.5270 -6.7308 -0.8561  |
| 118 H118 -8.9325 -0.9555 -2.8868 | 137 H126 -0.6344 -1.0179 -1.582   |
| 119 C119 -9.6280 -1.0223 -0.8223 |                                   |

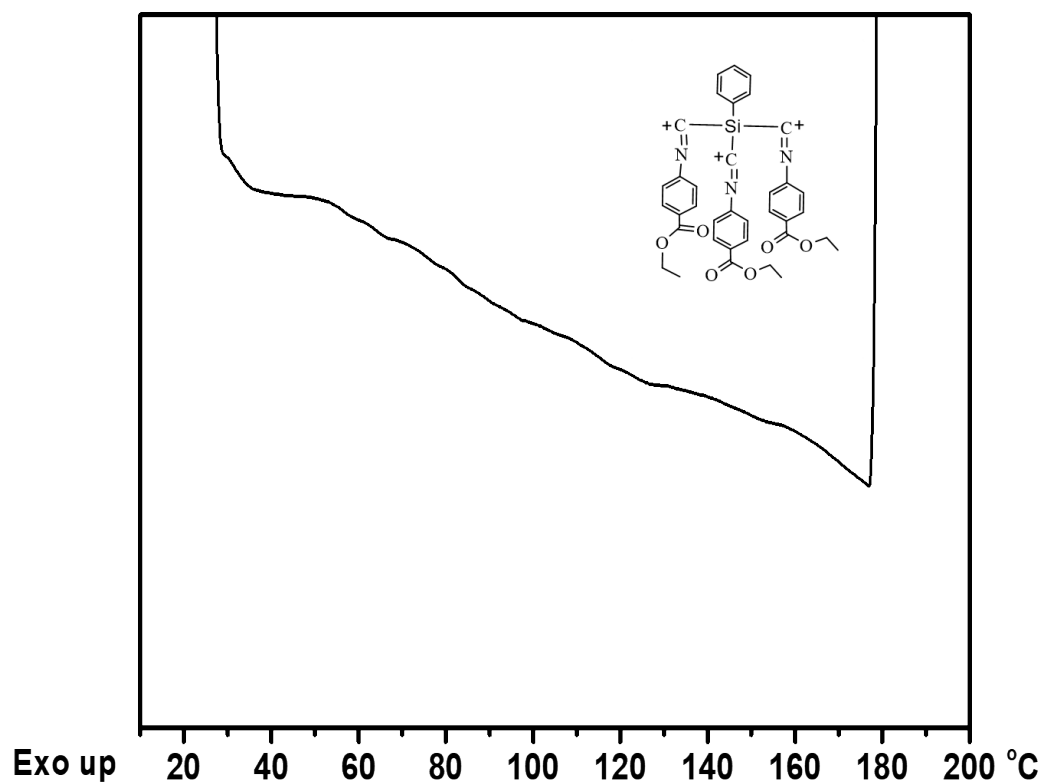

**Figure S90.** DSC curve of PhSi-end-functionalized **star** poly(EPI) in **Table 3, entry 1**.

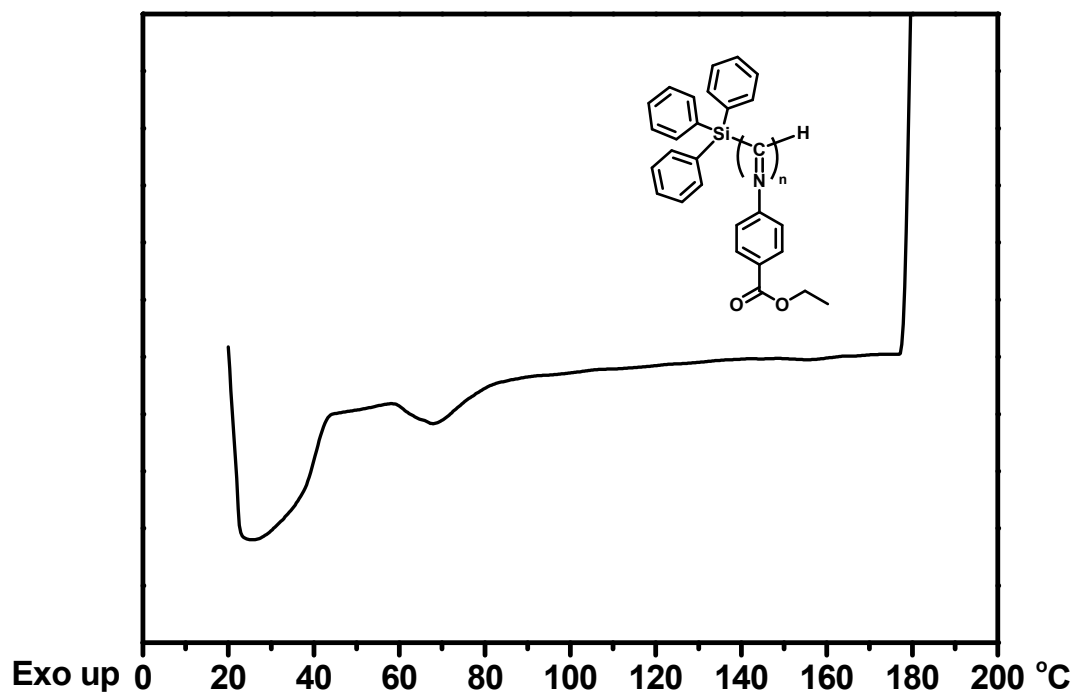

**Figure S91.** DSC curve of Ph<sub>3</sub>Si-end-functionalized poly(EPI) in **Table 2, entry 3**.

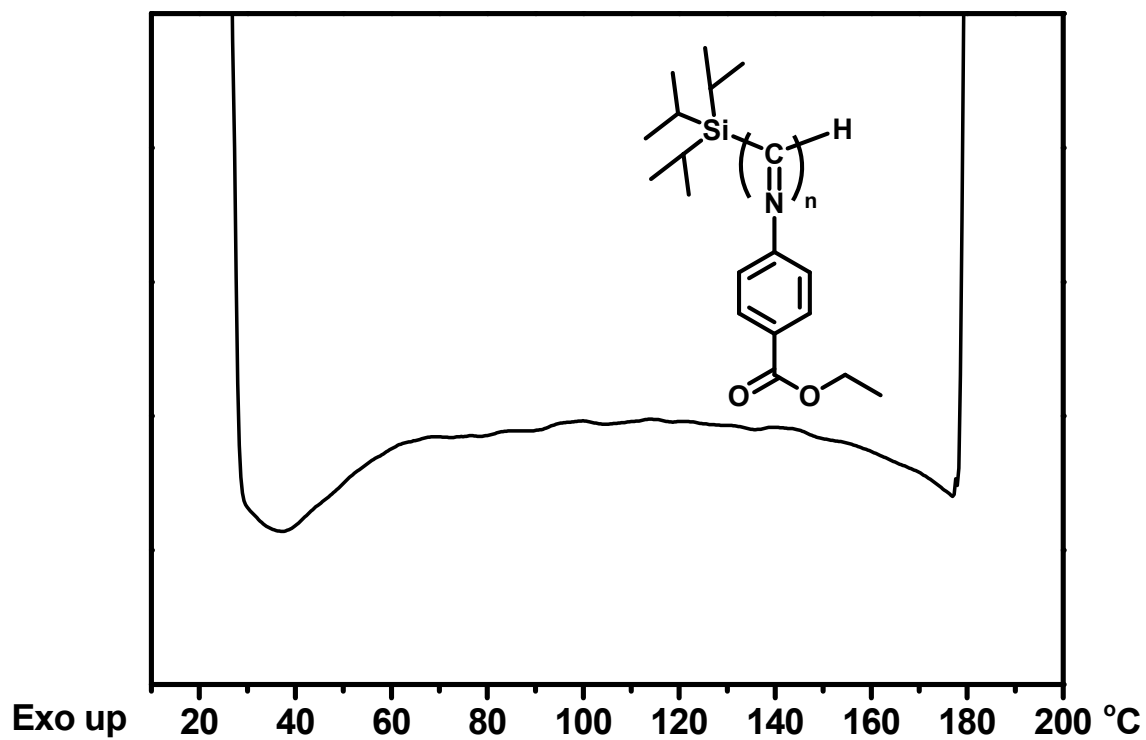

**Figure S92.** DSC curve of *i*Pr<sub>3</sub>Si-end-functionalized poly(EPI) in [Table 2, entry 5](#).

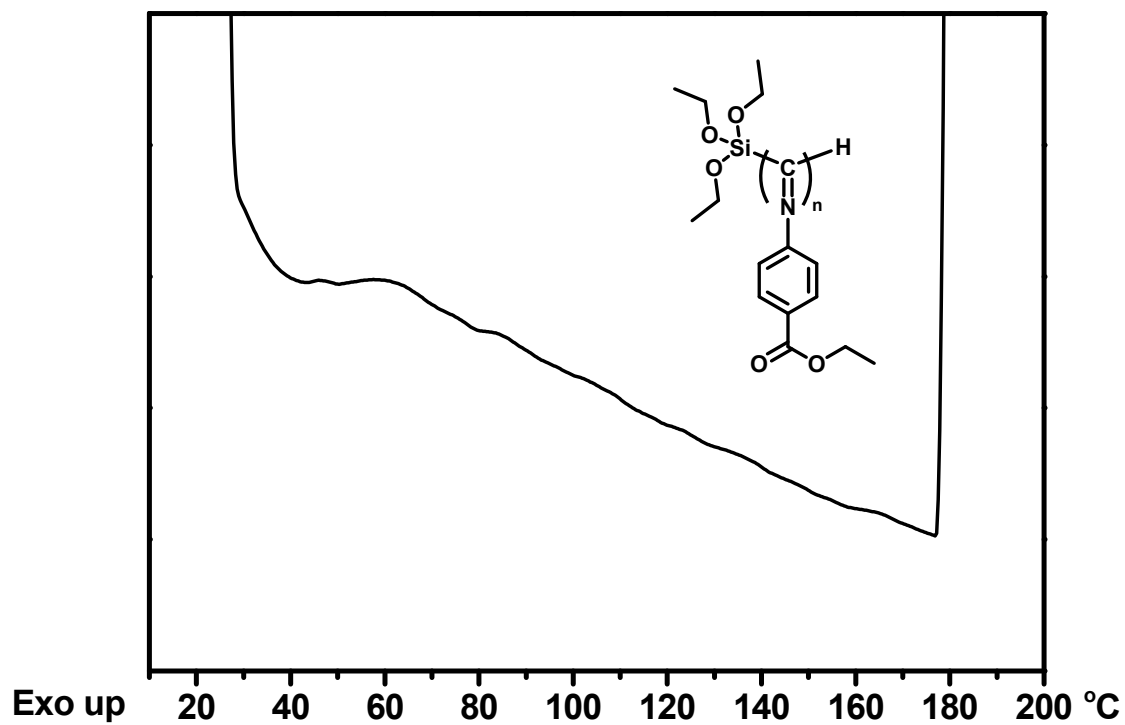

**Figure S93.** DSC curve of (OEt)<sub>3</sub>Si-end-functionalized poly(EPI) in [Table 2, entry 6](#).

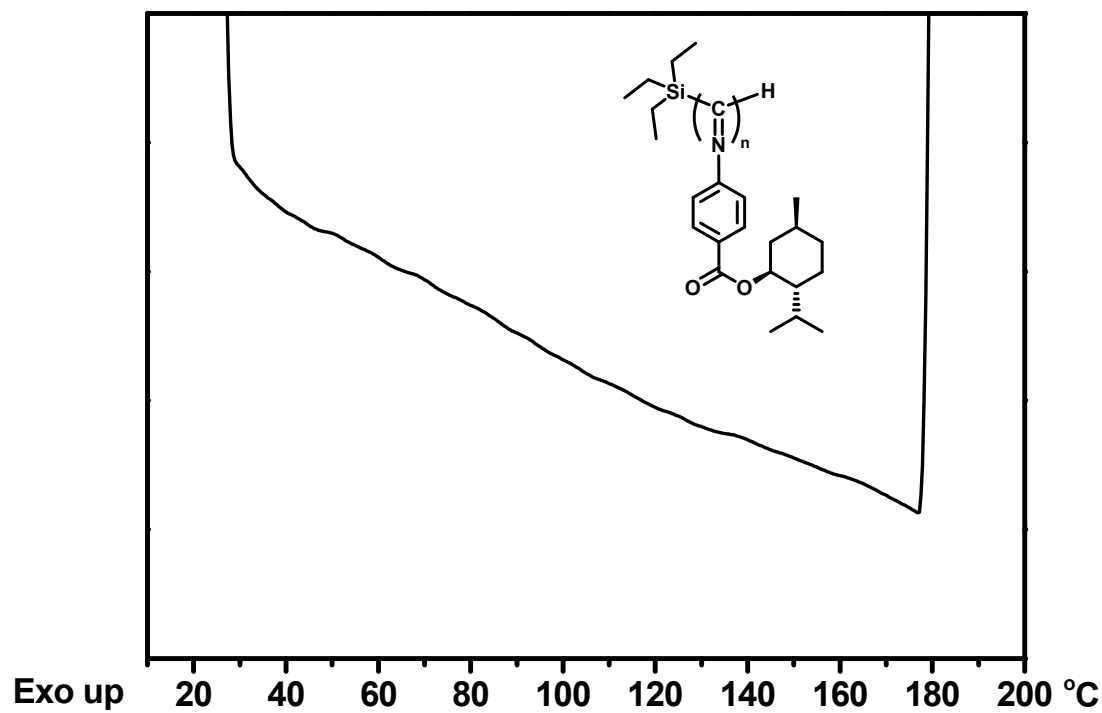

**Figure S94.** DSC curve of triethylsilane-end-capped Poly(D-IMCI) [Table 2, entry 9](#).

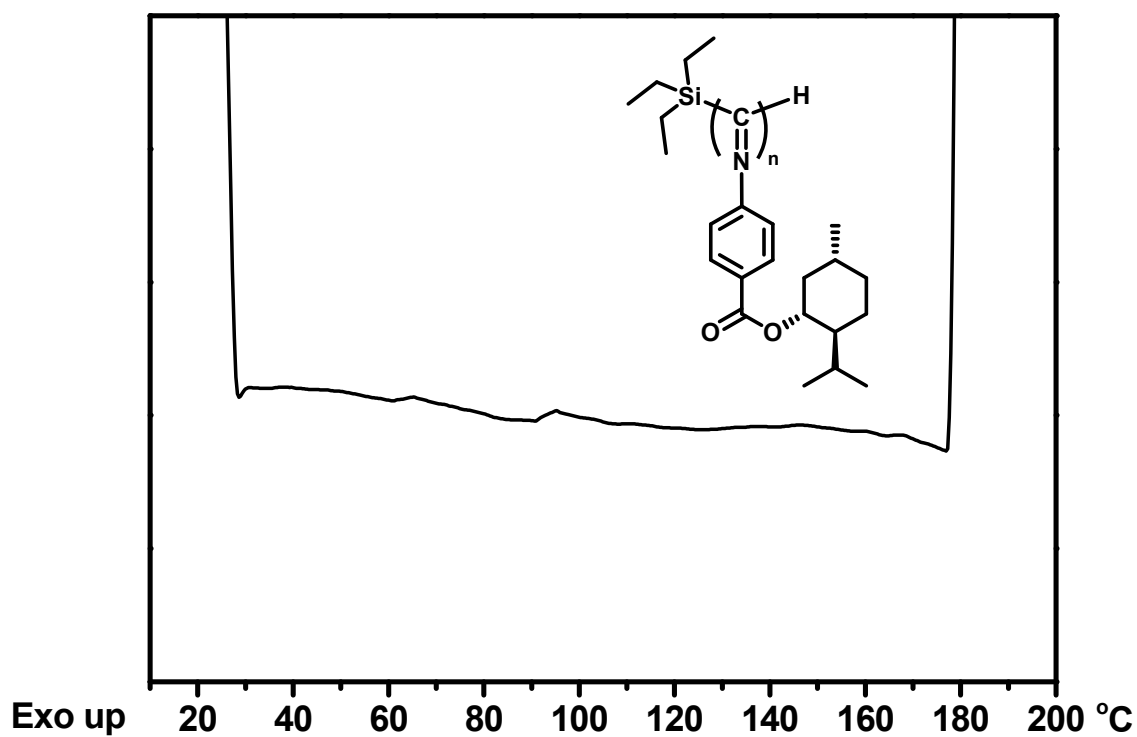

**Figure S95.** DSC curve of triethylsilane-end-capped Poly(L-IMCI) in [Table 2, entry 10](#).

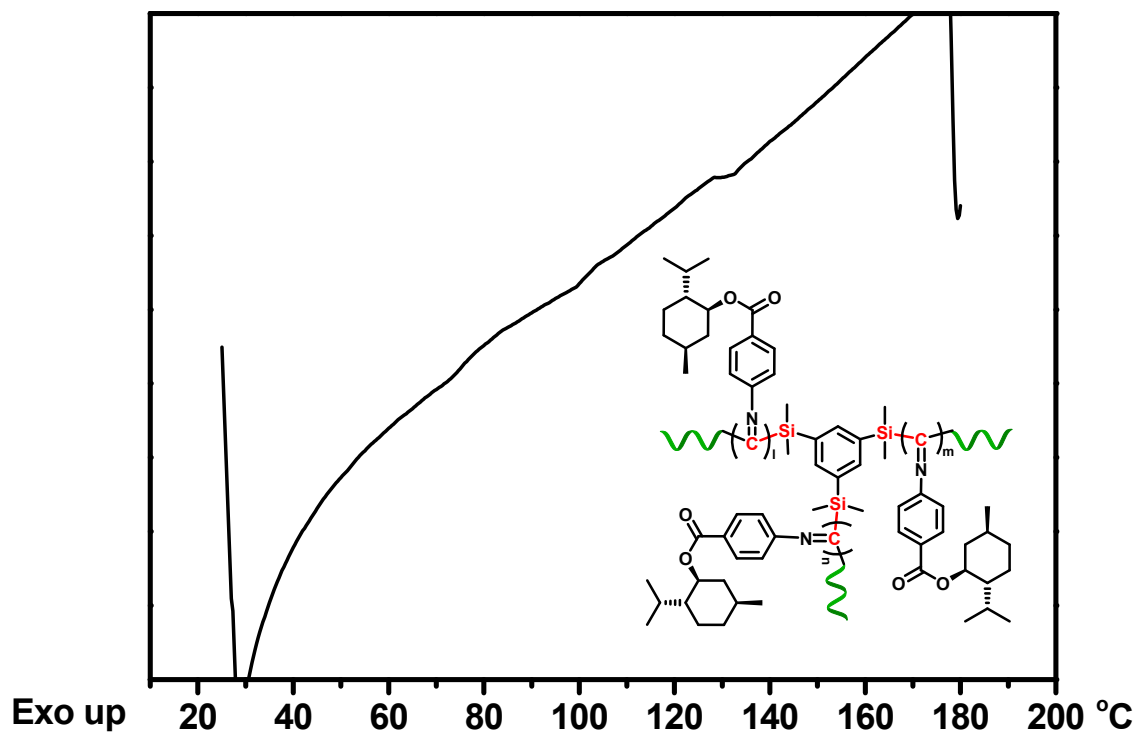

**Figure S96.** DSC curve of silane-end-capped star Poly(D-IMCI) in [Table 3, entry 2](#).

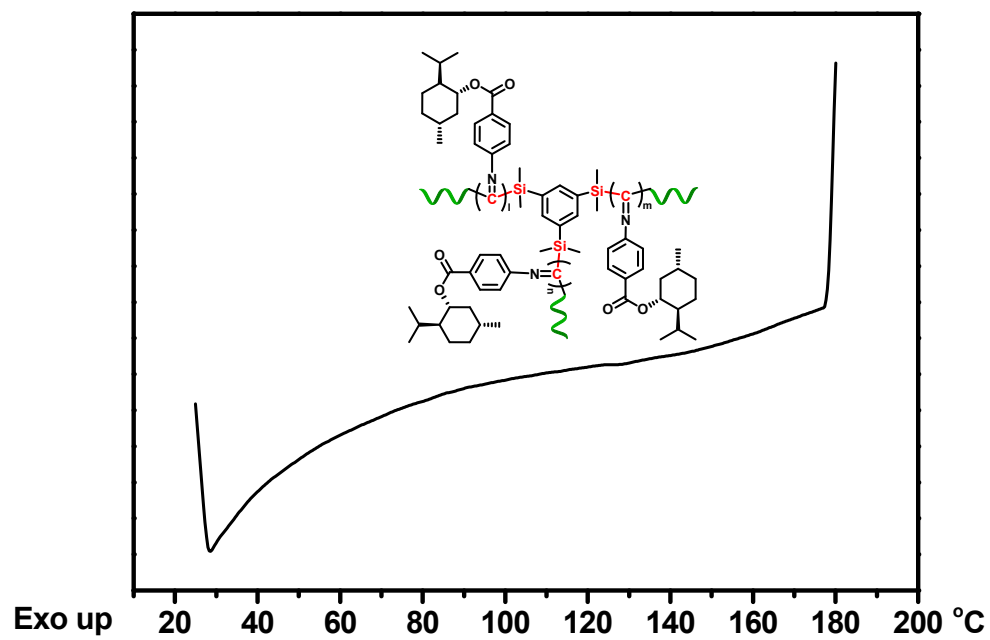

**Figure S97.** DSC curve of silane-end-capped star Poly(L-IMCI) in [Table 3, entry 3](#).



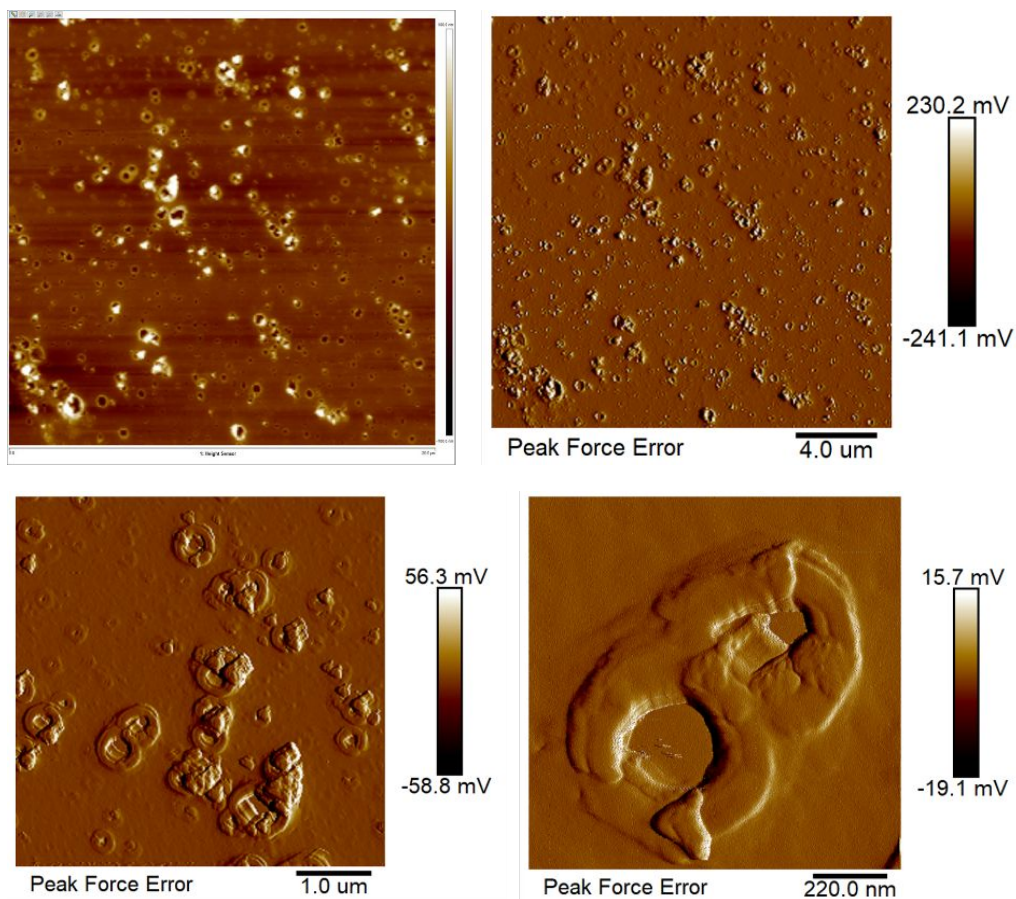

**Figure S98.** AFM image of silane-end-capped star Poly(L-IMCI) in Table 3, entry 3.

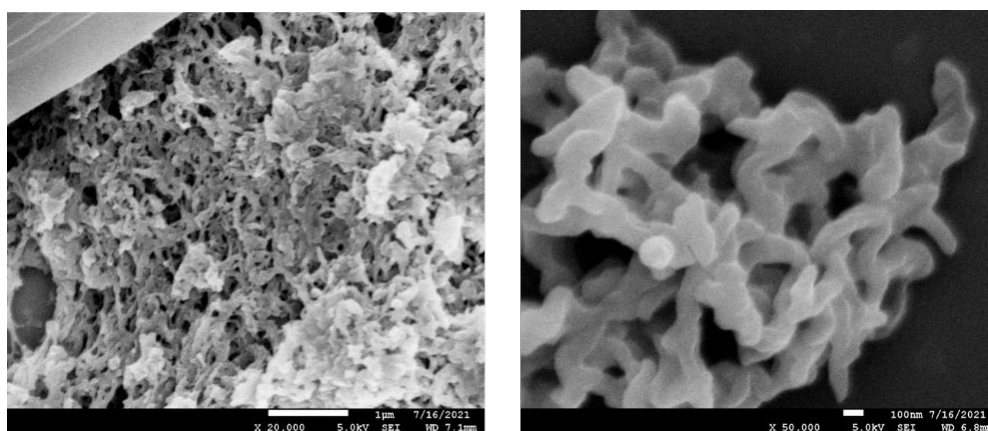

**Figure S99.** SEM image of silane-end-capped star Poly(L-IMCI) in Table 3, entry 3.

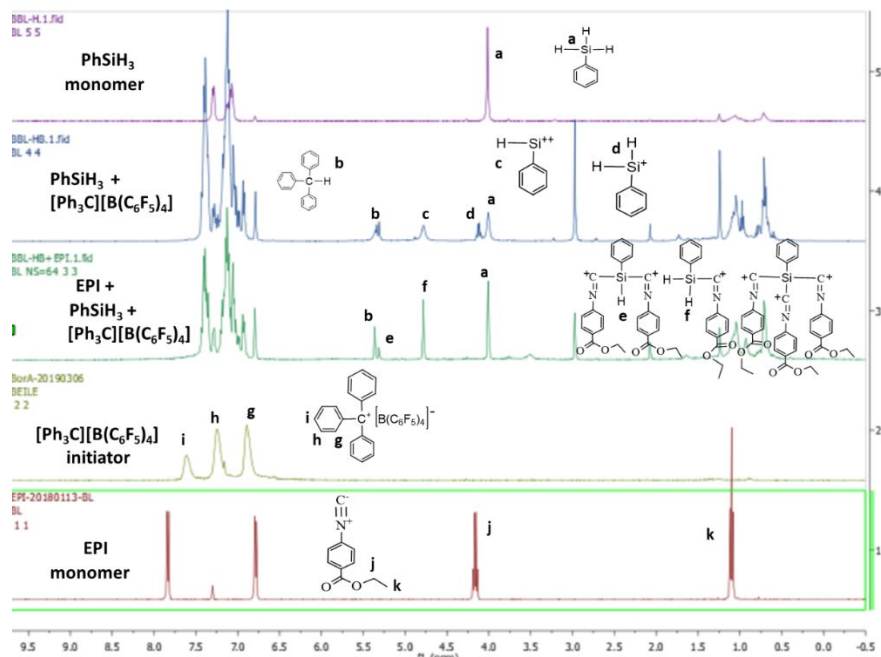

**Figure S100.** The *in situ*  $^1\text{H}$  NMR spectra of the polymerization of EPI by the  $[\text{Ph}_3\text{C}][\text{B}(\text{C}_6\text{F}_5)_4]/\text{PhSiH}_3$  binary system under the molar ratio of  $[\text{EPI}]/\{[\text{Ph}_3\text{C}][\text{B}(\text{C}_6\text{F}_5)_4]\}/[\text{PhSiH}_3]$  as 10:1:10 at room temperature in  $d^8$ -THF.

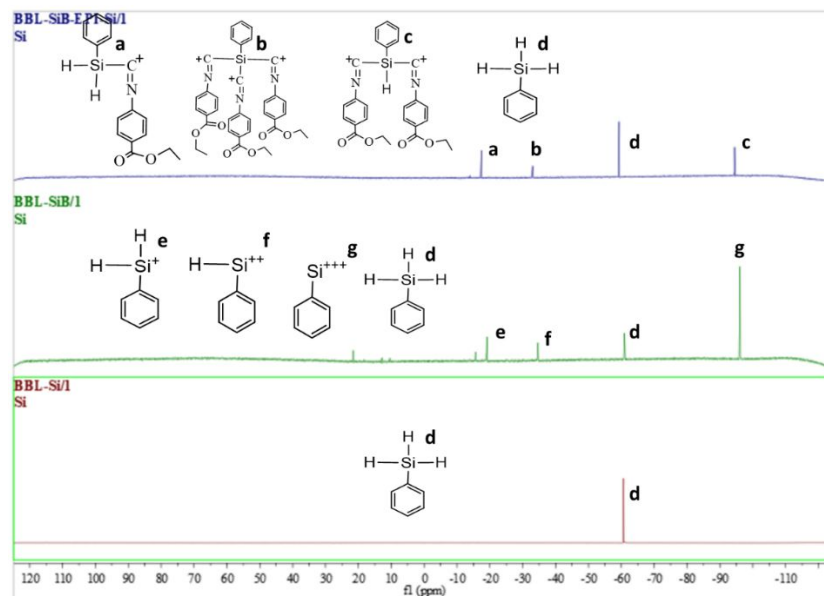

**Figure S101.** The *in situ*  $^{29}\text{Si}$  NMR spectra of the polymerization of EPI by the  $[\text{Ph}_3\text{C}][\text{B}(\text{C}_6\text{F}_5)_4]/\text{PhSiH}_3$  binary system under the molar ratio of  $[\text{EPI}]/\{[\text{Ph}_3\text{C}][\text{B}(\text{C}_6\text{F}_5)_4]\}/[\text{PhSiH}_3]$  as 10:1:10 at room temperature in  $d^8$ -THF.

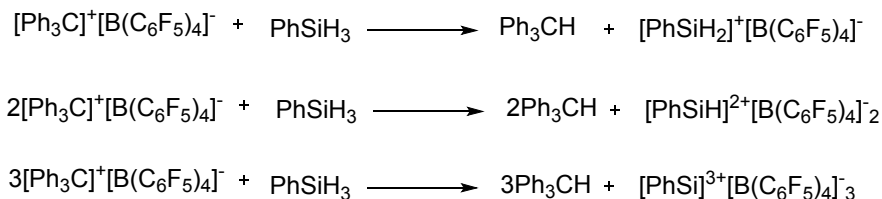

**Figure S102.** The reaction of  $[\text{Ph}_3\text{C}][\text{B}(\text{C}_6\text{F}_5)_4]$  and  $\text{PhSiH}_3$  under the molar ratio of  $[\text{EPI}]/\{[\text{Ph}_3\text{C}][\text{B}(\text{C}_6\text{F}_5)_4]\}/[\text{PhSiH}_3]$  as 10:1:10 at room temperature in 1h.

## References

- (1) X. W. Yan, S. W. Zhang, D. Q. Peng, J.G. Zhi, P. F. Zhang, X. L. Wu, L. Wang, Y. P. Dong, and X. F. Li\*, *Polym. Chem.* **2018**, 9, 984–993.
- (2) (a) M. A-Cortes, B. Heinrich, B. Donnio, K. E. Evans, C. W. Smith and D. W. Bruce\*, *J. Mater. Chem.* **2011**, 21, 8427–8435. (b) A. Naka, Y. Matsumoto, T. Itano, K. Hasegawa, T. Shimamura, J. Osshita, A. Kunai, T. Takae, and M. Ishikawa\*, *J. Organomet. Chem.* **2009**, 694, 345–352.
- (3) (a), M. Amela-Cort, B. Heinrich, B. Donnio, K. E. Evans, C. W. Smitha, D. W. Bruce, *J. Mater. Chem.*, 2011, 21, 8427–8435. (b), H. Pleino, *J. Organomet. Chem.* **1992**, 435, 21.
- (4) Z.J. Zhao, J.W.Y. Lam, B.Z. Tang, *J. Mater. Chem.* **2012**, 22, 23723–23740.
- (5) A. D. Becke, *J. Chem. Phys.*, 1993, **98**, 1372–1377.
- (6) A. D. Becke, *J. Chem. Phys.*, 1993, **98**, 5648–5652.
- (7) C. Lee, W. Yang and R. G. Parr, *Phys. Rev. B.*, 1988, **37**, 785-789.
- (8) M. J. Frisch, G. W. Trucks, H. B. Schlegel, G. E. Scuseria, M. A. Robb, J. R. Cheeseman, G. Scalmani, V. Barone, B. Mennucci, G. A. Petersson, H. Nakatsuji, M. Caricato, X. Li, H. P. Hratchian, A. F. Izmaylov, J. Bloino, G. Zheng, J. L. Sonnenberg, M. Hada, M. Ehara, K. Toyota, R. Fukuda, J. Hasegawa, M. Ishida, T. Nakajima, Y. Honda, O. Kitao, H. Nakai, T. Vreven, J. A. Montgomery, J. E. Peralta, F. Ogliaro, M. Bearpark, J. J. Heyd, E. Brothers, K. N. Kudin, V. N. Staroverov, T. Keith, R. Kobayashi, J. Normand, K. Raghavachari, A. Rendell, J. C. Burant, S. S. Iyengar, J. Tomasi, M. Cossi, N. Rega, J. M. Millam, M. Klene, J. E. Knox, J. B. Cross, V. Bakken, C. Adamo, J. Jaramillo, R. Gomperts, R. E. Stratmann, O. Yazyev, A. J. Austin, R. Cammi, C. Pomelli, J. W. Ochterski, R. L. Martin, K. Morokuma, V. G. Zakrzewski, G. A.

Voth, P. Salvador, J. J. Dannenberg, S. Dapprich, A. D. Daniels, O. Farkas, J. B. Foresman, J. V. Ortiz, J. Cioslowski, D. J. Fox, *Gaussian 09*, Revision D.01; Gaussian: Wallingford, CT, USA, 2013.

(9) S. Grimme, *J. Comput. Chem.*, 2004, **25**, 1463.

(10) S. Grimme, *J. Comput. Chem.*, 2006, **27**, 1787.

(11) S. Grimme, J. Antony, S. Ehrlich, H. Krieg, *J. Chem. Phys.*, 2010, **132**, 154104.

(12) L. Goerigk, S. Grimme, *Phys. Chem. Chem. Phys.*, 2011, **13**, 6670–6688.

(13) A. Klamt, G. Schüürmann, *J. Chem. Soc. Perkin. Trans.*, 1993, **2**, 799.

(14) R. Cammi, B. Mennucci, J. Tomasi, *J. Phys. Chem. A*, 1999, **103**, 9100.

(15) V. Barone, M. Cossi, *J. Phys. Chem. A*, 1998, **102**, 1995.

(16) J. Tomasi, B. Mennucci, R. Cammi, *Chem. Rev.*, 2005, **105**, 2999.
